# Supplementary material for: Nickel-catalysed SET-reduction-based access to functionalized allenes via 1,4-carbohydrogenation of 1,3-enynes with alkyl bromides
Source: Royal Society of Chemistry journal article supplement (doi:10.1039/d2qo00672c), 2022-01-01

# Supporting Information for

**Nickel-catalysed SET-reduction-based access to functionalized allenes *via* 1,4-carbohydrogenation of 1,3-enynes with alkyl bromides**

Wan Lei, Hong Liu, Yan Li and Yewen Fang

## Table of contents

|                                                                                                 |            |
|-------------------------------------------------------------------------------------------------|------------|
| <b>1 General Information .....</b>                                                              | <b>S1</b>  |
| <b>1.1 Solvents, Reagents, and Starting Materials .....</b>                                     | <b>S1</b>  |
| <b>1.2 Instruments .....</b>                                                                    | <b>S1</b>  |
| <b>2 Synthesis of 1,3-enynes 6, 8, and 14 .....</b>                                             | <b>S1</b>  |
| <b>3 General procedure for the preparation of 1,3-allenes 3, 5, 7, 10, 11, 13, and 15 .....</b> | <b>S5</b>  |
| <b>4 Deuteration study .....</b>                                                                | <b>S20</b> |
| <b>5 Transformation of 1,2-allenyl ketones .....</b>                                            | <b>S22</b> |
| <b>6 Reference .....</b>                                                                        | <b>S23</b> |
| <b>7 NMR spectra of new compound .....</b>                                                      | <b>S23</b> |

# 1 General Information

## 1.1 Solvents, Reagents, and Starting Materials

All reactions were carried out under an atmosphere of nitrogen in oven-dried glassware. 2-(1-Alkynyl)-2-alken-1-ones **1**, **4**, and **12** were reported in our previous works.<sup>1, 2</sup> Tertiary alkyl bromides **2** and **9** were prepared according to the published procedures.<sup>3</sup> Dried solvents were obtained from commercial sources and used without further purification unless otherwise noted.

## 1.2 Instruments

NMR spectra were recorded on a Bruker Avance 500 spectrometer (500 MHz) (500 MHz for <sup>1</sup>H NMR and 126 MHz for <sup>13</sup>C NMR). Chemical shifts were reported in ppm downfield from tetramethylsilane and calibrated using residue undeuterated solvent (CDCl<sub>3</sub> at 7.26 ppm <sup>1</sup>H NMR; 77.0 ppm <sup>13</sup>C NMR). Spectra were reported as follows: chemical shift (δ ppm), multiplicity (s = singlet, d = doublet, t = triplet, q = quartet, m = multiplet, br = broad). Coupling constants are reported in Hertz where available. High resolution mass spectra (HRMS) were recorded on Waters Premier GC-TOF MS. Analytical thin layer chromatography was performed on Polygram SIL G/UV<sub>254</sub> plates. Visualization was accomplished with short wave UV light, or KMnO<sub>4</sub> staining solutions. Flash column chromatography was performed using silica gel (300-400 mesh) with solvents to use.

## 2 Synthesis of 1,3-enynes **6**, **8**, and **14**

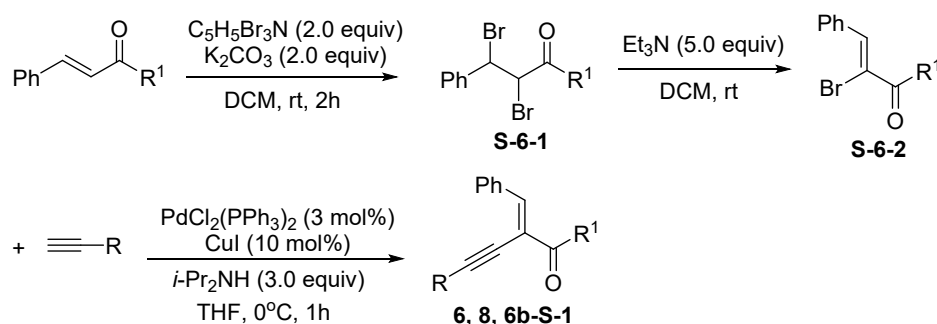

To a solution of (*E*)-chalcone (15.0 mmol, 1.0 equiv) in DCM (50 mL), pyridinium tribromide (9.6 g, 30.0 mmol, 1.0 equiv) and potassium carbonate (4.2 g, 30.0 mmol, 2.0 equiv) was added, and the mixture was stirred for 2 h at room temperature. Then, the saturated Na<sub>2</sub>S<sub>2</sub>O<sub>3</sub> solution was added, the mixture was filtered and extracted with ethyl acetate (3x25 mL), dried over MgSO<sub>4</sub>, the solvent was evaporated in vacuum.

The product was recrystallized from DCM/hexane to afford the desired product **S-6-1** with good yield.

To a solution of 2,3-dibromopropan-1-one **S-6-1** (10.0 mmol, 1.0 equiv) in DCM (30 mL), triethylamine (7 mL, 50.0 mmol, 5.0 equiv) was added and the reaction mixture was stirred at room temperature for 12-36 h. Then, the saturated NH<sub>4</sub>Cl solution (20 mL) was added, phases were separated, water phase was extracted by ethyl acetate (3x15 mL). Combined organic phase was washed with 1M HCl (4x15 mL), dried over MgSO<sub>4</sub> and evaporated in vacuo. The mixture was purified by flash column chromatography to afford **S-6-2**.

A solution of (*Z*)-2-bromoprop-2-en-1-one **S-6-2** (5.0 mmol, 1.0 equiv) in THF (25 mL) was treated with PdCl<sub>2</sub>(PPh<sub>3</sub>)<sub>2</sub> (105.3 mg, 0.15 mmol, 3 mol%) and CuI (95.2 mg, 0.5 mmol, 10 mol%) and cooled down to 0°C in the dark. After 10 min of stirring, 3,3-dimethylbut-1-yne (1.2 mL, 10.0 mmol, 2.0 equiv) and diisopropylamine (2.1 mL, 15.0 mmol, 3.0 equiv) were added, and the resulting dark brown solution was stirred at 0 ° C for 1 h. The reaction mixture was partitioned between ethyl acetate and 0.5 N aqueous HCl solution. The aqueous layer was extracted with ethyl acetate (3x10 mL) and the combined organic phases were washed with brine, dried over MgSO<sub>4</sub>, filtered and concentrated under vacuum. The crude product was purified by flash column chromatography to yield the corresponding 2-(1-alkynyl)-2-alken-1-one **6, 8 (6b-S-1)**. Additional reaction of **6b-S-1** with acetyl chloride (1.1 equiv) and trimethylamine (2.7 equiv) in DCM is required to obtain **6b**.

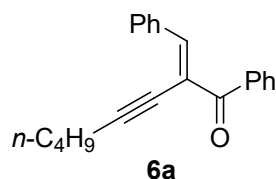

**(E)-2-Benzylidene-1-phenyloct-3-yn-1-one (6a).** Yellow oil. <sup>1</sup>H NMR (500 MHz, CDCl<sub>3</sub>) δ 8.06-8.03 (m, 2H), 7.93-7.91 (m, 2H), 7.57-7.54 (m, 1H), 7.47-7.40 (m, 6H), 2.46 (t, *J* = 7.0 Hz, 2H), 1.58-1.52 (m, 2H), 1.42-1.37 (m, 2H), 0.90 (t, *J* = 7.3 Hz, 3H). <sup>13</sup>C NMR (126 MHz, CDCl<sub>3</sub>) δ 194.3, 144.0, 137.3, 134.9, 132.3, 130.2, 130.0, 129.7, 128.4, 128.0, 121.8, 103.2, 78.0, 30.2, 21.9, 19.7, 13.6. These data are consistent with the published literature.<sup>4</sup>

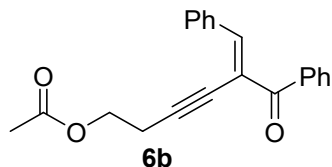

**(E)-5-Benzoyl-6-phenylhex-5-en-3-yn-1-yl acetate (6b).** Yellow oil. <sup>1</sup>H NMR (500 MHz, CDCl<sub>3</sub>) δ 8.03-8.01 (m, 2H), 7.92-7.90 (m, 2H), 7.58-7.55 (m, 1H), 7.49-7.40 (m, 6H), 4.21 (t, *J* = 6.6 Hz, 2H), 2.81 (t, *J* = 6.7 Hz, 2H), 2.04 (s, 3H). <sup>13</sup>C NMR (126 MHz, CDCl<sub>3</sub>) δ 193.9, 170.8, 145.2, 137.1, 134.6, 132.4, 130.5, 130.1, 129.7, 128.5, 128.0, 121.1, 97.9, 79.2, 61.9, 20.8, 20.5. HRMS (ESI) [M+Na]<sup>+</sup>: calculated for C<sub>21</sub>H<sub>18</sub>O<sub>3</sub>Na: 341.1154, found 341.1152.

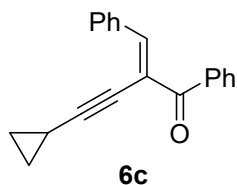

**(E)-2-Benzylidene-4-cyclopropyl-1-phenylbut-3-yn-1-one (6c).** Yellow oil.  $^1\text{H}$  NMR (500 MHz,  $\text{CDCl}_3$ )  $\delta$  8.02-8.00 (m, 2H), 7.91-7.89 (m, 2H), 7.57-7.54 (m, 1H), 7.47-7.39 (m, 6H), 1.52-1.47 (m, 1H), 0.89-0.85 (m, 2H), 0.77-0.74 (m, 2H).  $^{13}\text{C}$  NMR (126 MHz,  $\text{CDCl}_3$ )  $\delta$  194.1, 144.0, 137.3, 134.9, 132.3, 130.2, 129.9, 129.7, 128.4, 127.9, 121.6, 106.1, 73.3, 8.7, 0.9. These data are consistent with the published literature.<sup>5</sup>

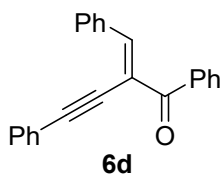

**(E)-2-Benzylidene-1,4-diphenylbut-3-yn-1-one (6d).** Yellow solid.  $^1\text{H}$  NMR (500 MHz,  $\text{CDCl}_3$ )  $\delta$  8.14-8.12 (m, 2H), 8.02-8.00 (m, 2H), 7.64 (s, 1H), 7.61-7.57 (m, 1H), 7.51-7.44 (m, 5H), 7.41-7.39 (m, 2H), 7.36-7.32 (m, 3H).  $^{13}\text{C}$  NMR (126 MHz,  $\text{CDCl}_3$ )  $\delta$  193.4, 145.1, 137.1, 134.8, 132.5, 131.3, 130.6, 130.4, 129.7, 128.8, 128.6, 128.4, 128.1, 122.8, 120.9, 100.8, 87.1. These data are consistent with the published literature.<sup>6</sup>

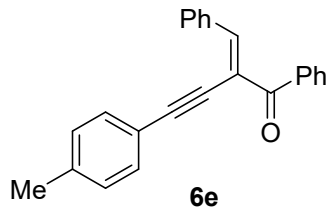

**(E)-2-Benzylidene-1-phenyl-4-(p-tolyl)but-3-yn-1-one (6e).** Yellow oil.  $^1\text{H}$  NMR (500 MHz,  $\text{CDCl}_3$ )  $\delta$  8.14-8.12 (m, 2H), 8.02-8.00 (m, 2H), 7.61 (s, 1H), 7.60-7.57 (m, 1H), 7.50-7.43 (m, 4H), 7.31-7.29 (m, 2H), 7.15-7.11 (m, 2H), 2.37 (s, 3H).  $^{13}\text{C}$  NMR (126 MHz,  $\text{CDCl}_3$ )  $\delta$  193.5, 144.6, 139.1, 137.2, 134.9, 132.5, 131.2, 130.5, 130.3, 129.7, 129.2, 128.5, 128.0, 121.0, 119.8, 101.2, 86.6, 21.6. These data are consistent with the published literature.<sup>5</sup>

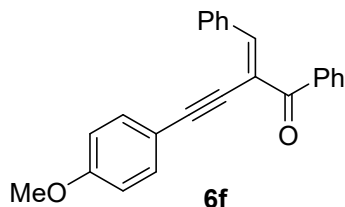

**(E)-2-Benzylidene-4-(4-methoxyphenyl)-1-phenylbut-3-yn-1-one (6f).** Yellow solid.  $^1\text{H}$  NMR (500 MHz,  $\text{CDCl}_3$ )  $\delta$  8.13-8.11 (m, 2H), 8.01-7.99 (m, 2H), 7.60-7.56 (m, 2H), 7.50-7.42 (m, 5H), 7.35-7.32 (m, 2H), 6.91-6.84 (m, 2H), 3.82 (s, 3H).  $^{13}\text{C}$  NMR (126 MHz,  $\text{CDCl}_3$ )  $\delta$  193.6, 160.1, 144.1, 137.2, 135.0, 132.9, 132.4, 130.4,

130.3, 129.7, 128.5, 128.0, 121.1, 115.0, 114.1, 101.1, 86.1, 55.3. These data are consistent with the published literature.<sup>6</sup>

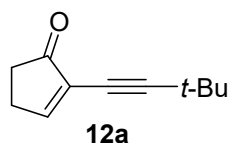

**2-(3,3-Dimethylbut-1-yn-1-yl)cyclopent-2-en-1-one (12a).** Pale yellow solid. <sup>1</sup>H NMR (500 MHz, CDCl<sub>3</sub>) δ 7.67 (d, *J* = 3.1 Hz, 1H), 2.67-2.65 (m, 2H), 2.44-2.42 (m, 2H), 1.28 (s, 9H). <sup>13</sup>C NMR (126 MHz, CDCl<sub>3</sub>) δ 206.0, 163.8, 130.5, 105.4, 69.7, 33.9, 30.8, 28.1, 27.0. HRMS (ESI) [M+H]<sup>+</sup>: calculated for C<sub>11</sub>H<sub>15</sub>O: 163.1123, found 163.1121.

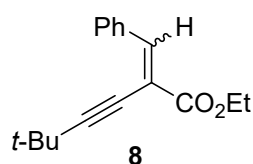

**Ethyl 2-benzylidene-5,5-dimethylhex-3-ynoate (8):** *E/Z* isomer (1:1 based on <sup>1</sup>H NMR). Colorless oil. <sup>1</sup>H NMR (500 MHz, CDCl<sub>3</sub>) δ 8.05-8.04 (m, 1H), 7.80 (s, 0.5H), 7.41-7.27 (m, 4H), 7.07 (s, 0.5H), [4.29 (q, *J* = 7.1 Hz, 1H), 4.20 (q, *J* = 7.1 Hz, 1H)], [1.36 (s, 4.5H), 1.29 (s, 4.5H)], [1.38-1.35 (t, *J* = 7.2 Hz, 1.5H), 1.20 (t, *J* = 7.1 Hz, 1.5H)]. <sup>13</sup>C NMR (126 MHz, CDCl<sub>3</sub>) δ 166.2, 166.1, 143.7, 141.5, 135.0, 134.7, 130.2, 130.1, 128.6, 128.4, 128.2(2), 128.1(8), 117.4, 113.8, 107.8, 101.1, 76.7, 75.1, 61.5, 61.4, 30.8, 30.6, 28.6, 28.1, 14.1, 13.7. HRMS (ESI) [M+H]<sup>+</sup>: calculated for C<sub>17</sub>H<sub>21</sub>O<sub>2</sub>: 257.1542, found 257.1546.

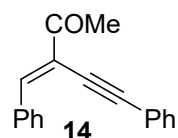

**(*E*)-2-benzylidene-1,4-diphenylbut-3-yn-1-one (14).** Pale yellow solid. <sup>1</sup>H NMR (500 MHz, CDCl<sub>3</sub>) δ 8.11-8.09 (m, 2H), 7.83 (s, 1H), 7.57-7.55 (m, 2H), 7.45-7.40 (m, 6H), 2.62 (s, 3H). <sup>13</sup>C NMR (126 MHz, CDCl<sub>3</sub>) δ 196.2, 142.9, 134.5, 131.4, 130.7, 128.9, 128.6, 122.8, 120.0, 99.1, 87.0, 28.2. These data are consistent with the published literature.<sup>7</sup>

### 3 General procedure for the preparation of 1,3-allenes **3**, **5**, **7**, **10**, **11**, **13**, and **15**

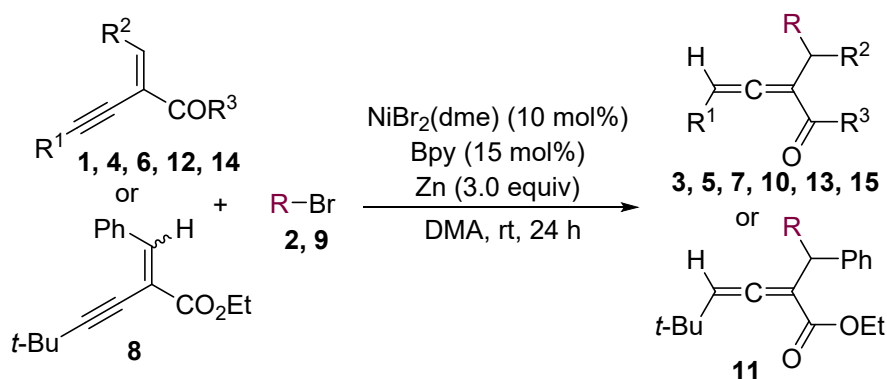

To an oven-dried Schlenk tube was charged with 2-(1-alkynyl)-2-alken-1-one (0.2 mmol, 1.0 equiv), NiBr<sub>2</sub>(dme) (10 mol%), 2,2'-bipyridine (15 mol%), Zn (0.6 mmol, 3.0 equiv). The tube was capped with a rubber septum, evacuated and back-filled with nitrogen three times, at which point DMA (2 mL) was added via a syringe prior to the addition of alkyl halide (0.4 mmol, 2.0 equiv). The reaction mixture was allowed to stir at room temperature for 24 h, 3 mL of H<sub>2</sub>O was added to quench the reaction and the mixture was extracted by ethyl acetate. The combined organic layer was dried over MgSO<sub>4</sub>. After filtration and concentration, the residue was purified by column chromatography on silica gel. The ratio of diastereoisomers was determined by <sup>1</sup>H NMR analysis.

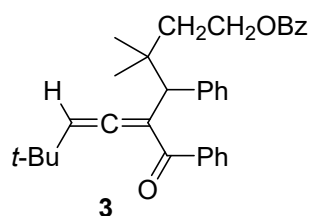

**5-Benzoyl-3,3,8,8-tetramethyl-4-phenylnona-5,6-dien-1-yl benzoate (3).** Flash column chromatography to afford product **3** as a white solid (85.5 mg, 89% yield, dr = 49:51). Two diastereoisomers are hard to be separated by column chromatography on silica gel. <sup>1</sup>H NMR (500 MHz, CDCl<sub>3</sub>) δ 8.03-8.00 (m, 2H), 7.65-7.63 (m, 1H), 7.56-7.51 (m, 2H), 7.47-7.39 (m, 5H), 7.36-7.25 (m, 4H), 7.24-7.20 (m, 1H), [5.47 (d, *J* = 0.9 Hz, 0.45H), 5.46 (d, *J* = 1.0 Hz, 0.55H)], 4.49-4.39 (m, 2H), [4.26 (s, 0.45H), 4.23 (s, 0.55H)], 2.05-1.80 (m, 2H), 1.16-1.13 (m, 6H), [0.95 (s, 4.95H), 0.69 (s, 4.05H)]. <sup>13</sup>C NMR (126 MHz, CDCl<sub>3</sub>) δ 213.4, 212.5, 196.2, 195.5, 166.6(0), 166.5(8), 141.0, 140.9, 138.5(2), 138.4(7), 132.8, 131.2, 131.0, 130.5, 130.4(5), 130.4(1), 129.5, 128.7, 128.5, 128.3(1), 128.2(6), 127.6(3), 127.5(5), 127.4(6), 126.5(2), 126.5(0), 111.5, 111.3, 108.7, 108.5, 62.3, 52.4, 51.7, 38.7, 38.3, 38.0, 36.8, 33.6, 33.3, 29.5, 29.1, 25.8, 25.4, 25.1, 24.9. HRMS (ESI) [M+H]<sup>+</sup>: calculated for

C<sub>33</sub>H<sub>37</sub>O<sub>3</sub>: 481.2743, found 481.2733.

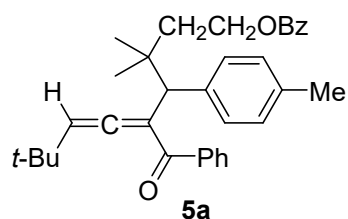

**5-Benzoyl-3,3,8,8-tetramethyl-4-(*p*-tolyl)nona-5,6-dien-1-yl benzoate (5a).** Flash column chromatography to afford product **5a** as a white solid (79.1 mg, 80% yield, dr = 30:70). Two diastereoisomers are hard to be separated by column chromatography on silica gel. <sup>1</sup>H NMR (500 MHz, CDCl<sub>3</sub>) δ 8.04-8.01 (m, 2H), 7.65-7.52 (m, 3H), 7.44-7.39 (m, 3H), 7.37-7.30 (m, 4H), 7.12-7.08 (m, 2H), [5.48 (d, *J* = 0.9 Hz, 0.24H), 5.46 (d, *J* = 1.0 Hz, 0.76H)], 4.50-4.41 (m, 2H), [4.22 (s, 0.24H), 4.18 (s, 0.76H)], [2.33 (s, 2.28H), 2.32 (s, 0.72H)], 2.06-1.82 (m, 2H), 1.17-1.13 (m, 6H), [0.95 (s, 6.84H), 0.73 (s, 2.16H)]. <sup>13</sup>C NMR (126 MHz, CDCl<sub>3</sub>) δ 213.3, 212.5, 196.2, 195.6, 166.6, 166.5, 138.5, 137.7, 136.0, 135.9, 132.7, 131.1, 131.0, 130.4(2), 130.4(0), 130.3(4), 130.2(8), 129.5, 128.6, 128.5, 128.3(4), 128.2(7), 128.2(3), 127.5, 127.4, 111.7, 111.4, 108.5, 108.3, 62.3, 52.0, 51.2, 38.6, 38.3, 37.9, 36.8, 33.6, 33.3, 29.5, 29.1, 25.7, 25.3, 25.0, 24.9, 20.9(6), 20.9(5). HRMS (ESI) [M+H]<sup>+</sup>: calculated for C<sub>34</sub>H<sub>39</sub>O<sub>3</sub>: 495.2899, found 495.2899.

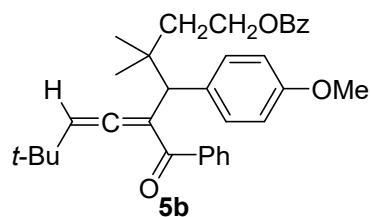

**5-Benzoyl-4-(4-methoxyphenyl)-3,3,8,8-tetramethylnona-5,6-dien-1-yl benzoate (5b).** Flash column chromatography to afford product **5b** as a white solid (86.7 mg, 85% yield, dr = 24:76). Two diastereoisomers are hard to be separated by column chromatography on silica gel. <sup>1</sup>H NMR (500 MHz, CDCl<sub>3</sub>) δ 8.03-8.00 (m, 2H), 7.64-7.51 (m, 3H), 7.44-7.29 (m, 7H), 6.85-6.81 (m, 2H), [5.47 (d, *J* = 0.9 Hz, 0.22H), 5.45 (d, *J* = 1.0 Hz, 0.78H)], 4.49-4.39 (m, 2H), [4.20 (s, 0.22H), 4.10 (s, 0.78H)], [3.79 (s, 2.34H), 3.79 (s, 0.66)], 2.25-1.80 (m, 2H), 1.15-1.12 (m, 6H), [0.94 (s, 7.02H), 0.71 (s, 1.98H)]. <sup>13</sup>C NMR (126 MHz, CDCl<sub>3</sub>) δ 213.3, 212.3, 196.2, 195.6, 166.5(9), 166.5(7), 158.1(8), 158.1(5), 138.5(5), 138.5(1), 133.0, 132.9, 132.7, 131.4, 131.3, 131.2, 131.0, 130.4(3), 130.4(2), 129.5, 128.7, 128.5, 128.3, 127.5, 127.4, 113.0, 112.9, 111.8, 111.5, 108.6, 108.4, 62.3, 55.2, 55.1, 51.6, 50.8, 38.6, 38.3, 38.0, 36.8, 33.6, 33.3, 29.5, 29.1, 25.7, 25.3, 25.0, 24.9. HRMS (ESI) [M+H]<sup>+</sup>: calculated for C<sub>34</sub>H<sub>39</sub>O<sub>4</sub>: 511.2848, found 511.2844.



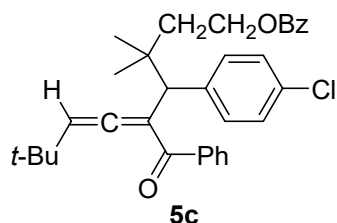

**5-Benzoyl-4-(4-chlorophenyl)-3,3,8,8-tetramethylnona-5,6-dien-1-yl benzoate (5c).** Flash column chromatography to afford product **5c** as a pale yellow solid (69.9 mg, 68% yield, dr = 40:60). Two diastereoisomers are hard to be separated by column chromatography on silica gel.  $^1\text{H}$  NMR (500 MHz,  $\text{CDCl}_3$ )  $\delta$  8.05-7.97 (m, 2H), 7.64-7.50 (m, 3H), 7.44-7.30 (m, 7H), 7.28-7.25 (m, 2H), [5.50 (d,  $J$  = 1.0 Hz, 0.26H), 5.47 (d,  $J$  = 1.0 Hz, 0.74H)], 4.49-4.41 (m, 2H), [ 4.25 (s, 0.26H), 4.19 (s, 0.74H)], 2.03-1.77 (m, 2H), 1.15-1.12 (m, 6H), [0.95 (s, 6.66H), 0.71 (s, 2.34H)].  $^{13}\text{C}$  NMR (126 MHz,  $\text{CDCl}_3$ )  $\delta$  213.1, 212.3, 195.9, 195.3, 166.5(3), 166.5(1), 139.5, 139.4, 138.2(8), 138.2(5), 132.8, 132.4, 132.3, 131.7, 131.6, 131.3, 131.1, 130.3(2), 130.3(0), 129.5, 128.6, 128.5, 128.3, 128.3, 127.8, 127.7, 127.6, 127.5, 111.1, 111.0, 109.0, 108.7, 62.1, 51.7, 50.9, 38.6, 38.3, 37.9, 36.7, 33.7, 33.3, 29.5, 29.1, 25.6, 25.3, 24.9, 24.8. HRMS (ESI)  $[\text{M}+\text{H}]^+$ : calculated for  $\text{C}_{33}\text{H}_{36}\text{O}_3\text{Cl}$ : 515.2353, found 515.2346.

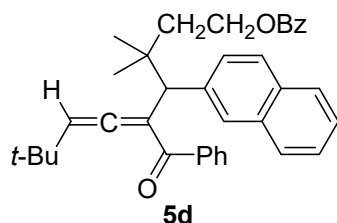

**5-Benzoyl-3,3,8,8-tetramethyl-4-(naphthalen-2-yl)nona-5,6-dien-1-yl benzoate (5d).** Flash column chromatography to afford product **5d** as a white solid (89.1 mg, 84% yield, dr = 44:56). Two diastereoisomers are hard to be separated by column chromatography on silica gel.  $^1\text{H}$  NMR (500 MHz,  $\text{CDCl}_3$ )  $\delta$  8.04-8.01 (m, 2H), 7.95-7.86 (m, 1H), 7.85-7.77 (m, 3H), 7.68-7.62 (m, 2H), 7.56-7.52 (m, 2H), 7.49-7.39 (m, 5H), 7.37-7.29 (m, 2H), [5.56 (s, 0.32H), 5.52 (s, 0.68H)], 4.54-4.41 (m, 3H), 2.12-1.88 (m, 2H), 1.24-1.21 (m, 6H), [1.00 (s, 6.12H), 0.71 (s, 2.88H)].  $^{13}\text{C}$  NMR (126 MHz,  $\text{CDCl}_3$ )  $\delta$  213.4, 212.5, 196.1, 195.6, 166.6, 138.5(4), 138.4(9), 138.5, 138.4, 133.0, 132.7, 132.3, 131.2, 131.1, 130.3(9), 130.3(6), 129.5, 129.3, 129.0, 128.7, 128.6, 128.5, 128.2, 127.9, 127.8, 127.5(5), 127.4(5), 127.4(1), 127.4(0), 127.0(1), 126.9(6), 125.8, 125.7, 125.5, 125.4, 111.5, 111.3, 108.8, 108.6, 62.2, 52.5, 51.7, 38.8, 38.5, 38.3, 37.1, 33.7, 33.3, 29.5, 29.1, 25.8, 25.5, 25.2, 25.1. HRMS (ESI)  $[\text{M}+\text{H}]^+$ : calculated for  $\text{C}_{37}\text{H}_{39}\text{O}_3$ : 531.2899, found 531.2892.

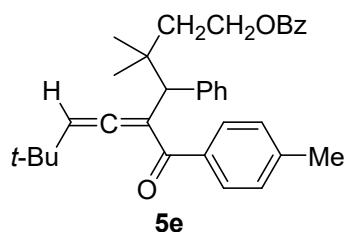

**3,3,8,8-Tetramethyl-5-(4-methylbenzoyl)-4-phenylnona-5,6-dien-1-yl benzoate**

**(5e).** Flash column chromatography to afford product **5e** as a white solid (67.2 mg, 68% yield, dr = 26:74). Two diastereoisomers are hard to be separated by column chromatography on silica gel. <sup>1</sup>H NMR (500 MHz, CDCl<sub>3</sub>) δ 8.05-8.00 (m, 2H), 7.62-7.40 (m, 7H), 7.30-7.26 (m, 2H), 7.24-7.20 (m, 1H), 7.16-7.11 (m, 2H), [5.48 (d, *J* = 1.0 Hz, 0.25H), 5.46 (d, *J* = 1.1 Hz, 0.75H)], 4.49-4.39 (m, 2H), [4.26 (s, 0.25H), 4.19 (s, 0.75H)], [2.37 (s, 0.75H), 2.35 (s, 2.25H)], 2.05-1.80 (m, 2H), 1.17-1.10 (m, 6H), [0.99 (s, 6.75H), 0.72 (s, 2.25H)]. <sup>13</sup>C NMR (126 MHz, CDCl<sub>3</sub>) δ 212.6, 211.6, 195.6, 194.9, 166.6, 142.0, 141.7, 141.0, 140.9, 135.5, 135.4, 132.8, 132.7, 130.5, 130.4(4), 130.4(1), 130.3(9), 129.5, 129.1, 128.9, 128.3, 128.2(3), 128.2(2), 128.1, 127.6, 126.5, 126.4, 111.3, 111.0, 108.4, 108.2, 62.3, 62.2, 52.7, 52.0, 38.7, 38.3, 38.0, 36.8, 33.6, 33.3, 29.6, 29.1, 25.9, 25.4, 25.1, 24.9, 21.4(9), 21.4(6). HRMS (ESI) [M+H]<sup>+</sup>: calculated for C<sub>34</sub>H<sub>39</sub>O<sub>3</sub>: 495.2899, found 495.2896.

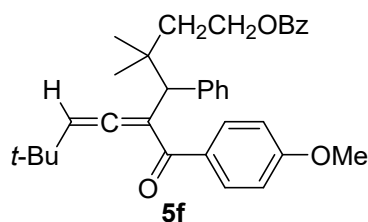

**5-(4-Methoxybenzoyl)-3,3,8,8-tetramethyl-4-phenylnona-5,6-dien-1-yl benzoate (5f).** Flash column chromatography to afford product **5f** as a white solid (66.3 mg, 65% yield, dr = 43:57). Two diastereoisomers are hard to be separated by column chromatography on silica gel. <sup>1</sup>H NMR (500 MHz, CDCl<sub>3</sub>) δ 8.02-7.99 (m, 2H), 7.76-7.60 (m, 2H), 7.55-7.51 (m, 1H), 7.47-7.39 (m, 4H), 7.29-7.19 (m, 3H), 6.87-6.80 (m, 2H), [5.48 (d, *J* = 0.9 Hz, 0.43H), 5.47 (d, *J* = 1.0 Hz, 0.57H)], 4.49-4.38 (m, 2H), [4.23 (s, 0.43H), 4.14 (s, 0.57H)], [3.83 (s, 1.29H), 3.81 (s, 1.71H)], 2.06-1.79 (m, 2H), 1.16-1.11 (m, 6H), [1.01 (s, 5.13H), 0.72 (s, 3.87H)]. <sup>13</sup>C NMR (126 MHz, CDCl<sub>3</sub>) δ 211.7, 210.7, 194.4, 193.7, 166.6, 162.5, 162.3, 141.1, 140.9, 132.7, 131.4, 131.3, 130.6, 130.5(3), 130.4(9), 130.4(5), 130.4(1), 129.5, 128.2, 127.6(1), 127.5(9), 126.5, 126.4, 112.8, 112.7, 111.0, 110.7, 108.3, 108.1, 62.2(8), 62.2(5), 55.4, 55.3, 53.2, 52.4, 38.7, 38.4, 38.0, 36.8, 33.6, 33.3, 29.7, 29.2, 26.0, 25.5, 25.1, 25.0. HRMS (ESI) [M+H]<sup>+</sup>: calculated for C<sub>34</sub>H<sub>39</sub>O<sub>4</sub>: 511.2848, found 511.2850.

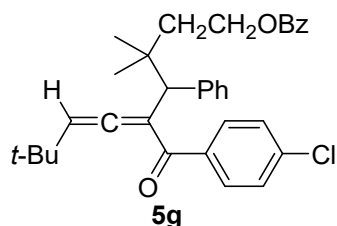

**5-(4-chlorobenzoyl)-3,3,8,8-tetramethyl-4-phenylnona-5,6-dien-1-yl benzoate (5g).** Flash column chromatography to afford product **5g** as a white solid (60.7 mg, 59% yield, dr = 53:47). Two diastereoisomers are hard to be separated by column chromatography on silica gel. <sup>1</sup>H NMR (500 MHz, CDCl<sub>3</sub>) δ 8.02-7.99 (m, 2H), 7.62-7.59 (m, 1H), 7.56-7.52 (m, 1H), 7.49-7.38 (m, 5H), 7.34-7.20 (m, 5H), [5.51 (d, *J* = 1.0 Hz, 0.53H), 5.50 (d, *J* = 1.0 Hz, 0.47H)], 4.48-4.38 (m, 2H), [4.23 (s, 0.53H), 4.16(s, 0.47H)], 2.04-1.79 (m, 2H), 1.15-1.11 (m, 6H), [0.98 (s, 4.23H), 0.72 (s,

4.77H)].  $^{13}\text{C}$  NMR (126 MHz,  $\text{CDCl}_3$ )  $\delta$  213.1, 212.2, 194.8, 194.1, 166.5(8), 166.5(6), 140.8, 140.7, 137.6, 137.3, 136.6(3), 136.5(9), 132.7(9), 132.7(8), 130.4(3), 130.4(0), 130.3(8), 130.2, 130.1, 129.5, 128.3, 127.9, 127.8, 127.7(0), 127.6(9), 126.6(2), 126.5(9), 111.4, 111.2, 108.9, 108.7, 62.2, 52.5, 51.8, 38.7, 38.3, 38.0, 36.8, 33.8, 33.4, 29.6, 29.1, 25.9, 25.4, 25.0(3), 24.9(8). HRMS (ESI)  $[\text{M}+\text{H}]^+$ : calculated for  $\text{C}_{33}\text{H}_{36}\text{O}_3\text{Cl}$ : 515.2353, found 515.2350.

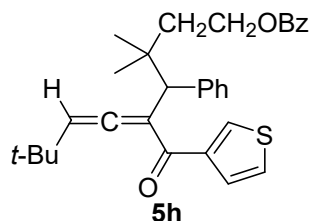

**3,3,8,8-Tetramethyl-4-phenyl-5-(thiophene-3-carbonyl)nona-5,6-dien-1-yl benzoate (5h).** Flash column chromatography to afford product **5h** as a white solid (65.2 mg, 67% yield, dr = 59:41). Two diastereoisomers are hard to be separated by column chromatography on silica gel.  $^1\text{H}$  NMR (500 MHz,  $\text{CDCl}_3$ )  $\delta$  8.02-7.99 (m, 2H), 7.96-7.81 (m, 1H), 7.56-7.52 (m, 1H), 7.46-7.33 (m, 5H), 7.29-7.17 (m, 4H), [5.61 (d,  $J$  = 1.0 Hz, 0.58H), 5.60 (d,  $J$  = 0.9 Hz, 0.42H)], 4.48-4.38 (m, 2H), [4.23 (s, 0.42H), 4.16 (s, 0.58H)], 2.05-1.78 (m, 2H), 1.15-1.07 (m, 6H), [1.07 (s, 5.22H), 0.78 (s, 3.78H)].  $^{13}\text{C}$  NMR (126 MHz,  $\text{CDCl}_3$ )  $\delta$  212.1, 211.2, 188.8, 188.0, 166.6, 141.0, 140.9, 140.8(2), 140.7(7), 132.7, 131.5, 131.3, 130.5, 130.4(3), 130.4(1), 129.5, 128.3(2), 128.2(8), 128.2(6), 127.6(5), 127.6(3), 126.5(2), 126.4(9), 124.8, 124.7, 112.0, 111.8, 108.9, 108.6, 62.3, 62.2, 52.7, 52.0, 38.7, 38.3, 38.0, 36.8, 33.8, 33.4, 29.6, 29.2, 26.0, 25.4, 25.0, 24.9. HRMS (ESI)  $[\text{M}+\text{H}]^+$ : calculated for  $\text{C}_{31}\text{H}_{35}\text{O}_3$ : 487.2307, found 487.2306.

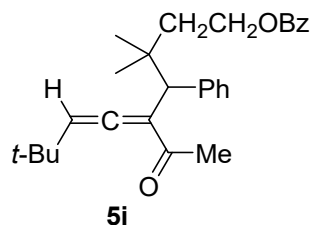

**5-Acetyl-3,3,8,8-tetramethyl-4-phenylnona-5,6-dien-1-yl benzoate (5i).** Flash column chromatography to afford product **5i** as a white solid (77.8 mg, 93% yield, dr = 62:38). Two diastereoisomers are hard to be separated by column chromatography on silica gel.  $^1\text{H}$  NMR (500 MHz,  $\text{CDCl}_3$ )  $\delta$  8.02-8.00 (m, 2H), 7.56-7.52 (m, 1H), 7.44-7.41 (m, 2H), 7.39-7.33 (m, 2H), 7.27-7.23 (m, 2H), 7.22-7.19 (m, 1H), [5.75 (s, 0.79H), 5.74 (d,  $J$  = 1.0 Hz, 0.21H)], 4.43-4.05 (m, 2H), [4.09 (s, 0.79H), 4.06 (s, 0.21H)], [2.26 (s, 2.37H), 2.25 (s, 0.63H)], 1.94-1.73 (m, 2H), [1.27 (s, 7.11H), 1.09 (s, 1.89H)], 1.07-1.02 (m, 6H).  $^{13}\text{C}$  NMR (126 MHz,  $\text{CDCl}_3$ )  $\delta$  211.6, 211.5, 198.3(4), 198.3(2), 166.6, 166.5, 141.3, 140.9, 132.7, 130.4(3), 130.4(1), 130.3, 129.5, 128.2, 127.6, 127.5, 126.4, 112.5, 112.4, 108.1, 107.7, 62.3, 62.2, 50.3, 50.1, 38.6, 38.2, 37.4, 36.6, 34.0, 33.7, 29.9, 29.5, 26.5, 26.4, 25.2, 25.1, 24.8. HRMS (ESI)  $[\text{M}+\text{H}]^+$ : calculated for  $\text{C}_{28}\text{H}_{35}\text{O}_3$ : 419.2586, found 419.2586.

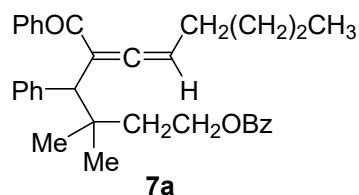

**5-Benzoyl-3,3-dimethyl-4-phenylundeca-5,6-dien-1-yl benzoate (7a).** Flash column chromatography to afford product **7a** as a pale yellow solid (78.8 mg, 82% yield, dr = 36:64). Two diastereoisomers are hard to be separated by column chromatography on silica gel. <sup>1</sup>H NMR (500 MHz, CDCl<sub>3</sub>) δ 8.03-7.99 (m, 2H), 7.64-7.60 (m, 2H), 7.56-7.53 (m, 1H), 7.46-7.41 (m, 5H), 7.35-7.28 (m, 4H), 7.24-7.21 (m, 1H), [5.50 (t, *J* = 7.4 Hz, 0.41H), 5.46 (t, *J* = 7.6 Hz, 0.59H)], 4.48-4.39 (m, 2H), [4.16 (s, 0.41H), 4.15 (s, 0.59H)], 2.28-2.03 (m, 2H), 2.02-1.82 (m, 2H), 1.37-1.16 (m, 4H), 1.14-1.12 (m, 6H), 0.83-0.77 (m, 3H). <sup>13</sup>C NMR (126 MHz, CDCl<sub>3</sub>) δ 214.6, 214.5, 195.6(5), 195.5(8), 166.6, 166.5, 140.9, 140.7, 138.5(2), 138.4(6), 132.8, 131.5, 130.4(2), 130.4(1), 130.3(3), 130.2(9), 129.5, 128.9, 128.3, 127.6(7), 127.6(5), 127.6(0), 126.5(0), 126.4(8), 108.8, 108.3, 97.2, 96.8, 62.3, 62.2, 52.1(0), 52.0(7), 38.5(1), 38.4(8), 37.4, 37.0, 30.9, 30.7, 28.6, 28.4, 25.4, 25.3, 25.2, 22.1, 13.7. HRMS (ESI) [M+Na]<sup>+</sup>: calculated for C<sub>33</sub>H<sub>36</sub>O<sub>3</sub>Na: 503.2562, found 503.2561.

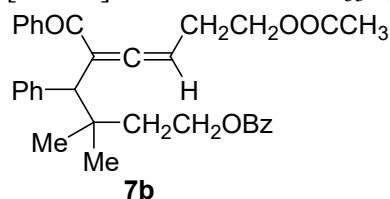

**9-Acetoxy-5-benzoyl-3,3-dimethyl-4-phenylnona-5,6-dien-1-yl benzoate (7b).** Flash column chromatography to afford product **7b** a pale yellow oil (74.5 mg, 73% yield, dr = 34:66). Two diastereoisomers are hard to be separated by column chromatography on silica gel. <sup>1</sup>H NMR (500 MHz, CDCl<sub>3</sub>) δ 8.03-8.01 (m, 2H), 7.66-7.64 (m, 2H), 7.56-7.52 (m, 1H), 7.47-7.40 (m, 5H), 7.37-7.34 (m, 2H), 7.32-7.28 (m, 2H), 7.26-7.21 (m, 1H), [5.54 (t, *J* = 7.3 Hz, 0.41H), 5.49 (t, *J* = 7.5 Hz, 0.59H)], 4.49-4.40 (m, 2H), [4.16 (s, 0.41H), 4.15 (s, 0.59H)], 4.12-3.88 (m, 2H), 2.61-2.35 (m, 2H), 2.10-1.83 (m, 5H), 1.15-1.12 (m, 6H). <sup>13</sup>C NMR (126 MHz, CDCl<sub>3</sub>) δ 214.7, 214.6, 195.0, 194.9, 170.7, 166.4(7), 166.4(5), 140.5, 140.4, 138.1, 138.0, 132.7(3), 132.7(1), 131.8(2), 131.8(1), 130.3(2), 130.3(0), 130.2, 129.4, 128.8(8), 128.8(6), 128.2, 127.6(9), 127.6(7), 127.7, 126.6(0), 126.5(8), 109.1, 108.7, 93.2, 92.9, 62.7, 62.6, 62.1(2), 62.0(9), 52.3, 52.2, 38.6, 38.5, 37.4, 37.0, 28.4, 28.2, 25.3, 25.2(2), 25.2(0), 25.1, 20.6(9), 20.6(6). HRMS (ESI) [M+Na]<sup>+</sup>: calculated for C<sub>33</sub>H<sub>34</sub>O<sub>5</sub>Na: 533.2304, found 533.2299.

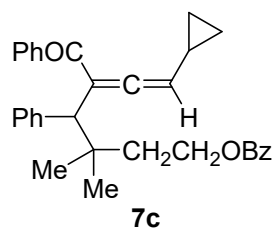

**5-Benzoyl-7-cyclopropyl-3,3-dimethyl-4-phenylhepta-5,6-dien-1-yl benzoate (7c).**

Flash column chromatography to afford product **7c** as a pale yellow oil (60.4 mg, 65% yield, dr = 33:67). Two diastereoisomers are hard to be separated by column chromatography on silica gel.  $^1\text{H}$  NMR (500 MHz,  $\text{CDCl}_3$ )  $\delta$  8.04-8.02 (m, 2H), 7.69-7.66 (m, 2H), 7.56-7.53 (m, 1H), 7.48-7.41 (m, 5H), 7.37-7.28 (m, 4H), 7.24-7.21 (m, 1H), [5.27 (d,  $J = 8.2$  Hz, 0.35H), 5.19 (d,  $J = 8.3$  Hz, 0.65H)], 4.50-4.40 (m, 2H), [4.19 (s, 0.35H), 4.18 (s, 0.65H)], 2.04-1.83 (m, 2H), 1.53-1.37 (m, 1H), 1.17-1.12 (m, 6H), 0.81-0.67 (m, 2H), 0.35-0.22 (m, 2H).  $^{13}\text{C}$  NMR (126 MHz,  $\text{CDCl}_3$ )  $\delta$  215.1, 214.9, 195.1(4), 195.0(9), 166.5(4), 166.5(2), 140.9, 140.6, 138.2(3), 138.1(8), 132.7(3), 132.7(1), 131.5(9), 131.5(8), 130.4, 130.3, 129.4(7), 129.4(6), 129.0(1), 129.0(0), 128.2, 127.6(5), 127.6(3), 127.5(7), 126.5, 110.1, 109.7, 101.3, 101.0, 62.3, 52.2(9), 52.2(5), 38.5(3), 38.4(9), 37.4, 37.1, 25.4, 25.3, 25.2, 25.1, 9.8, 9.6, 6.4, 6.3, 5.9, 5.8. HRMS (ESI)  $[\text{M}+\text{Na}]^+$ : calculated for  $\text{C}_{32}\text{H}_{32}\text{O}_3\text{Na}$ : 487.2249, found 487.2245.

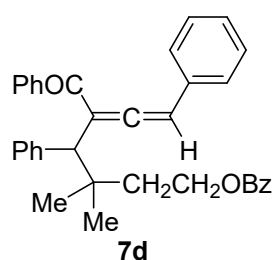

**5-Benzoyl-3,3-dimethyl-4,7-diphenylhepta-5,6-dien-1-yl benzoate (7d).** Flash column chromatography to afford product **7d** as a pale yellow solid (63.0 mg, 63% yield, dr = 43:57). Two diastereoisomers are hard to be separated by column chromatography on silica gel.  $^1\text{H}$  NMR (500 MHz,  $\text{CDCl}_3$ )  $\delta$  8.02-7.96 (m, 2H), 7.72-7.68 (m, 2H), 7.56-7.46 (m, 3H), 7.44-7.36 (m, 3H), 7.33-7.22 (m, 9H), 7.15-7.13 (m, 1H), [6.63 (s, 0.54H), 6.59 (s, 0.46H)], 4.49-4.39 (m, 2H), 4.30 (s, 1H), 2.03-1.87 (m, 2H), 1.18-1.12 (m, 6H).  $^{13}\text{C}$  NMR (126 MHz,  $\text{CDCl}_3$ )  $\delta$  216.4, 215.1, 194.3, 194.2, 166.6, 166.5, 140.4, 140.3, 137.9, 137.8, 132.8, 132.7, 132.2, 132.1(2), 132.0(6), 132.0(4), 130.3(8), 130.3(7), 130.3(5), 129.5, 128.9(4), 128.8(8), 128.8(2), 128.7(6), 128.3, 128.2, 127.9(0), 127.8(7), 127.8(1), 127.8(0), 127.7(7), 127.5, 127.4, 126.7(4), 126.7(0), 112.4, 111.8, 100.6, 100.2, 62.2, 62.1, 53.9, 53.6, 38.7, 38.6, 37.7, 37.1, 25.5, 25.3, 25.2(5), 25.2(0). HRMS (ESI)  $[\text{M}+\text{Na}]^+$ : calculated for  $\text{C}_{35}\text{H}_{32}\text{O}_3\text{Na}$ : 523.2249, found 523.2247.

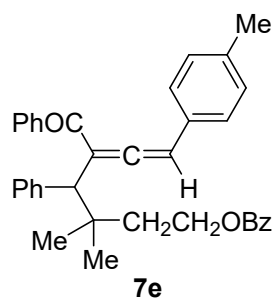

**5-Benzoyl-3,3-dimethyl-4-phenyl-7-(p-tolyl)hepta-5,6-dien-1-yl benzoate (7e).** Flash column chromatography to afford product **7e** as a pale yellow solid (60.1 mg, 59% yield, dr = 52:48). Two diastereoisomers are hard to be separated by column

chromatography on silica gel.  $^1\text{H}$  NMR (500 MHz,  $\text{CDCl}_3$ )  $\delta$  8.03-7.97 (m, 2H), 7.72-7.68 (m, 2H), 7.56-7.53 (m, 1H), 7.49-7.46 (m, 2H), 7.44-7.36 (m, 3H), 7.33-7.30 (m, 1H), 7.28-7.20 (m, 5H), 7.14-7.10 (m, 2H), 7.06-7.04 (m, 1H), [6.61(s, 0.49H), 6.57 (s, 0.51H)], 4.48-4.41 (m, 2H), 4.30 (s, 1H), [2.34 (s, 1.47H), 2.31(s, 1.53H)], 2.03-1.87 (m, 2H), 1.18-1.12 (m, 6H).  $^{13}\text{C}$  NMR (126 MHz,  $\text{CDCl}_3$ )  $\delta$  216.4, 215.1, 194.4, 194.3, 166.6, 166.5, 140.5, 140.4, 137.8(5), 137.8(3), 137.7(5), 132.7(5), 132.7(1), 132.0(2), 131.9(7), 130.4(2), 130.3(9), 130.3(7), 129.7, 129.5, 129.2, 129.0, 128.9, 128.8, 128.3, 128.2, 127.9, 127.7(7), 127.7(6), 127.7(3), 127.4, 127.3, 126.6(9), 126.6(5), 112.4, 111.8, 100.4, 100.1, 62.2, 62.1, 53.8, 53.5, 38.6, 37.7, 37.0, 25.6, 25.4, 25.2(0), 25.1(6), 21.2(3), 21.1(9). HRMS (ESI)  $[\text{M}+\text{H}]^+$ : calculated for  $\text{C}_{36}\text{H}_{35}\text{O}_3$ : 515.2586, found 515.2582.

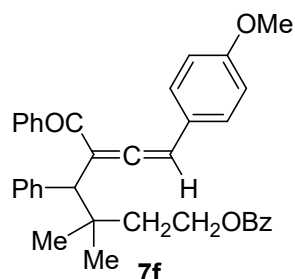

**5-Benzoyl-7-(4-methoxyphenyl)-3,3-dimethyl-4-phenylhepta-5,6-dien-1-yl benzoate (7f).** Flash column chromatography to afford product **7f** as a white solid (75.3 mg, 71% yield, dr = 45:55). Two diastereoisomers are hard to be separated by column chromatography on silica gel.  $^1\text{H}$  NMR (500 MHz,  $\text{CDCl}_3$ )  $\delta$  8.03-7.98 (m, 2H), 7.72-7.68 (m, 2H), 7.56-7.53 (m, 1H), 7.49-7.47 (m, 2H), 7.44-7.37 (m, 3H), 7.34-7.30 (m, 1H), 7.28-7.23 (m, 5H), 7.09-7.08 (m, 1H), 6.88-6.83 (m, 2H), [6.60 (d,  $J = 1.0$  Hz, 0.42H), 6.56 (d,  $J = 1.0$  Hz, 0.58H)], 4.50-4.41 (m, 2H), 4.30 (s, 1H), [3.81 (s, 1.26H), 3.76 (s, 1.74H)], 2.03-1.88 (m, 2H), 1.18-1.13 (m, 6H).  $^{13}\text{C}$  NMR (126 MHz,  $\text{CDCl}_3$ )  $\delta$  216.3, 214.9, 194.5, 194.4, 166.6, 166.5, 159.4, 159.3, 140.6, 140.4, 138.0, 137.9, 132.7(4), 132.7(2), 132.0, 131.9, 130.3(9), 130.3(7), 130.3(6), 129.5, 128.8(5), 128.7(9), 128.7(4), 128.6, 128.3, 128.2, 127.9, 127.8, 127.7(5), 127.7(4), 126.7, 126.6, 124.4, 124.2, 114.5, 114.3, 112.4, 111.8, 100.0, 99.7, 62.2(3), 62.1(5), 55.3, 55.2, 53.7, 53.4, 38.6(3), 38.6(1), 37.7, 37.0, 25.6, 25.3, 25.2(2), 25.1(6). HRMS (ESI)  $[\text{M}+\text{H}]^+$ : calculated for  $\text{C}_{36}\text{H}_{35}\text{O}_4$ : 531.2535, found 531.2544

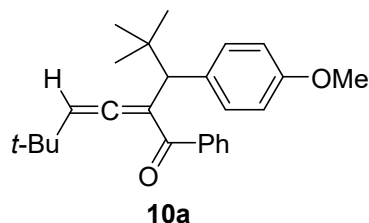

**2-(1-(4-Methoxyphenyl)-2,2-dimethylpropyl)-5,5-dimethyl-1-phenylhexa-2,3-dien-1-one (10a).** Flash column chromatography to afford product **10a** as a white solid (60.2 mg, 80% yield, dr = 14:86). Two diastereoisomers are hard to be separated by column chromatography on silica gel.  $^1\text{H}$  NMR (500 MHz,  $\text{CDCl}_3$ )  $\delta$  7.64-7.51 (m, 2H), 7.43-7.38 (m, 1H), 7.37-7.29 (m, 4H), 6.83-6.78 (m, 2H), [5.43 (d,  $J = 0.9$  Hz, 0.38H), 5.40 (d,  $J = 1.1$  Hz, 0.62H)], [4.08 (s, 0.38H), 4.03 (s, 0.62H)], [3.79 (s,

1.86H), 3.78 (s, 1.14H)], [1.03 (s, 5.58H), 1.00 (s, 3.42H), 0.95 (s, 5.58H), 0.70 (s, 3.42H)]. <sup>13</sup>C NMR (126 MHz, CDCl<sub>3</sub>) δ 213.2, 212.4, 196.5, 195.8, 157.98, 157.96, 138.8, 138.7, 134.0, 133.9, 131.2, 131.1(1), 131.0(9), 130.9, 128.7, 128.5, 127.5, 127.4, 112.8, 112.7, 112.3, 112.2, 108.4, 108.1, 55.1(3), 55.1(2), 51.8, 51.2, 36.1, 34.9, 33.6, 33.2, 29.5, 29.1, 28.4, 28.3. HRMS (ESI) [M+H]<sup>+</sup>: calculated for C<sub>26</sub>H<sub>33</sub>O<sub>2</sub>: 377.2481, found 377.2486.

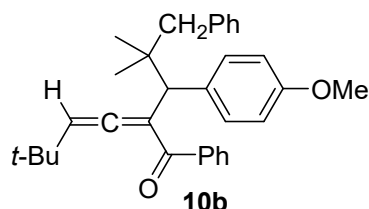

**2-(1-(4-methoxyphenyl)-2,2-dimethyl-3-phenylpropyl)-5,5-dimethyl-1-phenylhexa-2,3-dien-1-one (10b).** Flash column chromatography to afford product **10b** as a pale yellow solid (73.3 mg, 81% yield, dr = 38:62). Two diastereoisomers are hard to be separated by column chromatography on silica gel. <sup>1</sup>H NMR (500 MHz, CDCl<sub>3</sub>) δ 7.67-7.54 (m, 2H), 7.46-7.31 (m, 5H), 7.27-7.17 (m, 3H), 7.12-7.09 (m, 2H), 6.86-6.83 (m, 2H), [5.50 (s, 0.62H), 5.48 (d, *J* = 1.0 Hz, 0.38H)], [4.23 (s, 0.62H), 4.19 (s, 0.38H)], 3.81 (s, 3H), 2.81-2.65 (m, 2H), [1.01-0.91 (m, 9.42H), 0.76 (s, 5.58H)]. <sup>13</sup>C NMR (126 MHz, CDCl<sub>3</sub>) δ 213.3, 212.5, 196.4, 195.7, 158.1(0), 158.0(9), 139.1, 139.0, 138.7, 138.6, 133.4, 133.3, 131.6, 131.5, 131.2, 130.9(5), 130.9(0), 130.8(8), 128.7, 128.5, 127.6, 127.5, 127.4, 125.7, 112.9(5), 112.8(7), 112.1, 111.9, 108.5, 108.3, 55.1(5), 55.1(3), 52.3, 51.7, 46.4, 46.1, 39.7, 38.6, 33.6, 33.3, 29.6, 29.1, 24.7, 24.6, 24.3, 23.9. HRMS (ESI) [M+H]<sup>+</sup>: calculated for C<sub>32</sub>H<sub>37</sub>O<sub>2</sub>: 453.2794, found 453.2788.

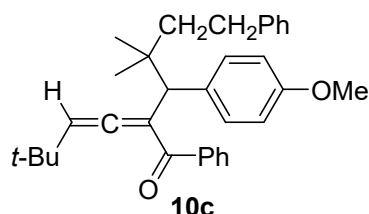

**2-(1-(4-Methoxyphenyl)-2,2-dimethyl-4-phenylbutyl)-5,5-dimethyl-1-phenylhexa-2,3-dien-1-one (10c).** Flash column chromatography to afford product **10c** as a pale yellow solid (69.0 mg, 74% yield, dr = 25:75). Two diastereoisomers are hard to be separated by column chromatography on silica gel. <sup>1</sup>H NMR (500 MHz, CDCl<sub>3</sub>) δ 7.66-7.51 (m, 2H), 7.46-7.39 (m, 2H), 7.37-7.30 (m, 3H), 7.27-7.22 (m, 2H), 7.17-7.09 (m, 3H), 6.84-6.81 (m, 2H), [5.43 (d, *J* = 0.9 Hz, 0.45H), 5.42 (d, *J* = 1.0 Hz, 0.55H)], [4.28 (s, 0.45H), 4.22 (s, 0.55H)], 3.80 (s, 3H), 2.73-2.58 (m, 2H), 1.83-1.55 (m, 2H), 1.14-1.09 (m, 6H), [0.93 (s, 4.95H), 0.72 (s, 4.05H)]. <sup>13</sup>C NMR (126 MHz, CDCl<sub>3</sub>) δ 213.3, 212.5, 196.4, 195.7, 158.0(4), 158.0(2), 143.3, 143.3, 138.7, 138.6, 133.5, 133.4, 131.3(4), 131.2(7), 131.2, 130.9, 128.7, 128.5, 128.4, 128.3, 128.2, 127.5, 127.4, 125.4, 112.9, 112.8, 112.1, 111.9, 108.4, 108.2, 55.1(4), 55.1(1), 50.6, 49.5, 43.4, 42.8, 38.7, 37.6, 33.6, 33.2, 30.6(3), 30.5(6), 29.5, 29.1, 25.6, 25.4, 25.1, 24.9. HRMS (ESI) [M+H]<sup>+</sup>: calculated for C<sub>33</sub>H<sub>39</sub>O<sub>2</sub>: 467.2950, found 467.2947.

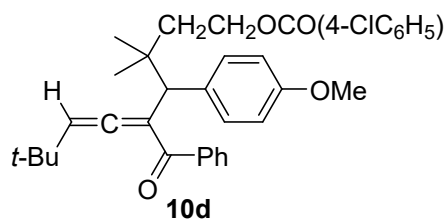

**5-Benzoyl-4-(4-methoxyphenyl)-3,3,8,8-tetramethylnona-5,6-dien-1-yl 4-chlorobenzoate (10d).** Flash column chromatography to afford product **10d** as a white solid (66.4 mg, 61% yield, dr = 33:67). Two diastereoisomers are hard to be separated by column chromatography on silica gel.  $^1\text{H}$  NMR (500 MHz,  $\text{CDCl}_3$ )  $\delta$  7.95-7.92 (m, 2H), 7.63-7.50 (m, 2H), 7.44-7.29 (m, 7H), 6.85-6.80 (m, 2H), [5.46 (s, 0.37H), 5.45 (d,  $J = 0.9$  Hz, 0.63H)], 4.47-4.38 (m, 2H), [4.20 (s, 0.37), 4.14 (s, 0.63H)], [3.79 (s, 1.89H), 3.78 (s, 1.11H)], 2.01-1.78 (m, 2H), 1.16-1.09 (m, 6H), [0.94 (s, 5.67H), 0.71 (s, 3.33H)].  $^{13}\text{C}$  NMR (126 MHz,  $\text{CDCl}_3$ )  $\delta$  213.3, 212.3, 196.2, 195.6, 165.7(2), 165.7(0), 158.2(0), 158.1(7), 139.2, 138.4(9), 138.4(8), 133.0, 132.8, 131.4, 131.3, 131.2, 131.0, 130.9, 128.8(7), 128.8(5), 128.7, 128.6, 128.5, 127.5(4), 127.4(5), 113.0(4), 112.9(6), 111.7, 111.5, 108.6, 108.4, 62.6, 55.2, 55.1, 51.5, 50.6, 38.7, 38.3, 38.0, 36.8, 33.6, 33.3, 29.5, 29.1, 25.7, 25.3, 25.0, 24.9. HRMS (ESI)  $[\text{M}+\text{Na}]^+$ : calculated for  $\text{C}_{34}\text{H}_{37}\text{ClO}_4\text{Na}$ : 567.2278, found 567.2279.

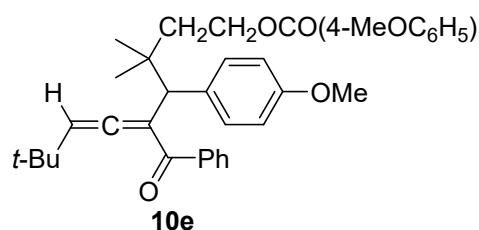

**5-Benzoyl-4-(4-methoxyphenyl)-3,3,8,8-tetramethylnona-5,6-dien-1-yl 4-methoxybenzoate (10e).** Flash column chromatography to afford product **10e** as a pale yellow solid (97.3 mg, 90% yield, dr = 38:62). Two diastereoisomers are hard to be separated by column chromatography on silica gel.  $^1\text{H}$  NMR (500 MHz,  $\text{CDCl}_3$ )  $\delta$  7.98-7.95 (m, 2H), 7.64-7.51 (m, 2H), 7.43-7.29 (m, 5H), 6.91-6.80 (m, 2H), 6.85-6.79 (m, 2H), [5.46 (s, 0.40H), 5.44 (s, 0.60H)], 4.45-4.36 (m, 2H), [4.20 (s, 0.40H), 4.14 (s, 0.60H)], 3.84-3.76 (m, 6H), 1.99-1.80 (m, 2H), 1.14-1.11 (m, 6H), [0.94 (s, 5.40H), 0.71 (s, 3.60H)].  $^{13}\text{C}$  NMR (126 MHz,  $\text{CDCl}_3$ )  $\delta$  213.2, 212.3, 196.2, 195.6, 166.3(1), 166.2(9), 163.2, 158.2, 158.1, 138.5(5), 138.5(1), 133.1, 132.9, 131.5, 131.4, 131.3, 131.2, 131.0, 128.7, 128.5, 127.5, 127.4, 122.8(8), 122.8(6), 113.5(3), 113.4(8), 113.0, 112.9, 111.8, 111.5, 108.6, 108.4, 61.9, 55.3, 55.1(2), 55.1(0), 51.6, 50.8, 38.7, 38.3, 38.0, 36.8, 33.6, 33.2, 29.5, 29.1, 25.7, 25.3, 25.0, 24.9. HRMS (ESI)  $[\text{M}+\text{Na}]^+$ : calculated for  $\text{C}_{35}\text{H}_{40}\text{O}_5\text{Na}$ : 563.2773, found 563.2772.



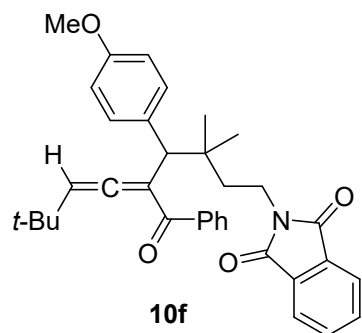

**2-(5-Benzoyl-4-(4-methoxyphenyl)-3,3,8,8-tetramethylnona-5,6-dien-1-yl)isoindoline-1,3-dione (10f).** Flash column chromatography to afford product **10f** as a white solid (92.1 mg, 86% yield, dr = 62:38). Two diastereoisomers are hard to be separated by column chromatography on silica gel.  $^1\text{H}$  NMR (500 MHz,  $\text{CDCl}_3$ )  $\delta$  7.81-7.77 (m, 2H), 7.67-7.64 (m, 2H), 7.62-7.50 (m, 2H), 7.43-7.28 (m, 5H), 6.82-6.79 (m, 2H), [5.48 (d,  $J$  = 1.1 Hz, 0.62H), 5.43 (s, 0.38H)], [4.18 (s, 0.62H), 4.15 (s, 0.38H)], 3.82-3.66 (m, 5H), 1.83-1.60 (m, 2H), 1.15-1.11 (m, 6H), [0.93 (s, 3.42H), 0.73 (s, 5.58H)].  $^{13}\text{C}$  NMR (126 MHz,  $\text{CDCl}_3$ )  $\delta$  213.2, 212.6, 196.2, 195.7, 168.1, 168.0, 158.1(0), 158.0(7), 138.6(4), 138.6(0), 133.7, 132.8(3), 132.7(5), 132.2(0), 132.1(8), 131.4, 131.2, 131.0, 130.8, 128.6, 128.5, 127.4, 127.3, 122.9(7), 122.9(6), 113.0, 112.9, 111.7, 111.5, 108.5, 108.4, 55.0(6), 55.0(5), 50.8, 50.1, 38.6, 38.5, 37.9, 36.9, 34.3, 34.2, 33.6, 33.2, 29.5, 29.1, 25.0, 24.9, 24.5. HRMS (ESI)  $[\text{M}+\text{H}]^+$ : calculated for  $\text{C}_{35}\text{H}_{38}\text{NO}_4$ : 536.2801, found 536.2796.

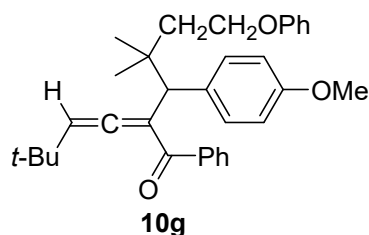

**2-(1-(4-Methoxyphenyl)-2,2-dimethyl-4-phenoxybutyl)-5,5-dimethyl-1-phenylhexa-2,3-dien-1-one (10g).** Flash column chromatography to afford product **10g** as a colorless oil (76.2 mg, 79% yield, dr = 39:61). Two diastereoisomers are hard to be separated by column chromatography on silica gel.  $^1\text{H}$  NMR (500 MHz,  $\text{CDCl}_3$ )  $\delta$  7.66-7.53 (m, 2H), 7.45-7.26 (m, 7H), 6.95-6.83 (m, 5H), 5.47 (s, 1H), [4.24 (s, 0.67H), 4.18 (s, 0.33H)], 4.12-4.03 (m, 2H), 3.80 (s, 3H), 2.10-1.85 (m, 2H), 1.16-1.09 (m, 6H), [0.97 (s, 2.97H), 0.74 (s, 6.03H)].  $^{13}\text{C}$  NMR (126 MHz,  $\text{CDCl}_3$ )  $\delta$  213.2, 212.3, 196.2, 195.6, 159.0, 158.9, 158.1(5), 158.1(3), 138.6, 138.5, 133.1, 133.0, 131.4, 131.3, 131.2, 131.0, 129.3, 128.7, 128.5, 127.5, 127.4, 120.4(0), 120.3(7), 114.5, 113.0, 112.9, 111.8, 111.6, 108.5, 108.3, 64.8, 64.7, 55.1(2), 55.1(0), 51.3, 50.6, 39.1, 38.9, 37.9, 36.8, 33.6, 33.2, 29.5, 29.1, 25.8, 25.6, 25.2(4), 25.1(8). HRMS (ESI)  $[\text{M}+\text{H}]^+$ : calculated for  $\text{C}_{33}\text{H}_{39}\text{O}_3$ : 483.2899, found 483.2896.

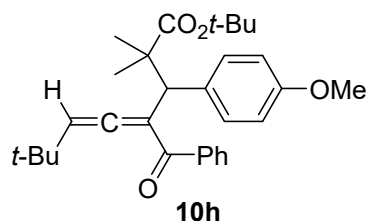

**tert-Butyl 4-benzoyl-3-(4-methoxyphenyl)-2,2,7,7-tetramethylocta-4,5-dienoate (10h).** Flash column chromatography to afford product **10h** as a pale yellow oil (84.1 mg, 91% yield, dr = 25:75). Two diastereoisomers are hard to be separated by column chromatography on silica gel.  $^1\text{H}$  NMR (500 MHz,  $\text{CDCl}_3$ )  $\delta$  7.62-7.52 (m, 2H), 7.43-7.29 (m, 5H), 6.82-6.79 (m, 2H), [5.44 (s, 0.32H), 5.40 (d,  $J = 1.6$  Hz, 0.68H)], [4.65 (s, 0.32H), 4.58 (s, 0.68H)], [3.77 (s, 0.96H), 3.76 (s, 2.04H)], [1.40 (s, 2.88H), 1.36 (s, 6.12H)], 1.21-1.18 (m, 6H), [0.96 (s, 2.88H), 0.80 (s, 6.12H)].  $^{13}\text{C}$  NMR (126 MHz,  $\text{CDCl}_3$ )  $\delta$  212.5, 212.3, 195.3, 194.9, 176.1, 176.0, 158.2(8), 158.2(7), 138.7, 138.6, 132.3, 132.0, 131.3(7), 131.3(5), 131.1, 130.9, 128.6, 128.5, 127.4(4), 127.3(7), 112.9(4), 112.9(1), 111.7, 111.6, 108.8, 108.5, 80.1, 80.0, 55.1(3), 55.1(0), 47.9, 47.4, 47.3, 47.1, 33.4, 33.2, 29.4, 29.2, 28.0, 27.9, 25.5, 25.2, 22.2, 21.9. HRMS (ESI)  $[\text{M}+\text{Na}]^+$ : calculated for  $\text{C}_{30}\text{H}_{38}\text{O}_4\text{Na}$ : 485.2668, found 485.2663.

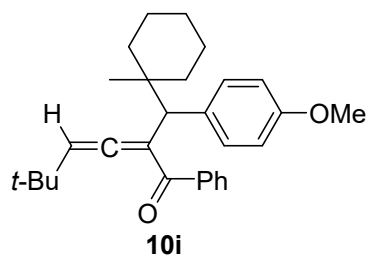

**2-((4-Methoxyphenyl)(1-methylcyclohexyl)methyl)-5,5-dimethyl-1-phenylhexa-2,3-dien-1-one (10i).** Flash column chromatography to afford product **10i** (76.6 mg, 92% yield, dr = 42:58).

The first fraction: colorless oil.  $^1\text{H}$  NMR (500 MHz,  $\text{CDCl}_3$ )  $\delta$  7.65-7.63 (m, 2H), 7.45-7.41 (m, 1H), 7.38-7.33 (m, 4H), 6.80-6.77 (m, 2H), 5.41 (d,  $J = 0.8$  Hz, 1H), 4.15 (s, 1H), 3.78 (s, 3H), 1.55-1.40 (m, 6H), 1.36-1.26 (m, 2H), 1.22-1.17 (m, 2H), 1.06 (s, 3H), 0.68 (s, 9H).  $^{13}\text{C}$  NMR (126 MHz,  $\text{CDCl}_3$ )  $\delta$  213.6, 195.7, 157.9, 138.6, 133.5, 131.5, 131.1, 128.8, 127.5, 112.7, 111.9, 108.3, 55.1, 51.2, 38.7, 37.0, 36.2, 33.2, 29.1, 26.2, 22.0, 20.4. HRMS (ESI)  $[\text{M}+\text{H}]^+$ : calculated for  $\text{C}_{29}\text{H}_{37}\text{O}_2$ : 417.2794, found 417.2789.

The second fraction: white solid.  $^1\text{H}$  NMR (500 MHz,  $\text{CDCl}_3$ )  $\delta$  7.53-7.51 (m, 2H), 7.42-7.38 (m, 1H), 7.32-7.29 (m, 4H), 6.83-6.80 (m, 2H), 5.37 (s, 1H), 4.11 (s, 1H), 3.79 (s, 3H), 1.60-1.49 (m, 6H), 1.43-1.34 (m, 2H), 1.29-1.20 (m, 2H), 1.05 (s, 3H), 0.95 (s, 9H).  $^{13}\text{C}$  NMR (126 MHz,  $\text{CDCl}_3$ )  $\delta$  212.6, 196.5, 158.0, 138.9, 133.4, 131.4, 130.9, 128.6, 127.4, 112.8, 111.7, 107.7, 55.1, 51.9, 37.4, 36.7, 35.7, 33.5, 29.6, 26.2, 21.9(2), 21.8(7), 20.4. HRMS (ESI)  $[\text{M}+\text{H}]^+$ : calculated for  $\text{C}_{29}\text{H}_{37}\text{O}_2$ : 417.2794, found 417.2790.

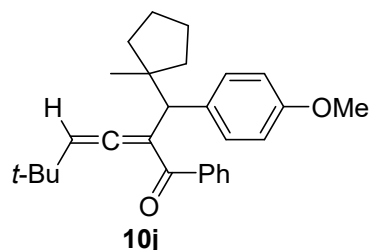

**2-((4-Methoxyphenyl)(1-methylcyclopentyl)methyl)-5,5-dimethyl-1-phenylhexa-2,3-dien-1-one (10j).** Flash column chromatography to afford product **10j** as a pale yellow oil (59.5 mg, 74% yield, dr = 60:40). Two diastereoisomers are hard to be separated by column chromatography on silica gel.  $^1\text{H}$  NMR (500 MHz,  $\text{CDCl}_3$ )  $\delta$  7.64-7.62 (m, 2H), 7.45-7.39 (m, 1H), 7.37-7.29 (m, 4H), 6.82-6.78 (m, 2H), 5.40 (s, 1H), [4.20 (s, 0.62H), 4.15 (s, 0.38H)], 3.78 (s, 3H), 1.79-1.21 (m, 8H), [1.07 (s, 1.14H), 1.04 (s, 1.86H)], [0.92 (s, 3.42H), 0.71 (s, 5.58H)].  $^{13}\text{C}$  NMR (126 MHz,  $\text{CDCl}_3$ )  $\delta$  213.1, 212.1, 196.4, 195.8, 157.9, 157.9, 138.8, 138.7, 134.7, 134.4, 131.2, 131.0, 130.9(2), 130.8(7), 128.7, 128.6, 127.5, 127.4, 112.9(3), 112.8(8), 112.7, 112.5, 108.2(5), 108.1(7), 55.2, 55.1, 51.2, 50.6, 47.6, 46.7, 39.0, 38.9, 38.0, 37.3, 33.5, 33.2, 29.5, 29.2, 24.3, 24.2, 24.0, 23.9, 23.8. HRMS (ESI)  $[\text{M}+\text{H}]^+$ : calculated for  $\text{C}_{28}\text{H}_{35}\text{O}_2$ : 403.2637, found 403.2637.

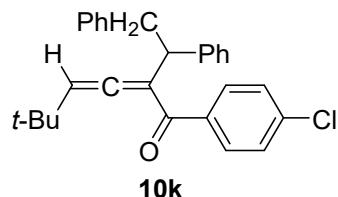

**1-(4-Chlorophenyl)-2-(1,2-diphenylethyl)-5,5-dimethylhexa-2,3-dien-1-one (10k).** Flash column chromatography to afford product **10k** as a white solid (44.7 mg, 54% yield, dr = 41:59). Two diastereoisomers are hard to be separated by column chromatography on silica gel.  $^1\text{H}$  NMR (500 MHz,  $\text{CDCl}_3$ )  $\delta$  7.60-7.50 (m, 2H), 7.35-7.25 (m, 5H), 7.23-7.12 (m, 6H), 7.07-7.05 (m, 1H), [5.59 (d,  $J$  = 1.9 Hz, 0.40H), 5.48 (d,  $J$  = 1.8 Hz, 0.60H)], 4.51-4.42 (m, 1H), 3.24-3.01 (m, 2H), [0.95 (s, 3.6H), 0.83 (s, 5.4H)].  $^{13}\text{C}$  NMR (126 MHz,  $\text{CDCl}_3$ )  $\delta$  211.1, 210.6, 193.2, 193.0, 142.8, 142.4, 139.9, 139.7, 137.7, 137.6, 137.0, 136.8, 130.2, 130.1, 129.0(3), 128.9(9), 128.2, 128.1(2), 128.0(9), 128.0(6), 128.0, 127.8(3), 127.7(7), 126.4(4), 126.4(1), 126.0, 125.9, 114.0, 113.9, 109.3, 109.2, 44.4(5), 44.4(0), 41.5, 40.8, 33.3, 33.2, 29.7, 29.5. These data are consistent with the published literature.<sup>1</sup>

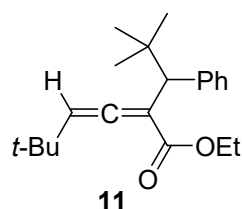

**Ethyl 2-(2,2-dimethyl-1-phenylpropyl)-5,5-dimethylhexa-2,3-dienoate (11).** Flash column chromatography to afford product **11** as a colorless oil (44.0 mg, 70% yield, dr = 51:49). Two diastereoisomers are hard to be separated by column

chromatography on silica gel.  $^1\text{H}$  NMR (500 MHz,  $\text{CDCl}_3$ )  $\delta$  7.38-7.31 (m, 2H), 7.26-7.22 (m, 2H), 7.21-7.17 (m, 1H), 5.63 (s, 1H), 4.20-3.98 (m, 2H), [3.80 (s, 0.52H), 3.78 (s, 0.48H)], 1.22 (s, 4.68H), 1.20 (m, 3H), 1.07 (s, 4.32H), [1.00 (s, 4.68H), 0.96 (s, 4.32H)].  $^{13}\text{C}$  NMR (126 MHz,  $\text{CDCl}_3$ )  $\delta$  209.2, 209.1, 168.4, 168.3, 142.1, 141.6, 130.3, 130.1, 127.3(1), 127.2(8), 126.2, 126.1, 107.5, 107.2, 103.9, 60.8, 53.5, 53.4, 35.6, 34.9, 33.7, 33.4, 29.9, 29.6, 28.2(2), 28.1(9), 14.1. HRMS (ESI)  $[\text{M}+\text{H}]^+$ : calculated for  $\text{C}_{21}\text{H}_{31}\text{O}_2$ : 315.2324, found 315.2323.

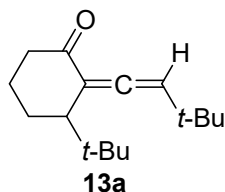

**3-(tert-Butyl)-2-(3,3-dimethylbut-1-en-1-ylidene)cyclohexan-1-one (13a).** Flash column chromatography to afford product **13a** as a pale yellow oil (29.0 mg, 62% yield, dr = 48:52). Two diastereoisomers are hard to be separated by column chromatography on silica gel.  $^1\text{H}$  NMR (500 MHz,  $\text{CDCl}_3$ )  $\delta$  [5.45 (d,  $J = 3.1$  Hz, 0.60H), 5.41 (d,  $J = 2.6$  Hz, 0.40H)], 2.51-2.37 (m, 2H), 2.29-2.17 (m, 1H), 2.01-1.94 (m, 1H), 1.93-1.87 (m, 1H), 1.73-1.61 (m, 1H), 1.54-1.41 (m, 1H), [1.11 (s, 5.4H), 1.05 (s, 3.6H), 0.95 (s, 5.4H), 0.88 (s, 3.6H)].  $^{13}\text{C}$  NMR (126 MHz,  $\text{CDCl}_3$ )  $\delta$  206.7, 205.1, 203.6, 203.4, 109.2, 108.9, 105.4, 105.0, 48.9, 48.5, 40.0, 35.8, 34.2, 33.0, 32.9, 30.1, 30.0, 27.7, 27.4, 25.6, 25.0, 21.4, 21.1. HRMS (ESI)  $[\text{M}+\text{H}]^+$ : calculated for  $\text{C}_{16}\text{H}_{27}\text{O}$ : 235.2062, found 235.2056.

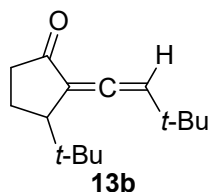

**3-(tert-Butyl)-2-(3,3-dimethylbut-1-en-1-ylidene)cyclopentan-1-one (13b).** Flash column chromatography to afford product **13b** as a pale yellow oil (23.8 mg, 54% yield, dr = 71:29). Two diastereoisomers are hard to be separated by column chromatography on silica gel.  $^1\text{H}$  NMR (500 MHz,  $\text{CDCl}_3$ )  $\delta$  [5.64 (d,  $J = 5.2$  Hz, 0.72H), 5.61 (d,  $J = 5.0$  Hz, 0.28H)], 2.80-2.75 (m, 1H), 2.42-2.23 (m, 2H), 2.04-1.97 (m, 1H), 1.78-1.68 (m, 1H), [1.13 (s, 6.48H), 1.09 (s, 2.52H)], [0.99 (s, 6.48H), 0.95 (s, 2.52H)].  $^{13}\text{C}$  NMR (126 MHz,  $\text{CDCl}_3$ )  $\delta$  207.6(5), 207.6(3), 204.2, 203.7, 107.9, 107.8, 107.7, 107.5, 51.5, 51.2, 38.2(3), 38.2(0), 34.2, 33.6(0), 33.5(7), 33.3, 30.2, 30.1(5), 27.5, 27.3, 23.0, 22.7. HRMS (ESI)  $[\text{M}+\text{H}]^+$ : calculated for  $\text{C}_{15}\text{H}_{24}\text{O}$ : 221.1905, found 221.1906.

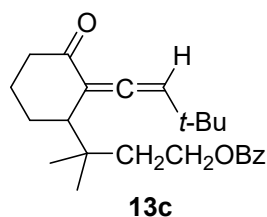

**3-(2-(3,3-Dimethylbut-1-en-1-ylidene)-3-oxocyclohexyl)-3-methylbutyl benzoate**

**(13c).** Flash column chromatography to afford product **13c** as a pale yellow oil (35.4 mg, 48% yield, dr = 48:52). Two diastereoisomers are hard to be separated by column chromatography on silica gel.  $^1\text{H}$  NMR (500 MHz,  $\text{CDCl}_3$ )  $\delta$  8.01 (m, 2H), 7.57-7.51 (m, 1H), 7.45-7.43 (m, 2H), [5.49 (d,  $J = 3.1$  Hz, 0.55H), 5.46 (d,  $J = 2.7$  Hz, 0.45H)], 4.45-4.31 (m, 2H), 2.71-2.54 (m, 1H), 2.55-2.45 (m, 1H), 2.31-2.17 (m, 1H), 2.07-1.82 (m, 4H), 1.76-1.65 (m, 1H), 1.58-1.45 (m, 1H), [1.12 (s, 4.95H), 1.05 (s, 4.05H)], 1.05-0.96 (m, 6H).  $^{13}\text{C}$  NMR (126 MHz,  $\text{CDCl}_3$ )  $\delta$  206.6, 205.2, 203.2, 203.0, 166.6, 132.8, 130.3, 129.5, 128.3(2), 128.3(0), 108.6, 108.3, 105.8, 105.4, 62.1(2), 62.0(7), 47.4, 46.6, 39.9, 38.0, 37.9, 37.6, 36.2, 33.1, 33.0, 30.1, 30.0, 25.1, 24.9, 24.8, 24.7, 24.6, 21.3, 21.0. HRMS (ESI)  $[\text{M}+\text{Na}]^+$ : calculated for  $\text{C}_{24}\text{H}_{32}\text{O}_3\text{Na}$ : 391.2252, found 391.2249.

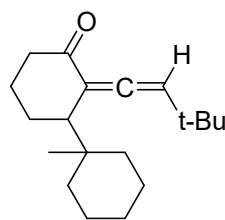

**13d**

**2-(3,3-Dimethylbut-1-en-1-ylidene)-1'-methyl-[1,1'-bi(cyclohexan)]-3-one (13d).** Flash column chromatography to afford product **13d** as a pale yellow oil (33.5 mg, 61% yield, dr = 52:48).

The first fraction: pale yellow oil.  $^1\text{H}$  NMR (500 MHz,  $\text{CDCl}_3$ )  $\delta$  5.43 (d,  $J = 2.8$  Hz, 1H), 2.65-2.61 (m, 1H), 2.50-2.44 (m, 1H), 2.26-2.20 (m, 1H), 1.97-1.86 (m, 2H), 1.71-1.65 (m, 1H), 1.52-1.24 (m, 11H), 1.11 (s, 9H), 0.85 (s, 3H).  $^{13}\text{C}$  NMR (126 MHz,  $\text{CDCl}_3$ )  $\delta$  205.5, 203.7, 108.6, 104.9, 46.2, 40.0, 36.7, 35.8, 32.9, 30.1, 26.2, 24.3, 21.9, 21.6, 21.3, 21.0. HRMS (ESI)  $[\text{M}+\text{H}]^+$ : calculated for  $\text{C}_{19}\text{H}_{31}\text{O}$ : 275.2375, found 275.2377.

The second fraction: pale yellow oil.  $^1\text{H}$  NMR (500 MHz,  $\text{CDCl}_3$ )  $\delta$  5.40 (d,  $J = 2.6$  Hz, 1H), 2.76-2.72 (m, 1H), 2.50-2.45 (m, 1H), 2.23-2.16 (m, 1H), 1.96-1.87 (m, 2H), 1.67-1.62 (m, 1H), 1.48-1.17 (m, 11H), 1.05 (s, 9H), 0.76 (s, 3H).  $^{13}\text{C}$  NMR (126 MHz,  $\text{CDCl}_3$ )  $\delta$  206.5, 203.9, 108.4, 104.8, 45.3, 40.0, 38.0, 35.9, 35.6, 33.0, 30.2, 26.2, 23.8, 21.8, 21.6, 21.1, 20.9. HRMS (ESI)  $[\text{M}+\text{H}]^+$ : calculated for  $\text{C}_{19}\text{H}_{31}\text{O}$ : 274.2375, found 274.2375.

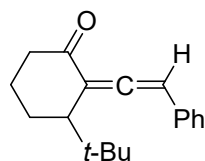

**13e**

**3-(tert-Butyl)-2-(2-phenylvinylidene)cyclohexan-1-one (13e).** Flash column chromatography to afford product **13e** as a pale yellow oil (23.4 mg, 46% yield, dr = 50:50). Two diastereoisomers are hard to be separated by column chromatography on silica gel.  $^1\text{H}$  NMR (500 MHz,  $\text{CDCl}_3$ )  $\delta$  7.32-7.29 (m, 3H), 7.23-7.21 (m, 2H), [6.53 (d,  $J = 3.0$  Hz, 0.47H), 6.45 (d,  $J = 3.0$  Hz, 0.53H)], 2.67-2.53 (m, 2H), 2.37-2.29 (m,

1H), 2.11-1.97 (m, 2H), 1.87-1.73 (m, 1H), 1.58-1.52 (m, 1H), [0.95 (s, 4.77H), 0.94 (s, 4.23H)]. <sup>13</sup>C NMR (126 MHz, CDCl<sub>3</sub>) δ 210.2, 209.4, 202.6, 202.3, 132.8, 132.6, 128.7(3), 128.6(7), 127.5, 127.4, 127.3, 127.0, 110.9, 110.8, 97.6, 97.2, 49.7, 48.5, 40.3, 40.3, 35.5, 34.4, 27.5, 27.4, 25.5, 25.1, 21.5, 21.4. HRMS (ESI) [M+H]<sup>+</sup>: calculated for C<sub>18</sub>H<sub>22</sub>O: 255.1749, found 255.1751.

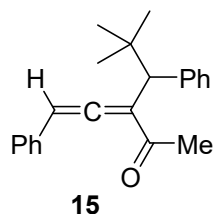

**5,5-Dimethyl-4-phenyl-3-(2-phenylvinylidene)hexan-2-one (15).** Flash column chromatography to afford product **15** as a white solid (44.9 mg, 74% yield, dr = 49:51). Two diastereoisomers are hard to be separated by column chromatography on silica gel. <sup>1</sup>H NMR (500 MHz, CDCl<sub>3</sub>) δ 7.40-7.28 (m, 3H), 7.29-7.18 (m, 4H), 7.20-7.08 (m, 3H), 6.73 (s, 1H), [3.98 (s, 0.49H), 3.97 (s, 0.51H)], [2.22 (s, 1.47H), 2.20 (s, 1.53H)], [0.90 (s, 4.59H), 0.87 (s, 4.41H)]. <sup>13</sup>C NMR (126 MHz, CDCl<sub>3</sub>) δ 217.0, 216.5, 197.4, 197.3, 141.6, 141.3, 132.1, 131.9, 130.1, 130.0, 129.1, 128.9, 127.9(8), 127.9(7), 127.6, 127.5, 127.4, 127.2, 126.3(4), 126.2(8), 114.8, 114.3, 100.3, 99.9, 51.7, 35.5, 35.0, 28.2(0), 28.1(6), 26.8, 26.7. These data are consistent with the published literature.<sup>7</sup>

## 4 Deuteration study

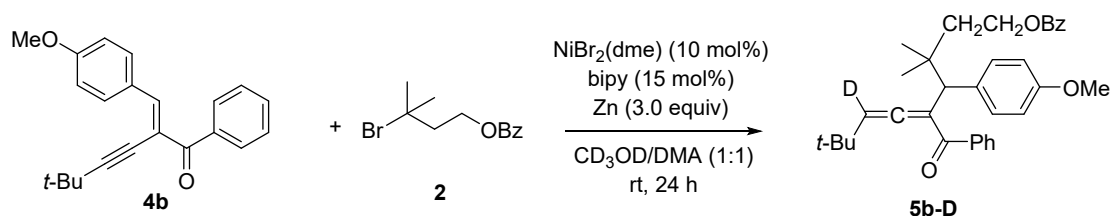

To an oven-dried Schlenk tube was charged with **4b** (63.8 mg, 0.2 mmol, 1.0 equiv), NiBr<sub>2</sub>(dme) (6.2 mg, 10 mol%), 2,2'-bipyridine (4.7 mg, 15 mol%), Zn (39 mg, 0.6 mmol, 3.0 equiv). The tube was capped with a rubber septum, evacuated and back-filled with nitrogen three times, at which point DMA (1 mL) and CD<sub>3</sub>OD (1 mL) was added via a syringe prior to the addition of tertiary alkyl bromide **2** (108.2 mg, 0.4 mmol, 2.0 equiv). The reaction mixture was allowed to stir at room temperature for 24 h, 3 mL of H<sub>2</sub>O was added to quench the reaction and the mixture was extracted by ethyl acetate. The combined organic layer was dried over MgSO<sub>4</sub>. After filtration and concentration, the residue was purified by column chromatography on silica gel. The product **5b-D** with 95% D-incorporation was determined by <sup>1</sup>H NMR.

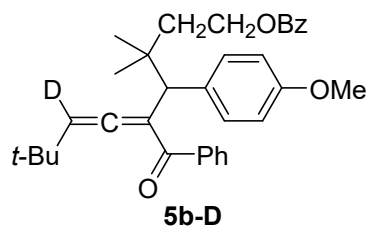

**5-Benzoyl-4-(4-methoxyphenyl)-3,3,8,8-tetramethylnona-5,6-dien-1-yl-7-*d***

**benzoate (5b-D).** The product 5b-D was obtained in 74% yield (75.7 mg, D-incorporation > 95 %, dr = 36:64) as a white solid after column chromatography. The mixtures are hard to be separated by column chromatography on silica gel. <sup>1</sup>H NMR (500 MHz, CDCl<sub>3</sub>) δ 8.03-8.00 (m, 2H), 7.64-7.51 (m, 3H), 7.45-7.29 (m, 7H), 6.85-6.81 (m, 2H), 4.49-4.39 (m, 2H), [4.21 (s, 0.37H), 4.15 (s, 0.63H)], 3.78 (s, 3H), 2.04-1.80 (m, 2H), 1.15-1.12 (m, 6H), [0.94 (s, 5.67H), 0.71 (s, 3.33H)]. <sup>13</sup>C NMR (126 MHz, CDCl<sub>3</sub>) δ 213.3, 212.4, 196.2, 195.6, 166.5(7), 166.5(6), 158.2, 158.1, 138.5(2), 138.4(9), 133.0, 132.9, 132.7, 131.4, 131.3, 131.2, 131.0, 130.4(1), 130.3(9), 129.5, 128.7, 128.5, 128.2, 127.5, 127.4, 113.0, 112.9, 111.8, 111.6, 108.6, 108.4, 108.1(t, *J* = 23.9 Hz), 62.3, 55.1(2), 55.1(1), 51.5, 50.8, 38.6, 38.3, 38.0, 36.8, 33.5, 33.1, 29.4, 29.0, 25.7, 25.3, 25.0, 24.9. HRMS (ESI) [M+Na]<sup>+</sup>: calculated for C<sub>34</sub>H<sub>37</sub>DO<sub>4</sub>Na: 534.2731, found 534.2731.

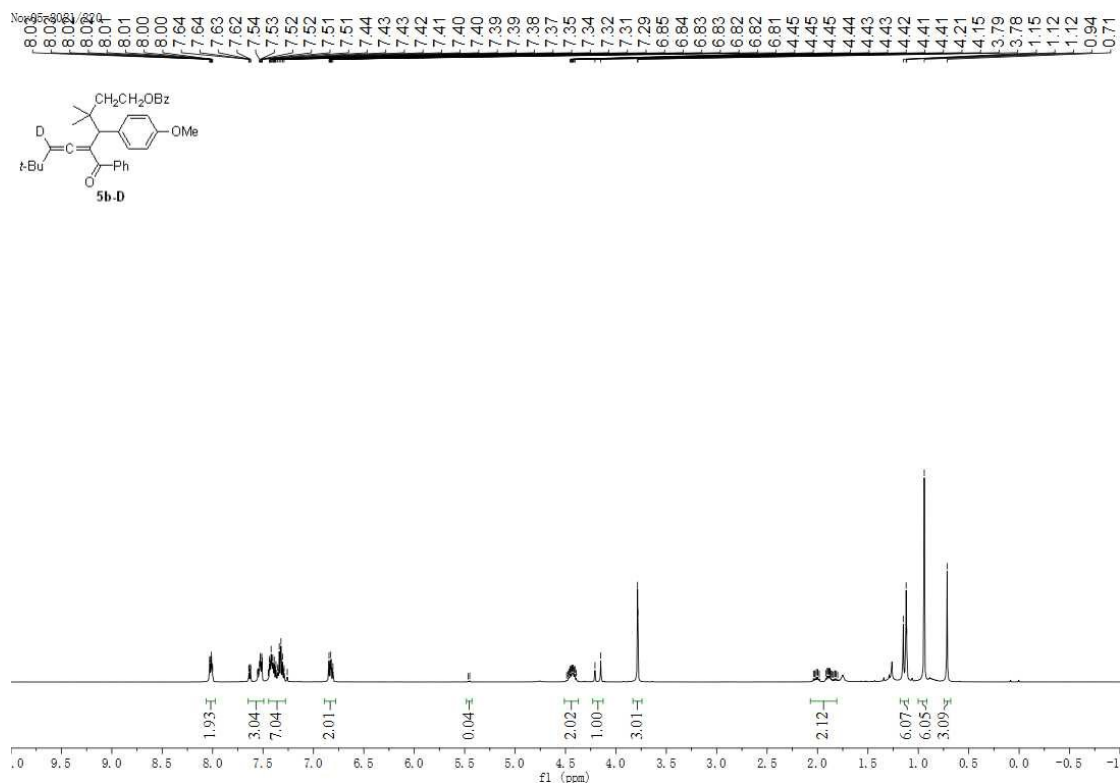

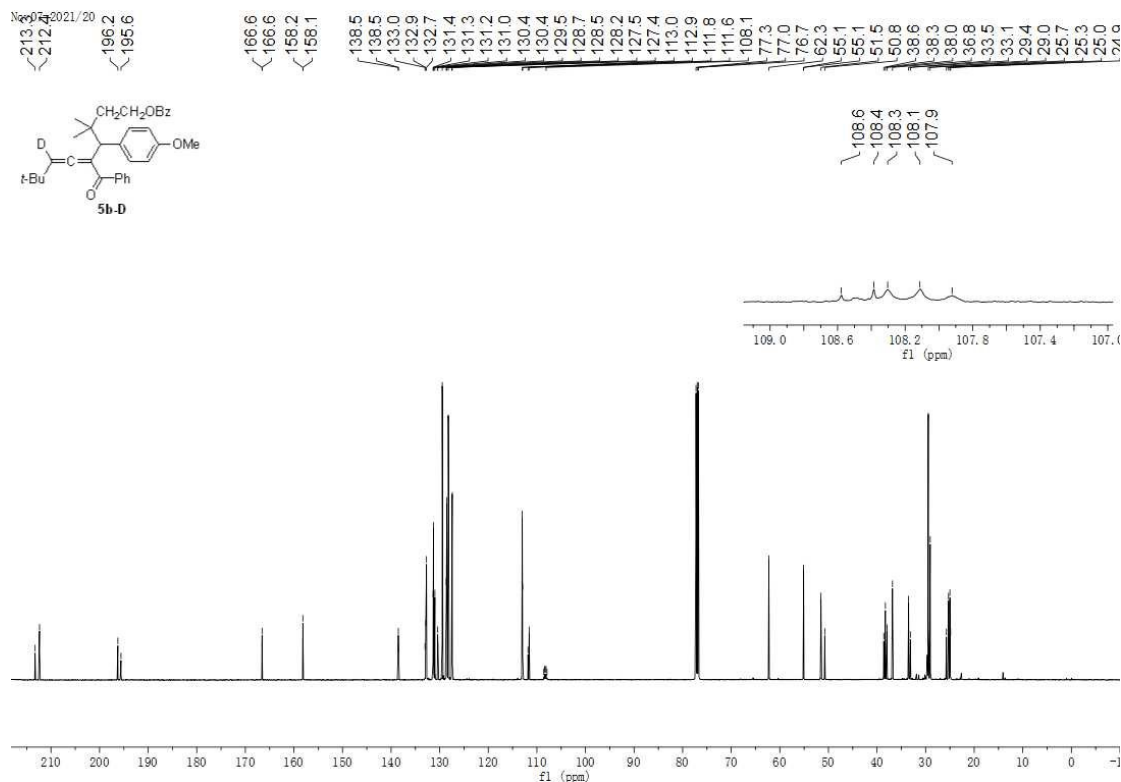

## 5 Transformation of 1,2-allenyl ketones

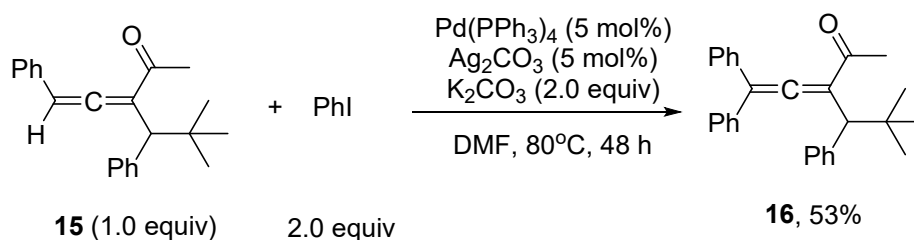

The reaction of **15** (55.2 mg, 0.2 mmol), iodobenzene (81.3 mg, 0.4 mmol), Pd(PPh<sub>3</sub>)<sub>4</sub> (11.3 mg, 0.01 mmol), Ag<sub>2</sub>CO<sub>3</sub> (2.8 mg, 0.01 mmol), and K<sub>2</sub>CO<sub>3</sub> (55.3 mg, 0.4 mmol) in 2 mL dried DMF at 80 °C under N<sub>2</sub> for 48 h. Then, 3 mL of H<sub>2</sub>O was added to quench the reaction and the mixture was extracted by ethyl ester (3x10 mL). The combined organic layer was dried over MgSO<sub>4</sub>. After filtration and concentration, the residue was purified by column chromatography on silica gel to give **16** (40.3 mg) in 53% yield.

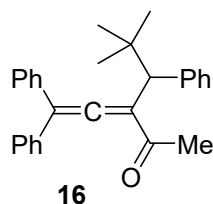

**3-(2,2-Diphenylvinylidene)-5,5-dimethyl-4-phenylhexan-2-one (16)**. White solid.  
<sup>1</sup>H NMR (500 MHz, CDCl<sub>3</sub>) δ 7.47-7.45 (m, 4H), 7.41-7.38 (m, 1H), 7.34-7.30 (m,



5H), 7.24-7.22 (m, 2H), 7.20-7.18 (m, 3H), 4.07 (s, 1H), 2.36 (s, 3H), 0.89 (s, 9H). <sup>13</sup>C NMR (126 MHz, CDCl<sub>3</sub>) δ 215.4, 197.6, 141.3, 134.9, 134.7, 130.3, 128.9, 128.7(2), 128.6(8), 128.4, 128.1, 128.0(1), 127.9(6), 127.5, 126.3, 113.7, 52.5, 35.1, 28.3, 27.1. HRMS (ESI) [M+ Na]<sup>+</sup>: calculated for C<sub>28</sub>H<sub>28</sub>ONa: 403.2038, found 403.2039.

## 6 Reference

- [1] W. Lei, Y. Liu, Y. Fang, Y. Li, C. Du and J. Fang, Modular access to 1,2-allenyl ketones based on a photoredox-catalysed radical-polar crossover process, *Org. Biomol. Chem.*, 2021, **19**, 8502-8506.
- [2] Y. Liu, W. Luo, T. Xia, Y. Fang, C. Du, X. Jin, Y. Li, L. Zhang, W. Lei and H. Wu. Merging radical-polar crossover/cycloisomerization processes: access to polyfunctional furans enabled by metallaphotoredox catalysis, *Org. Chem. Front.*, 2021, **8**, 1732-1738.
- [3] H. Huang, P. Bellotti, P. Pflueger, J. Schwarz, B. Heidrich, F. Glorius, Three-Component, Interrupted Radical Heck/Allylic Substitution Cascade Involving Unactivated Alkyl Bromides, *J. Am. Chem. Soc.*, 2020, **142**, 10173-10183.
- [4] H. Y. Kim, J. Y. Li, K. Oh, A Soft Vinyl Enolization Approach to  $\alpha$ -Acylvinyl Anions: Direct Aldol/Aldol Condensation Reactions of (*E*)- $\beta$ -Chlorovinyl Ketones, *Angew. Chem. Int. Ed.* 2013, **52**, 3736-3740.
- [5] H. Zhang, Q. Yao, L. Lin, C. Xu, X. Liu, X. Feng, Catalytic Asymmetric Epoxidation of Electron-Deficient Enynes Promoted by Chiral N, N'-Dioxide-Scandium(III) Complex, *Adv. Synth. Catal.*, 2017, **359**, 3454-3459.
- [6] X. Wang; J. Dong; X. Xu, B. Tang, Dinucleophilic Reactivity of Isocynoacetate: Base-Catalyzed One-Pot Access to 4-Azafluorenes and 4-Azafluorenones, *Org. Lett.*, 2021, **23**, 9063-9067.
- [7] X. Yu and J. Zhang, Regioselective Addition of Organometallic Reagents to 2-(1-Alkynyl)-2-alken-1-ones for an Efficient Synthesis of Substituted 1,2-Allenyl Ketones, *Adv. Synth. Catal.* 2011, **353**, 1265–1268.

## 7 NMR spectra of new compound

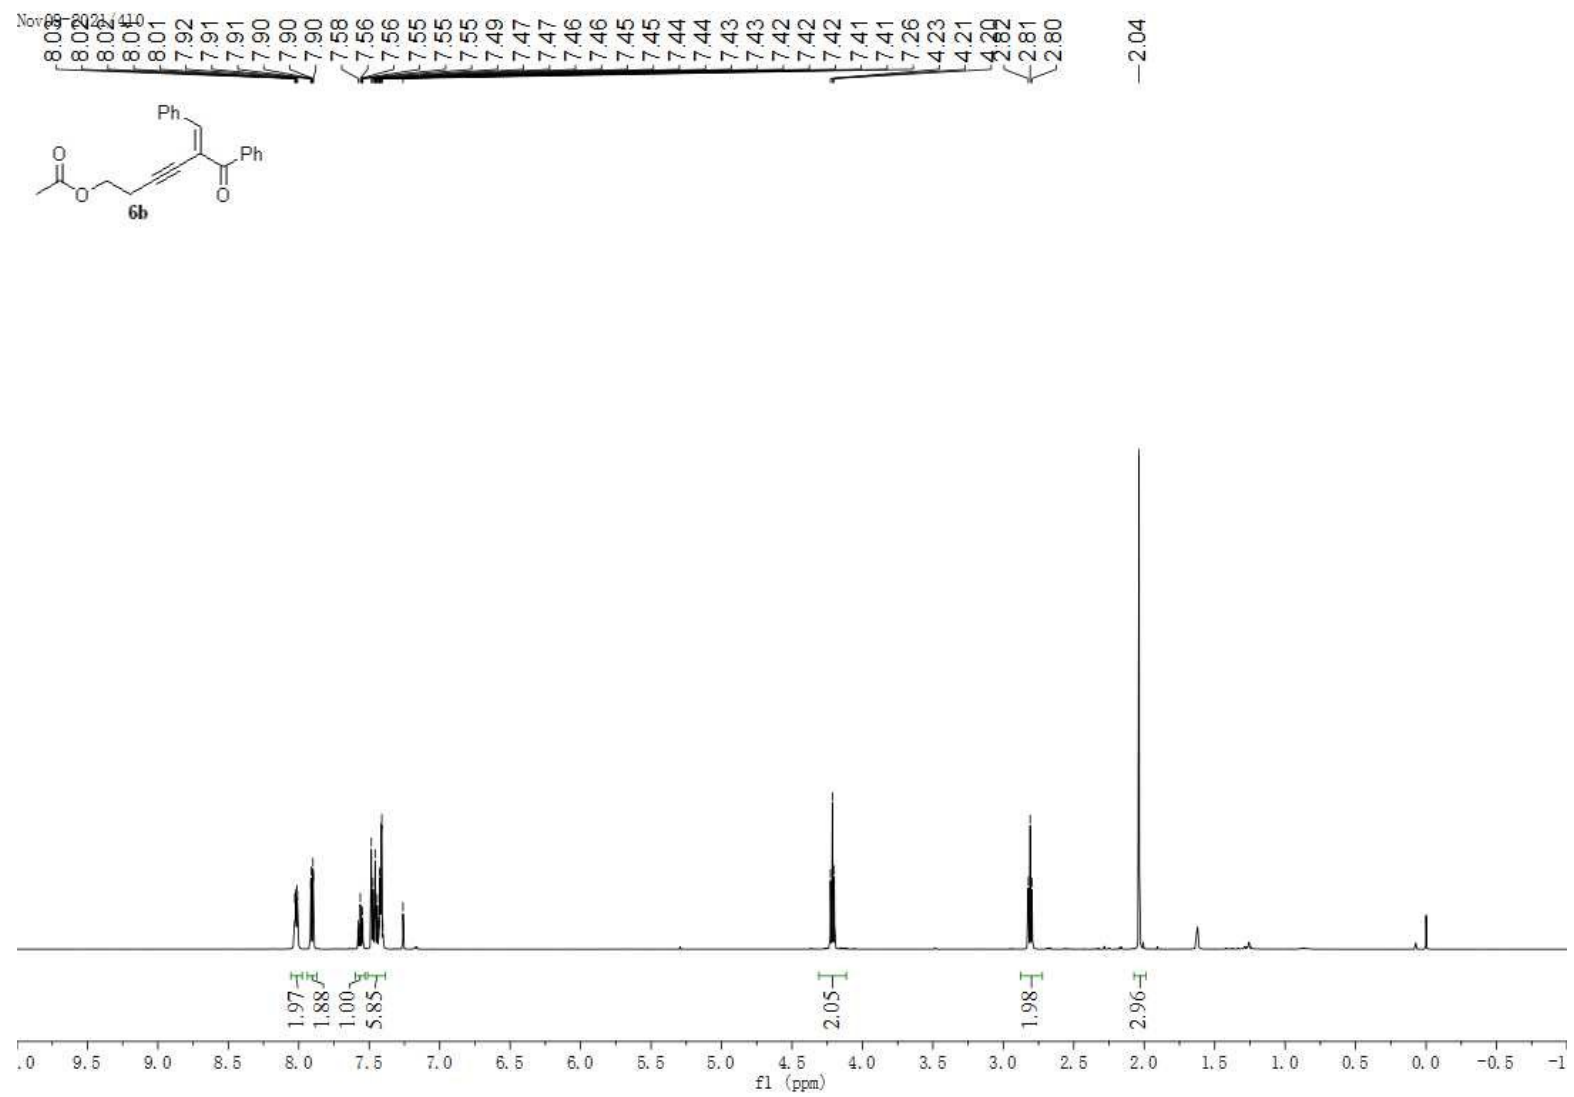

Nov-09-2021/411

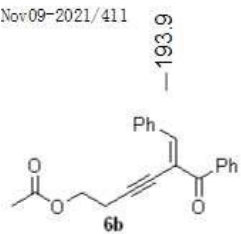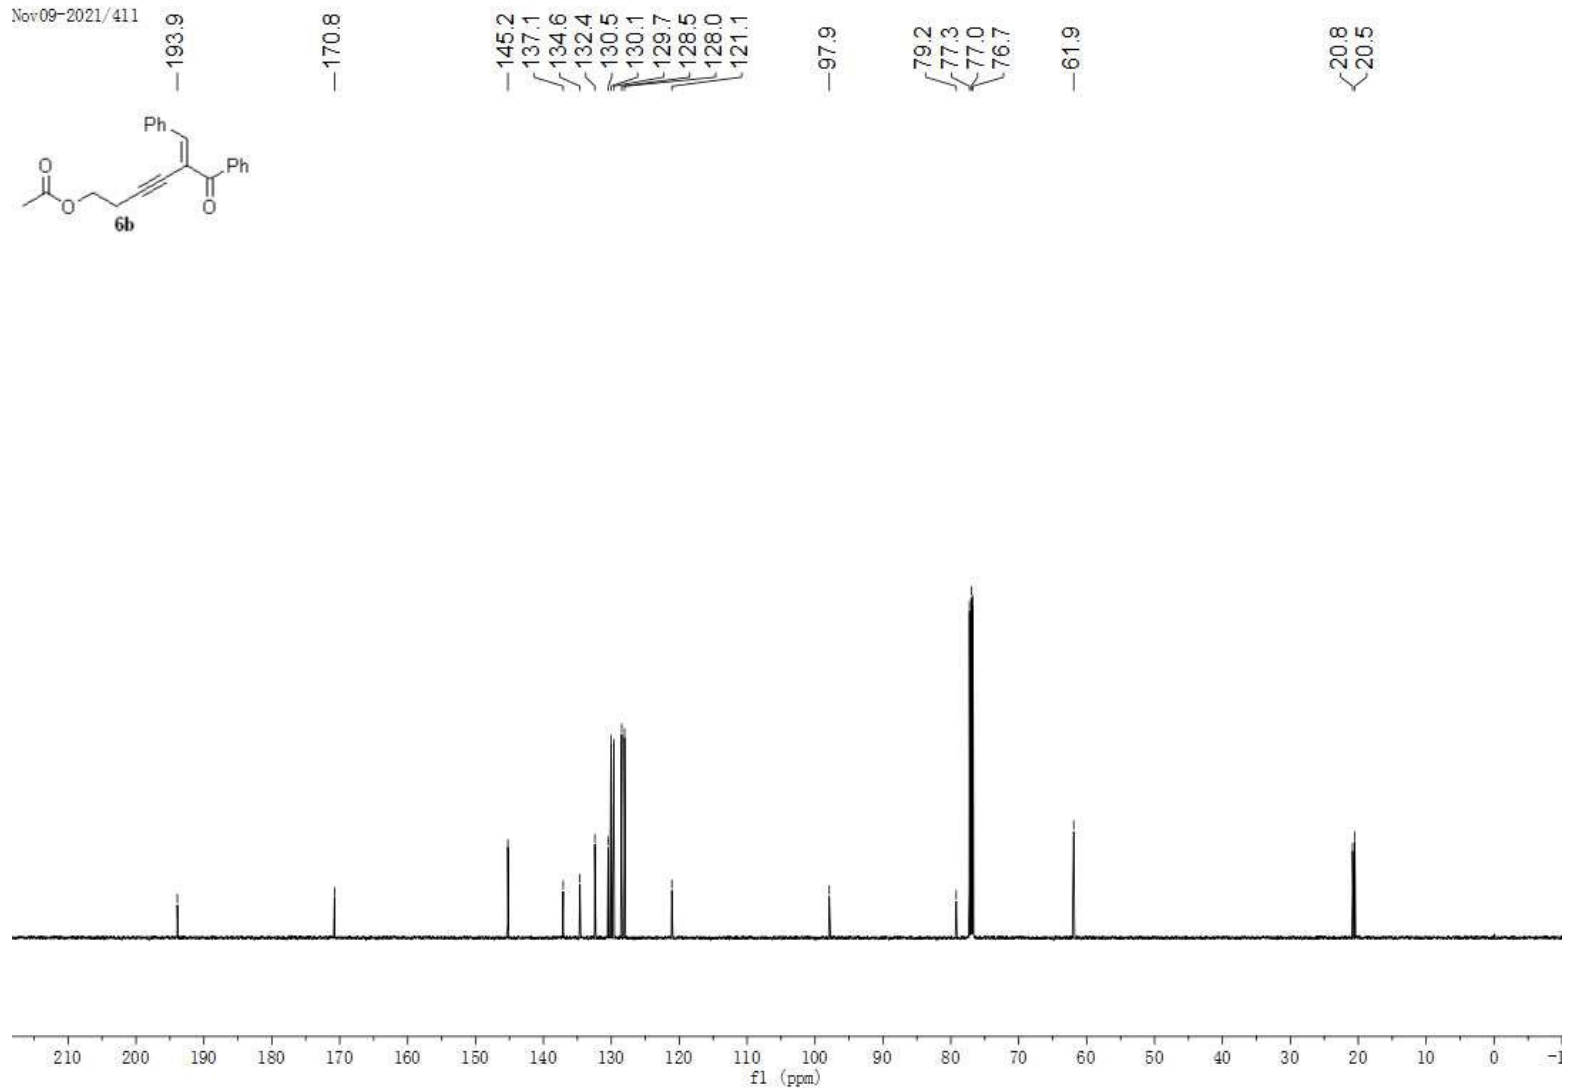

环戊烯酮核磁/290

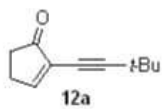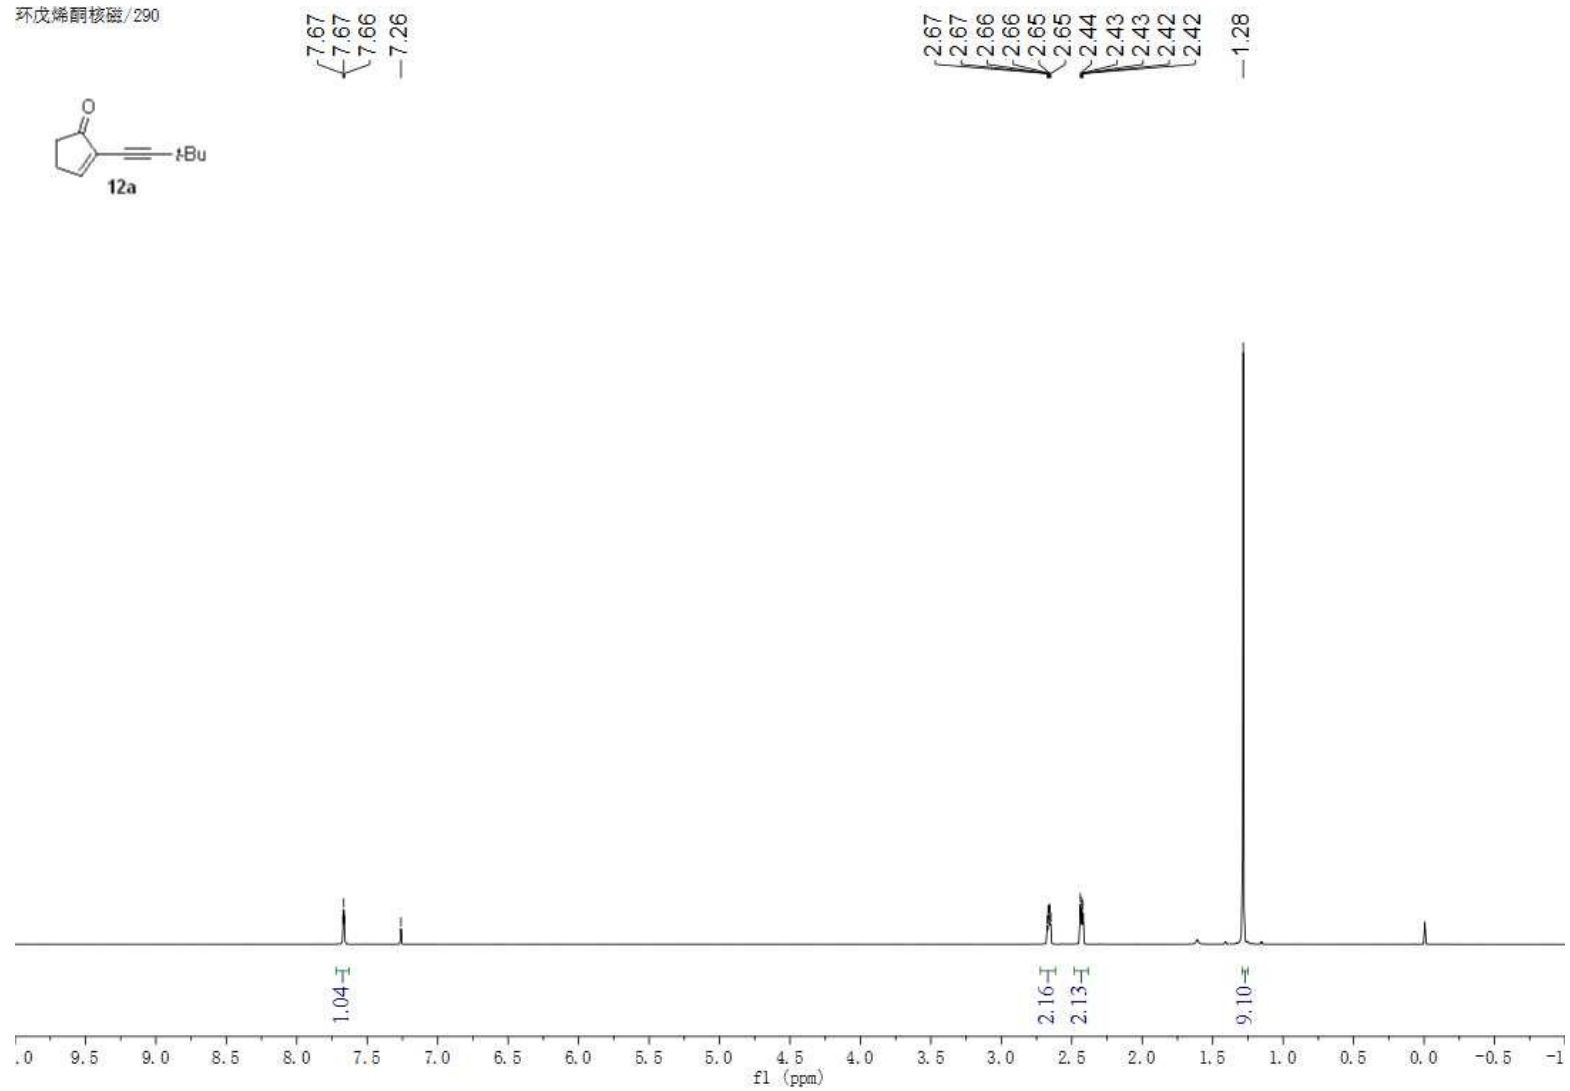

环戊烯酮核磁/291

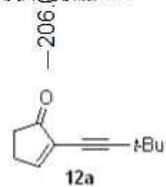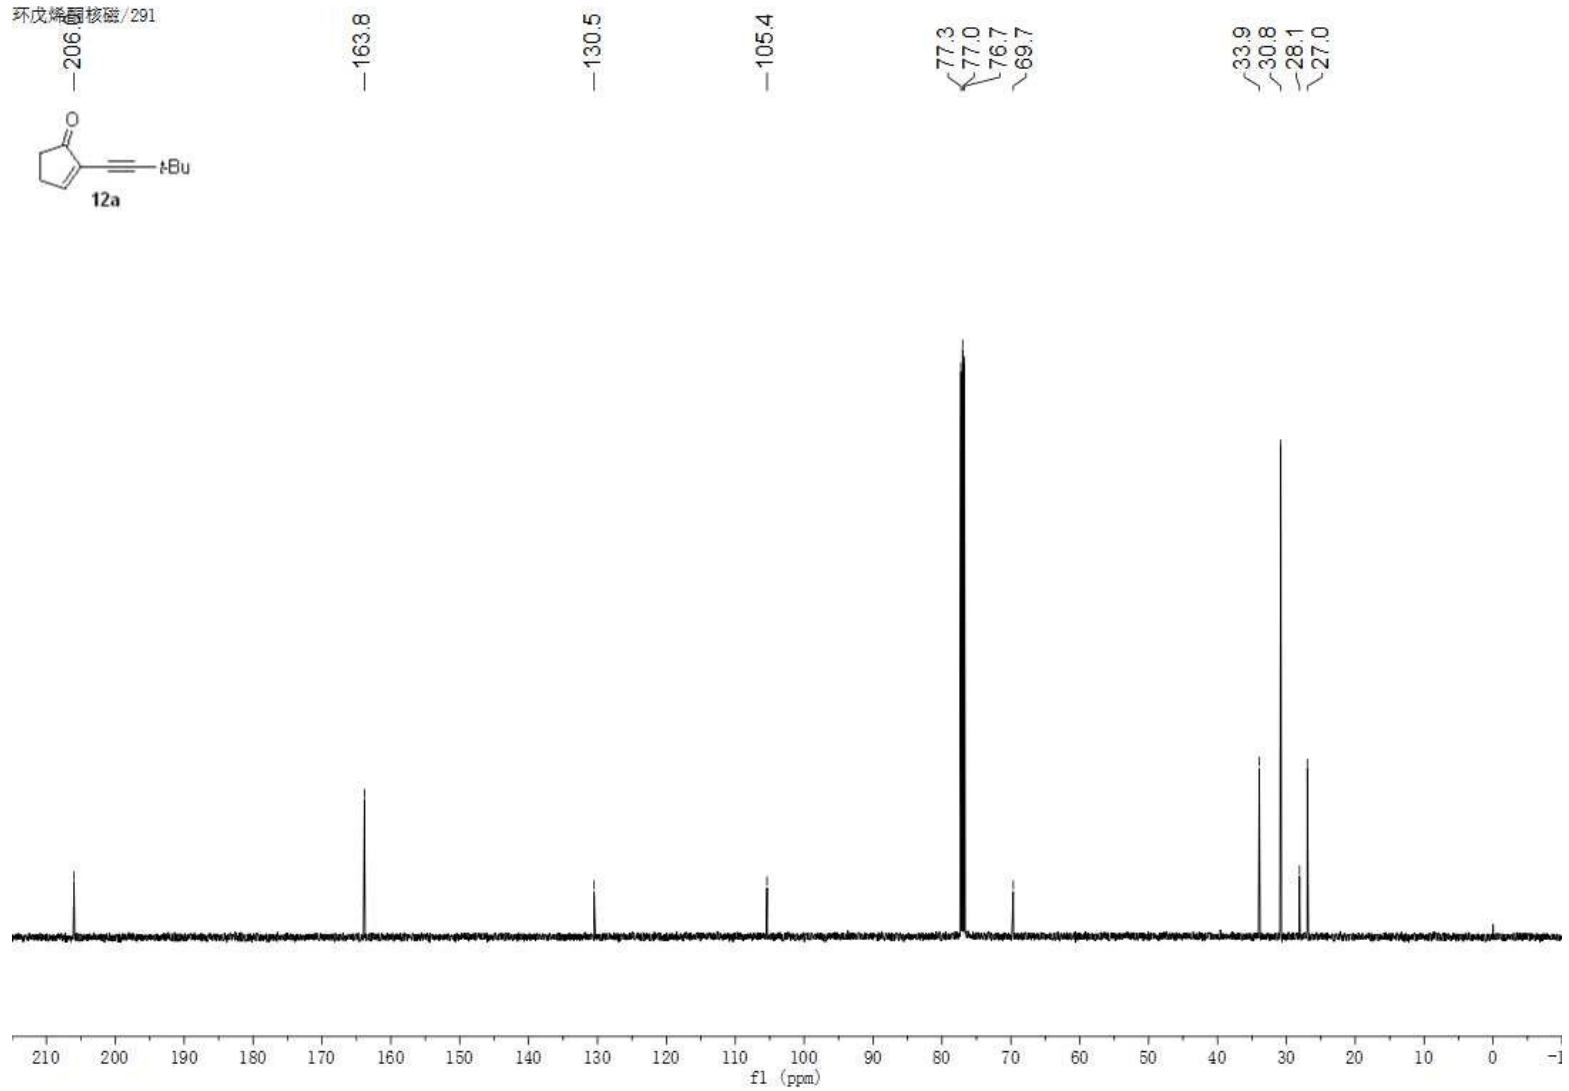

May21-2021/240

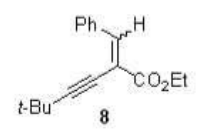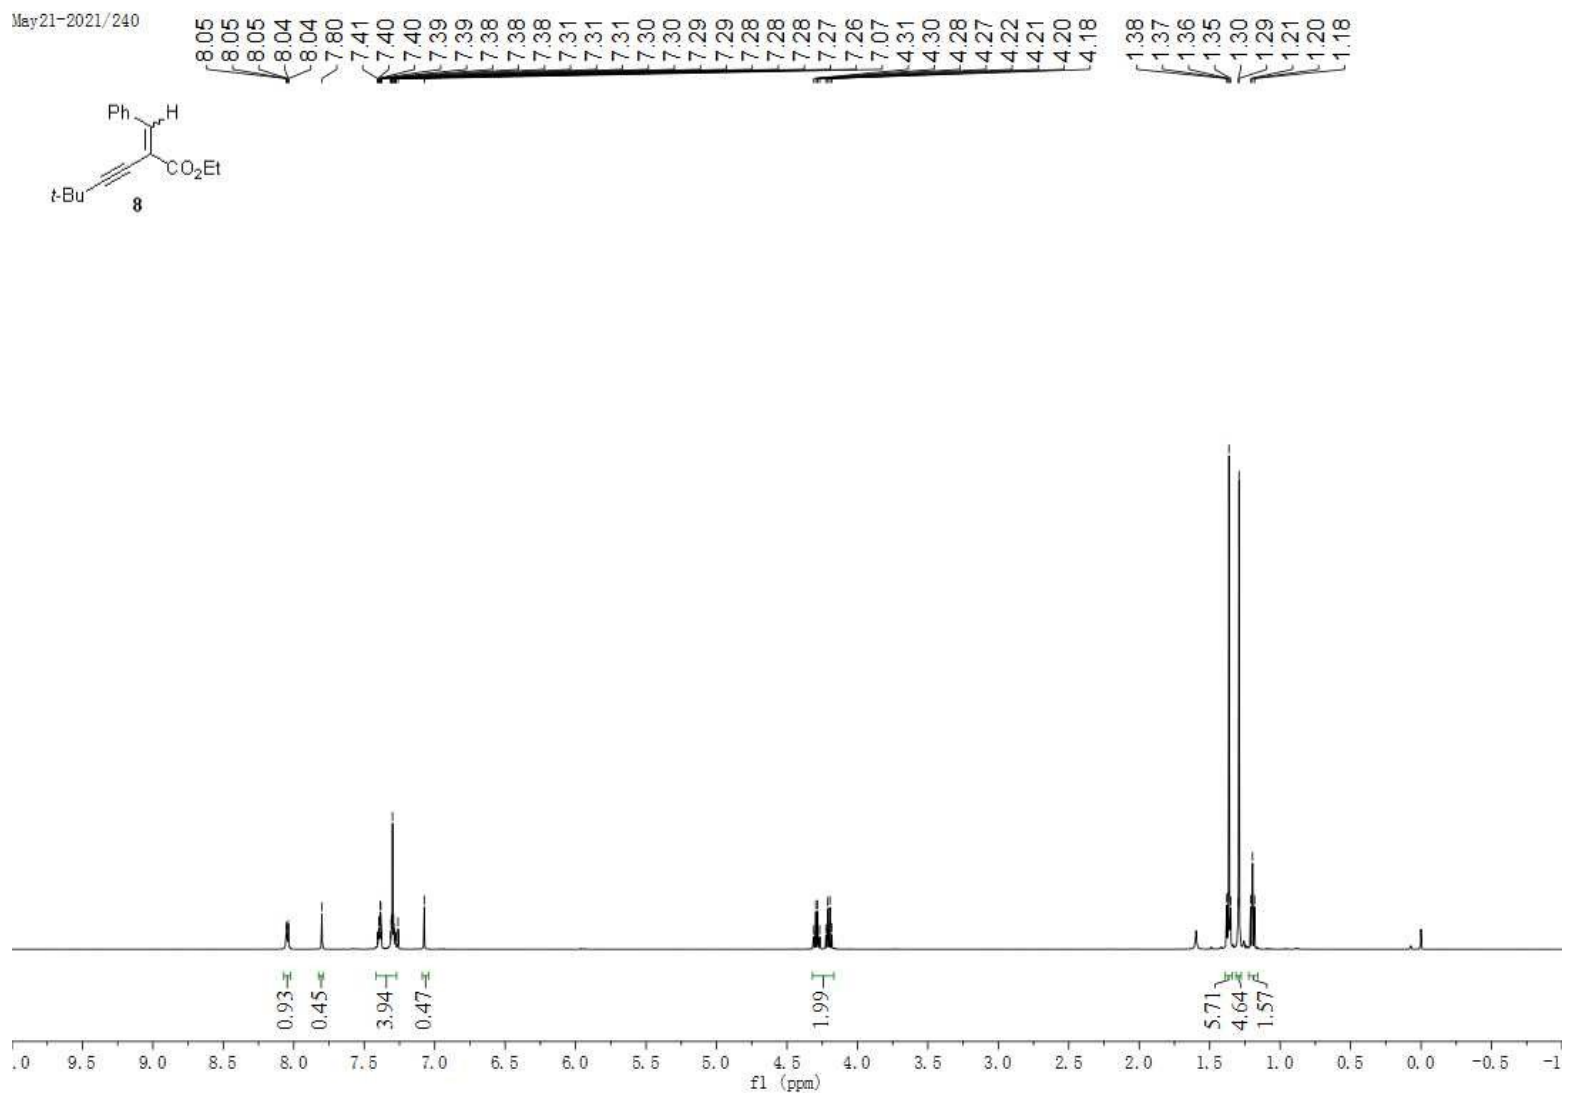

May21-2021/241

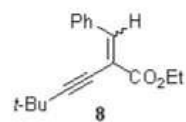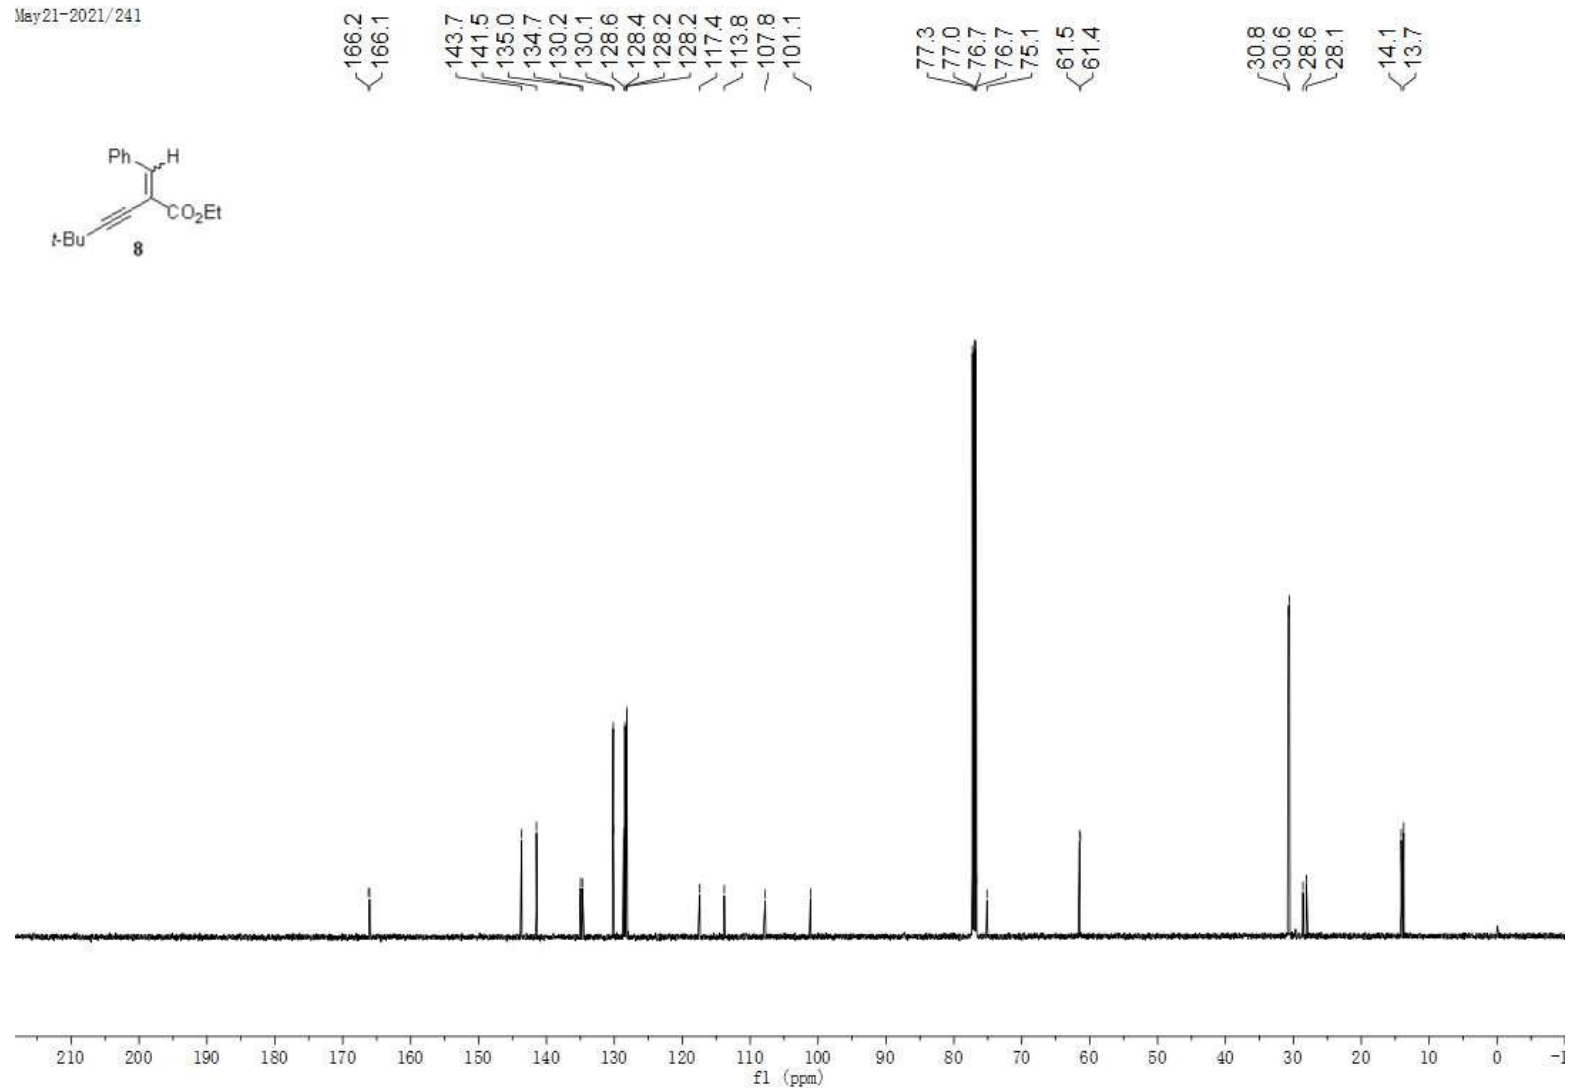

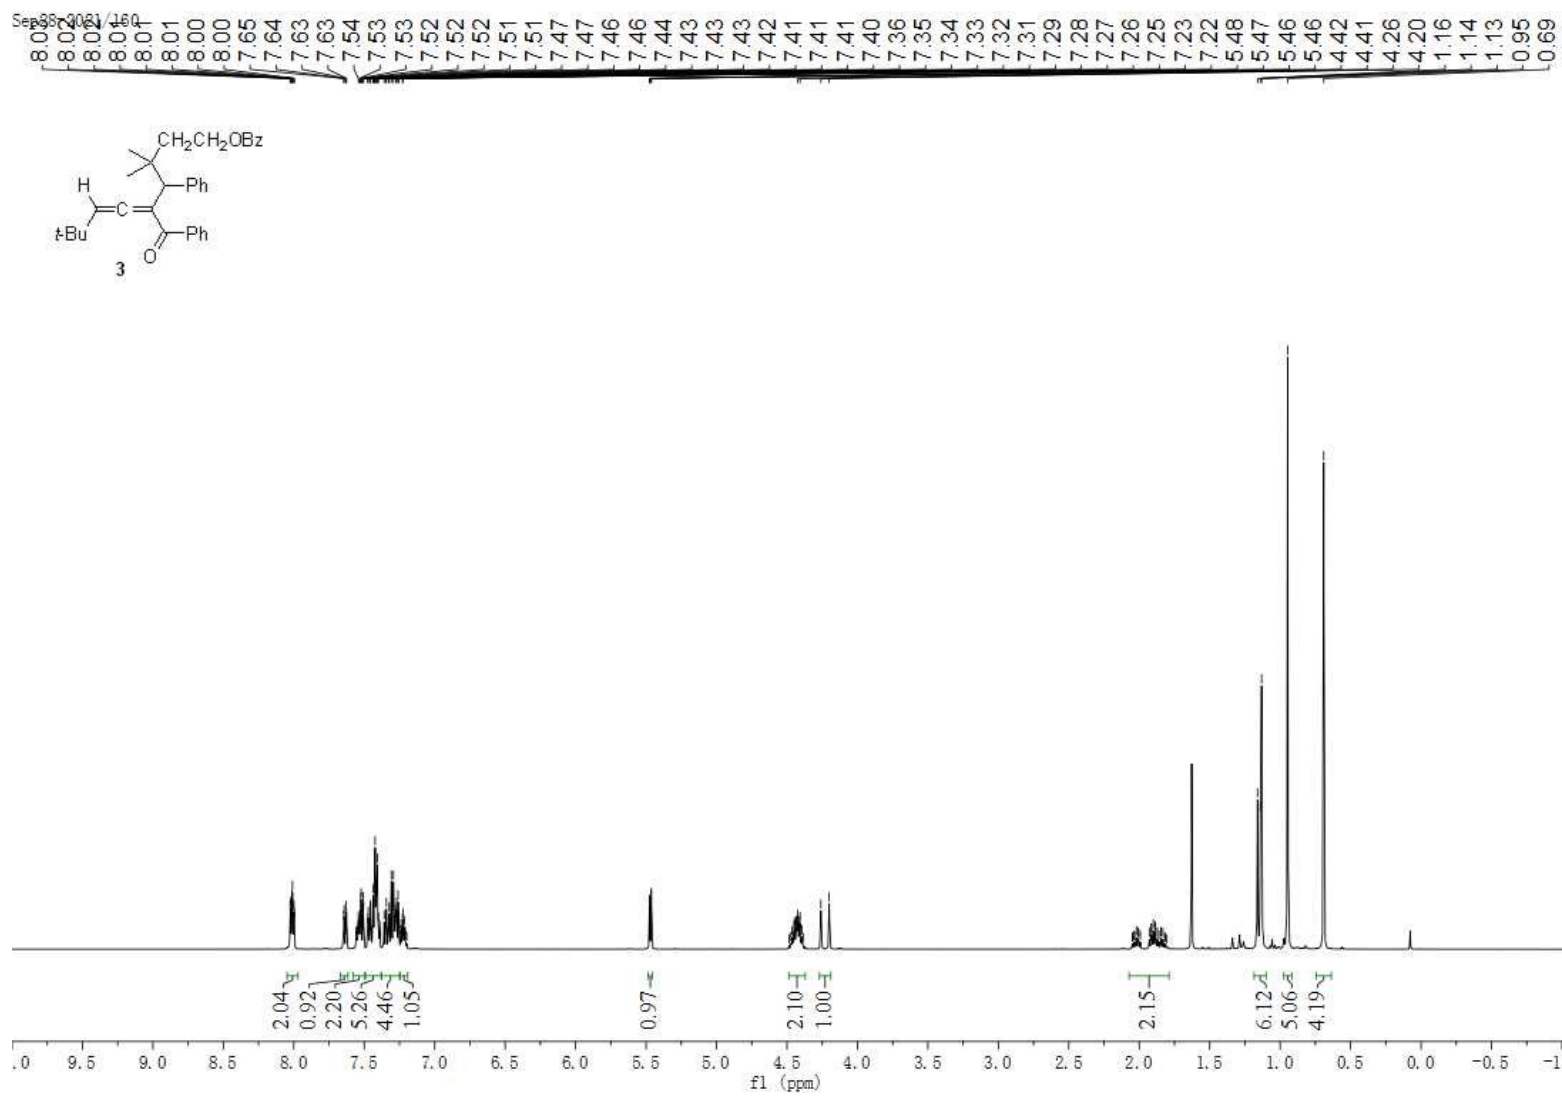



Seq: 2021/161

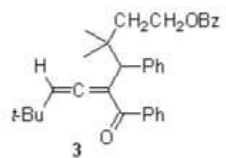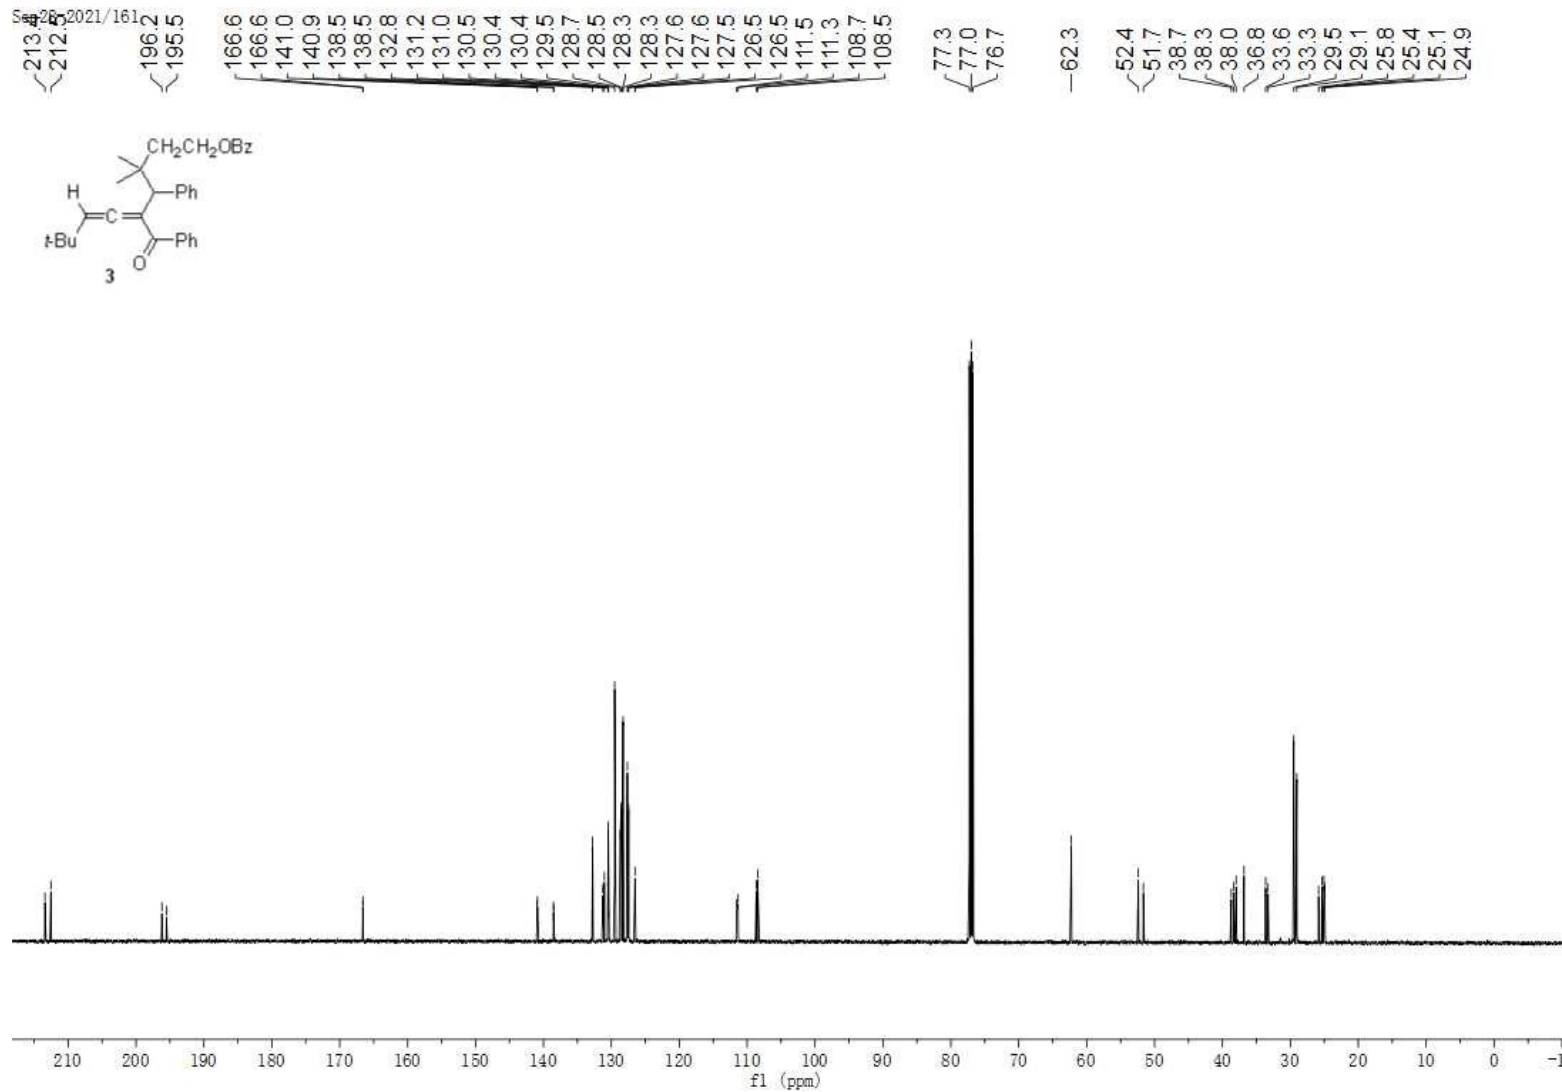

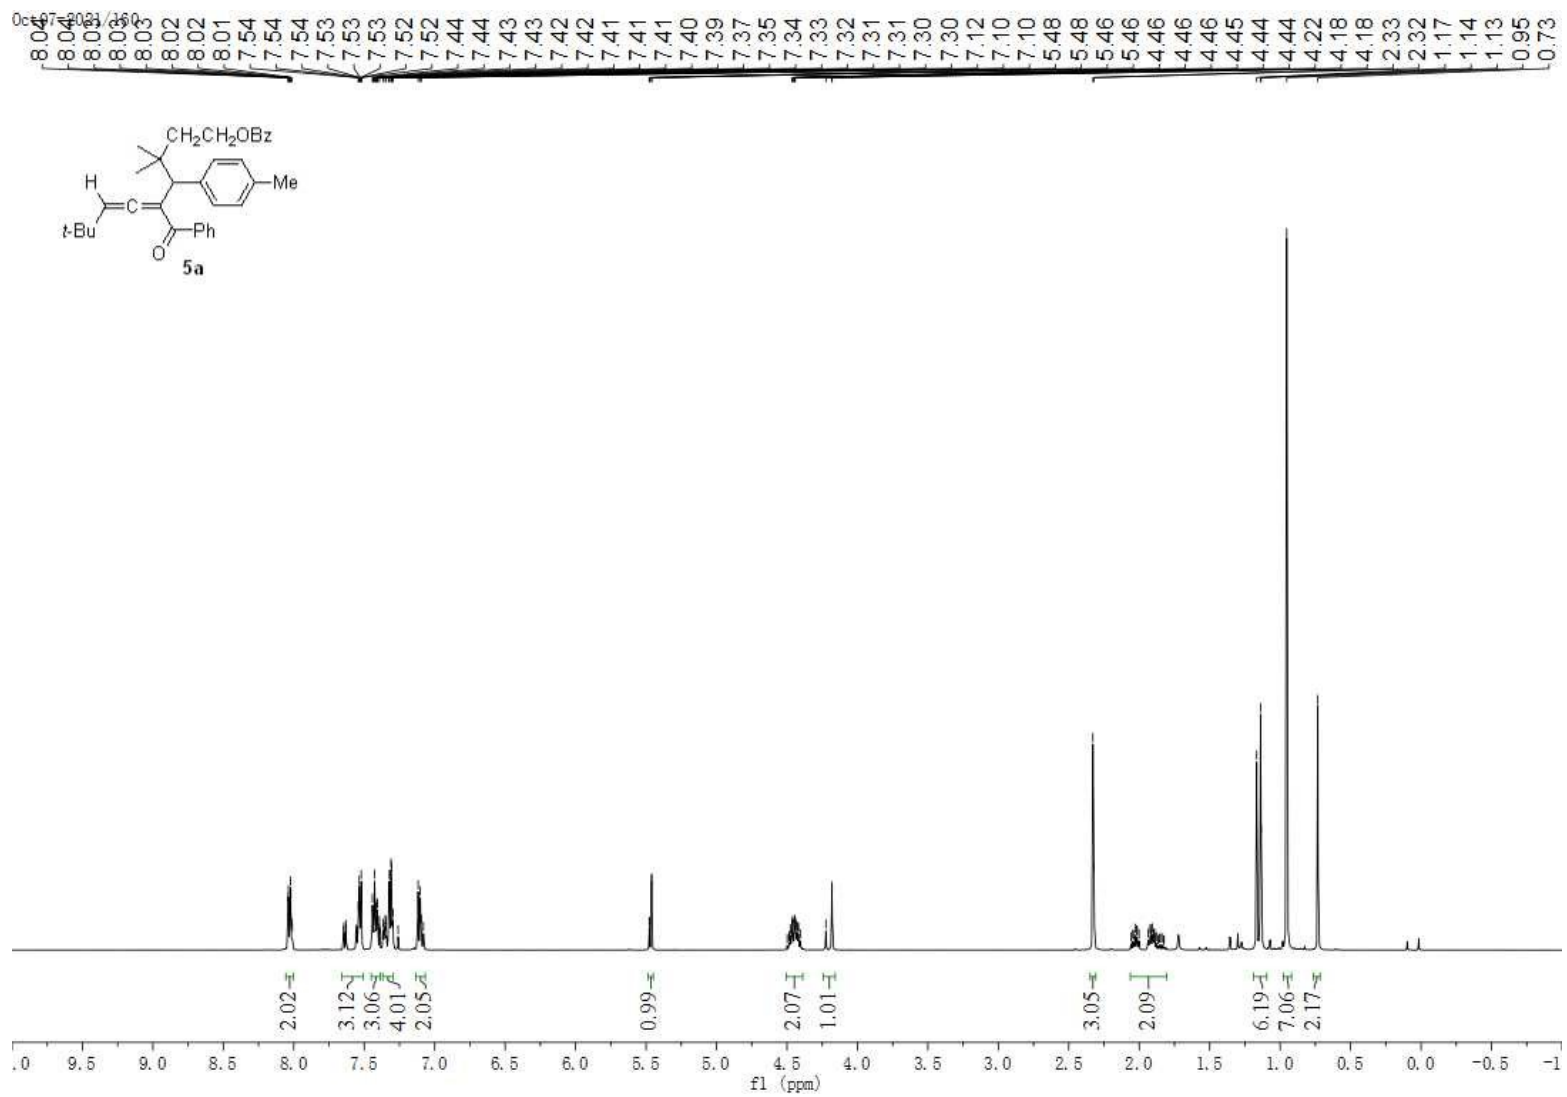

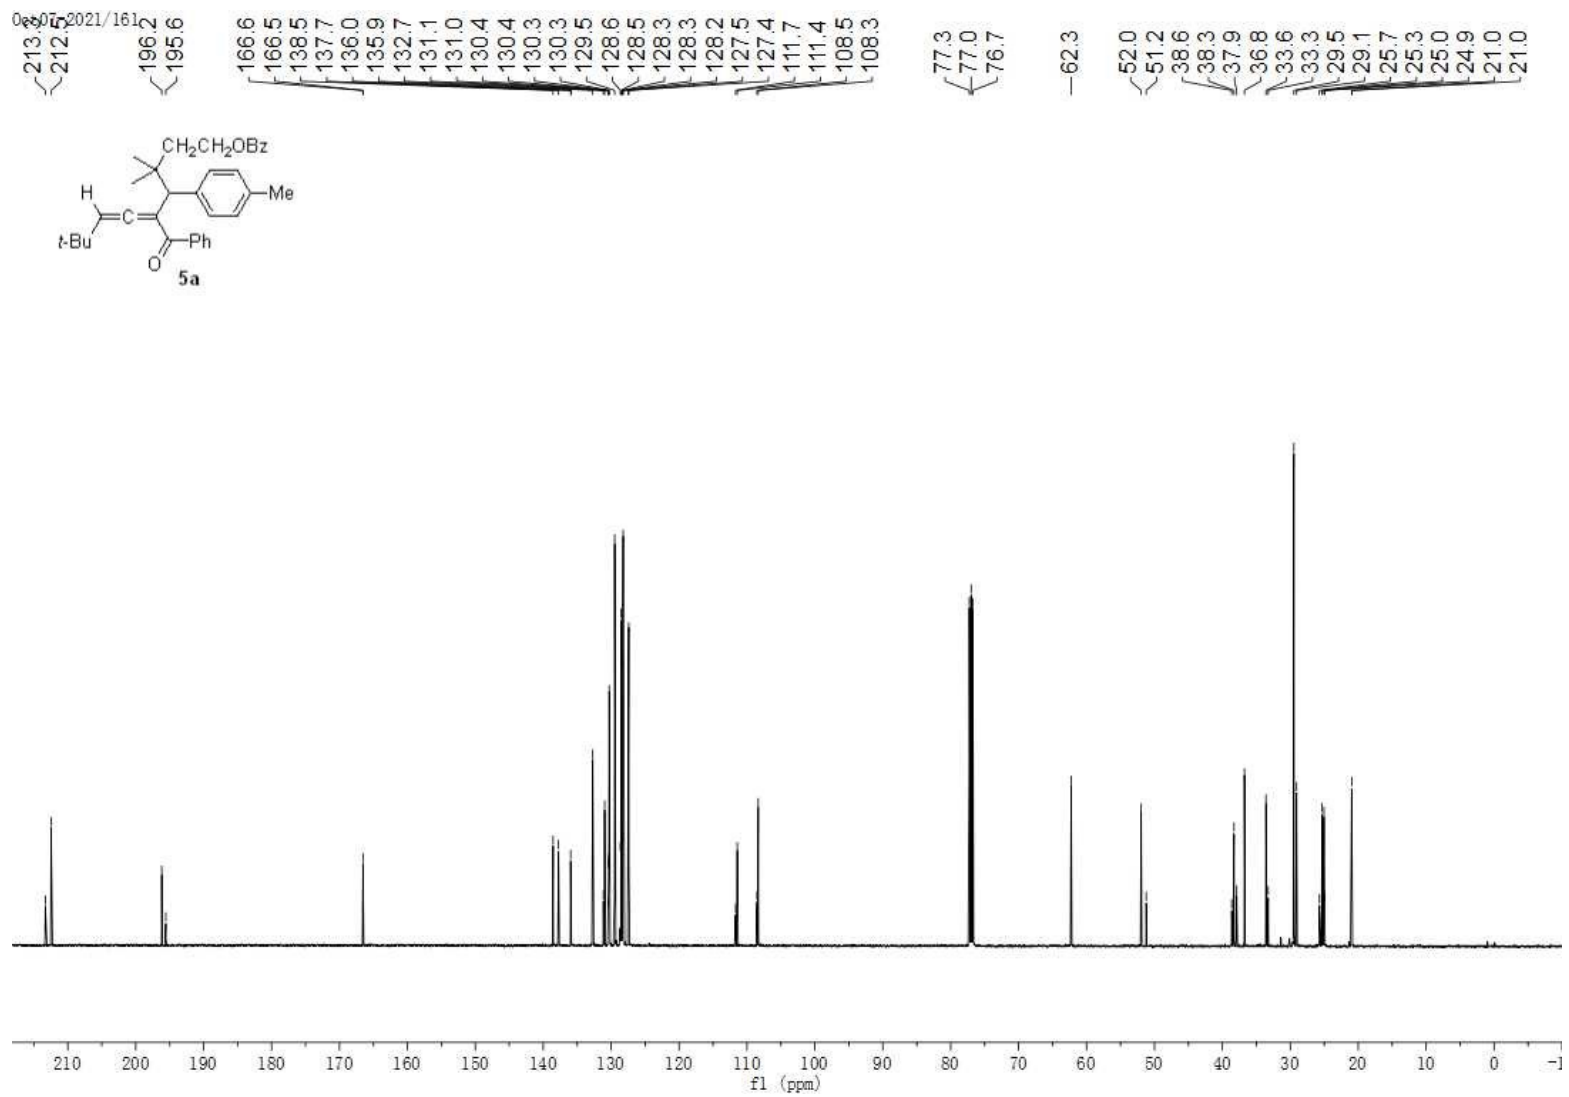

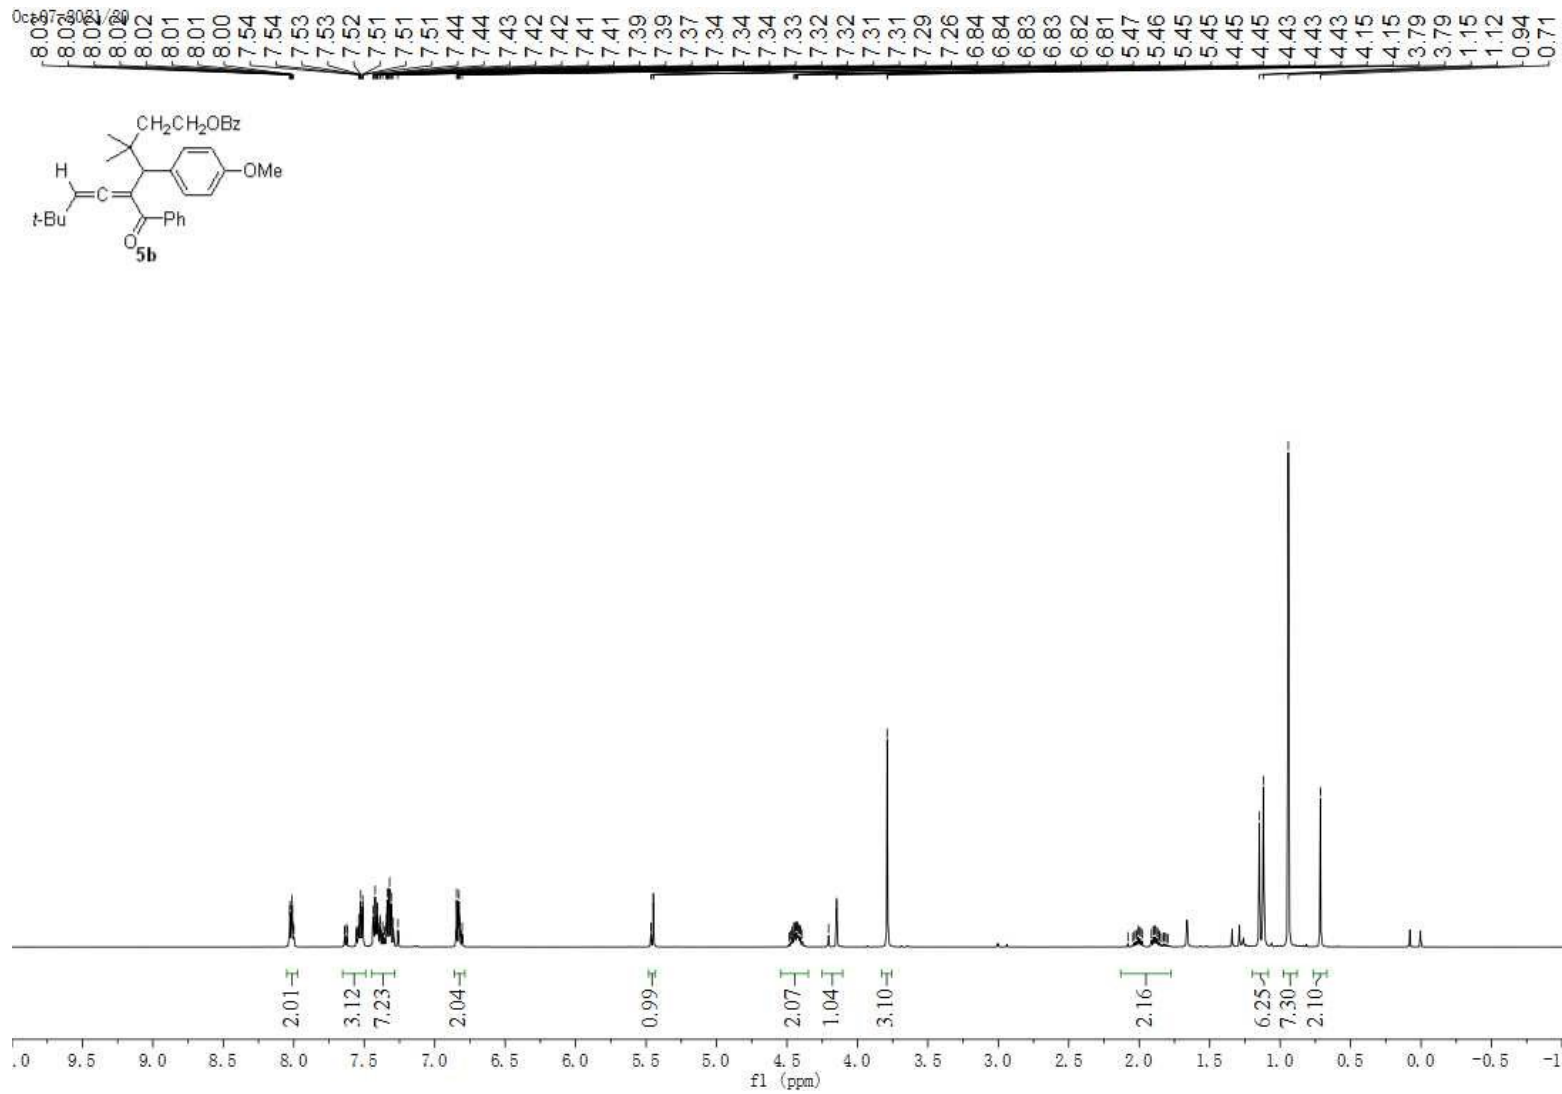

06-07-2021/21

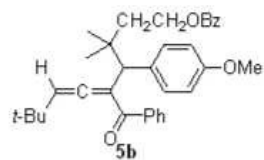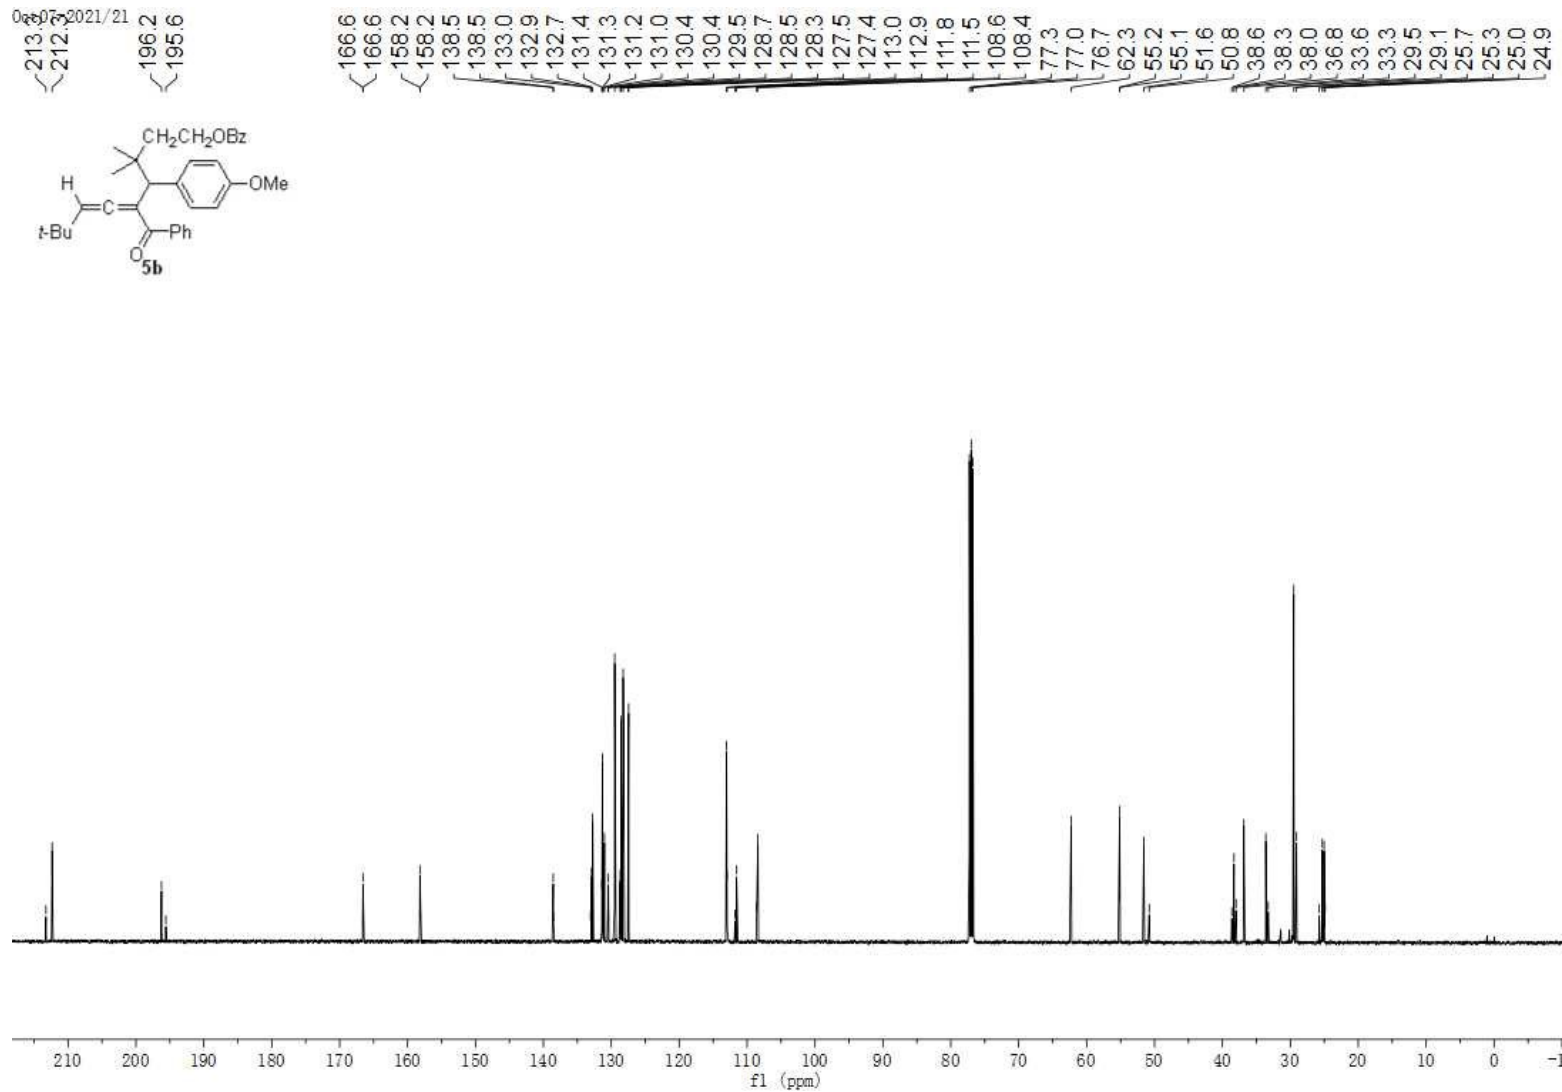

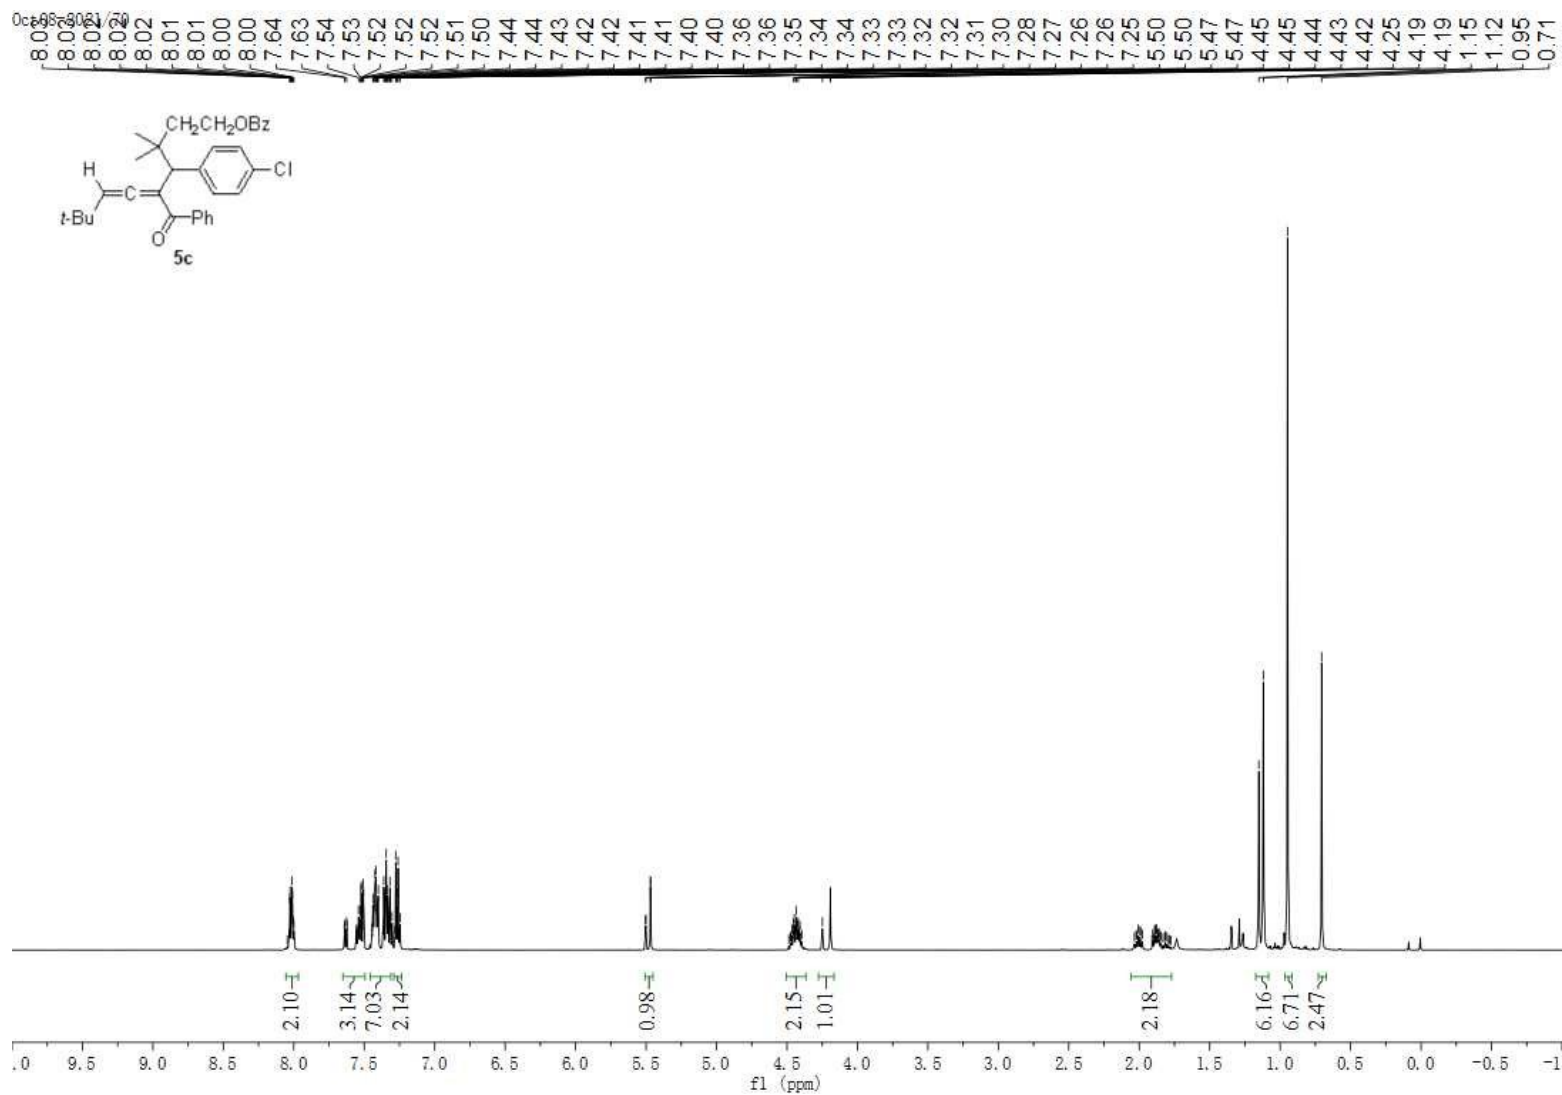

04-08-2021/71

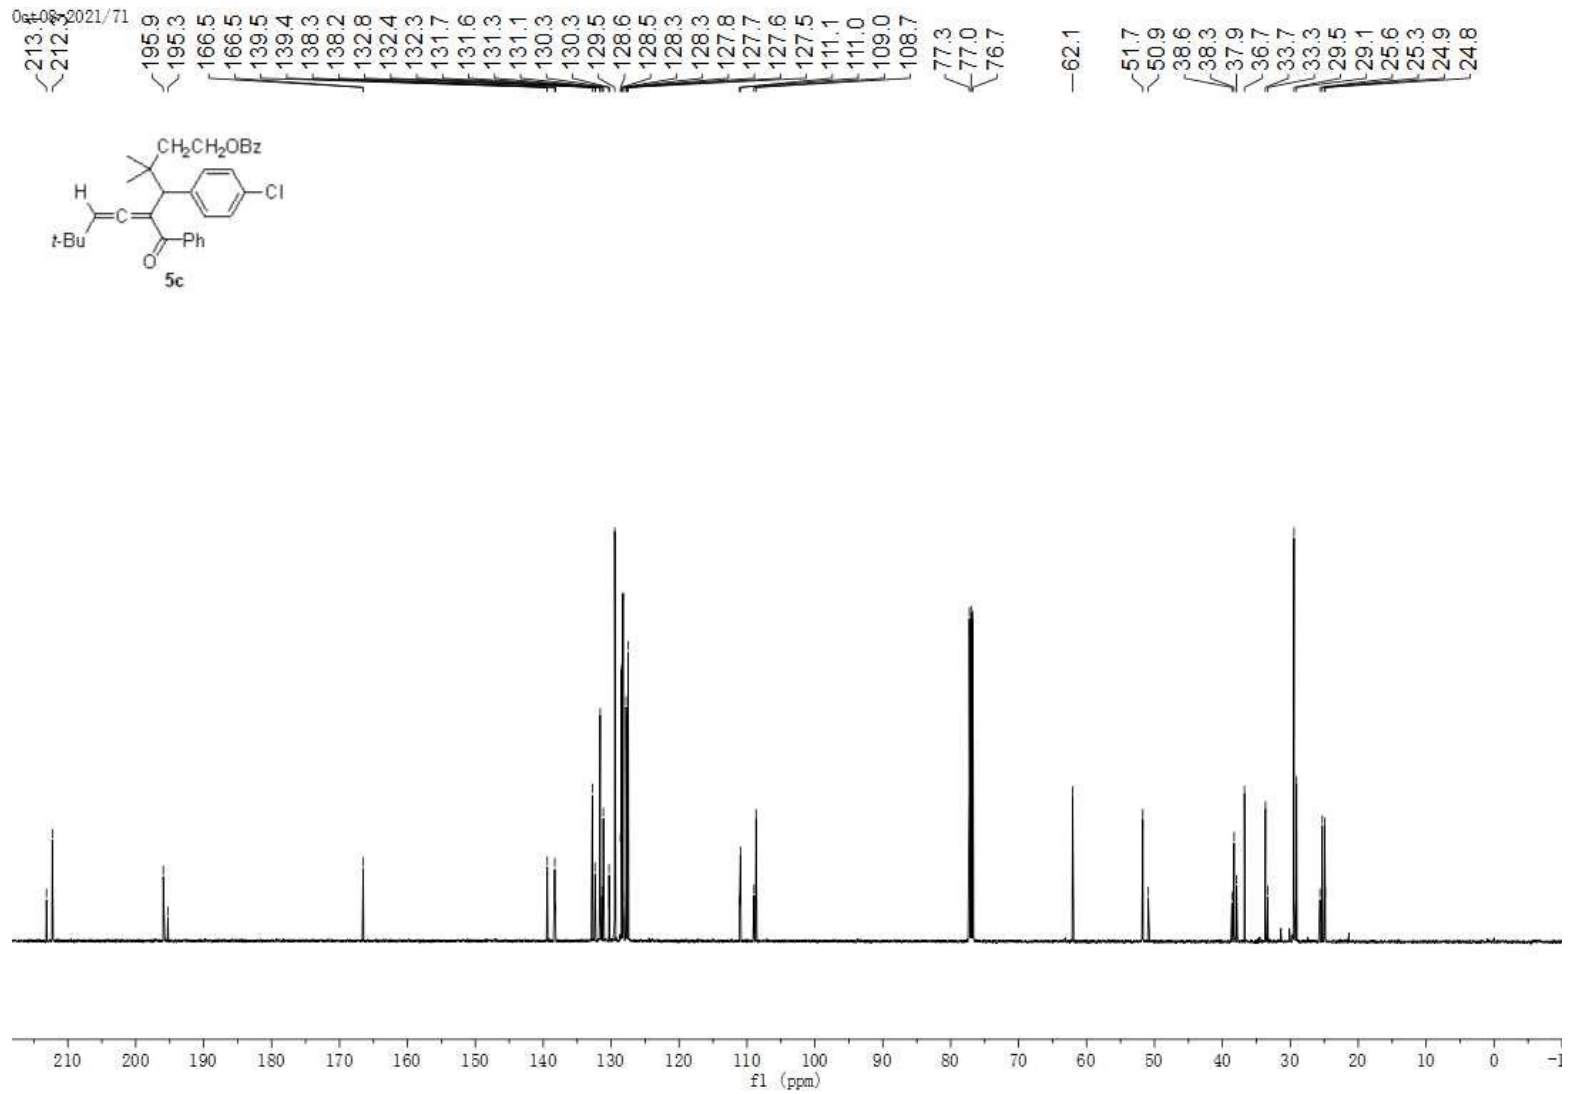

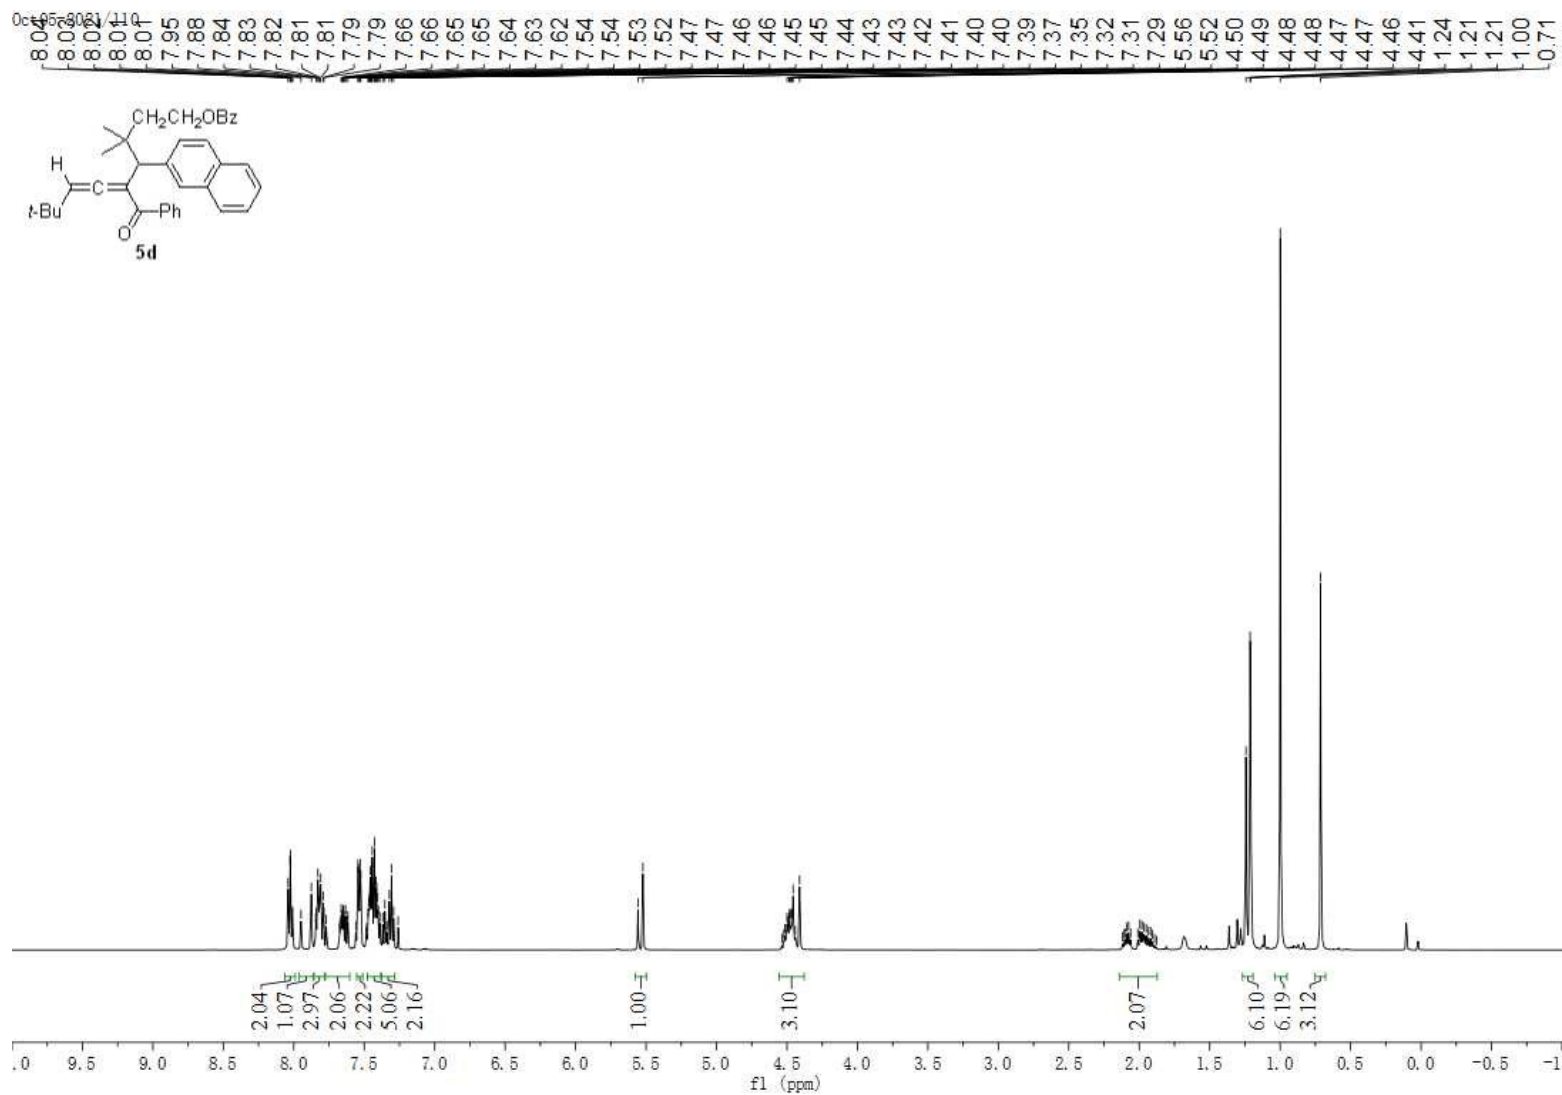



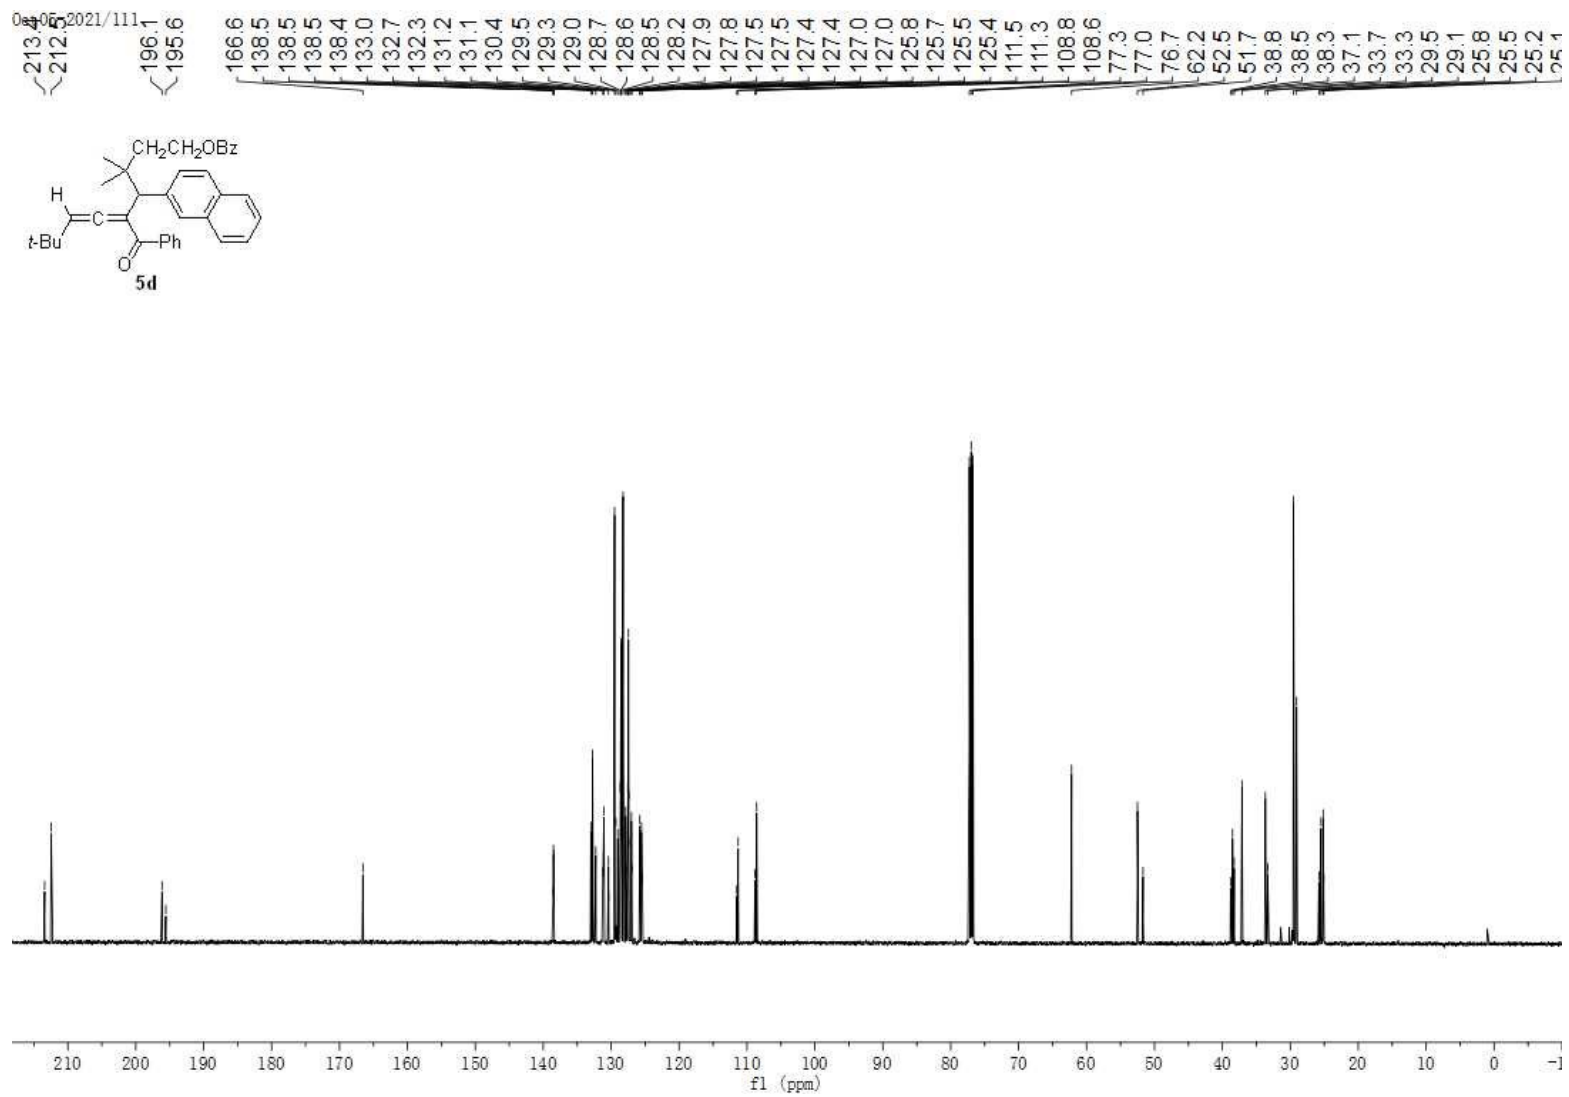

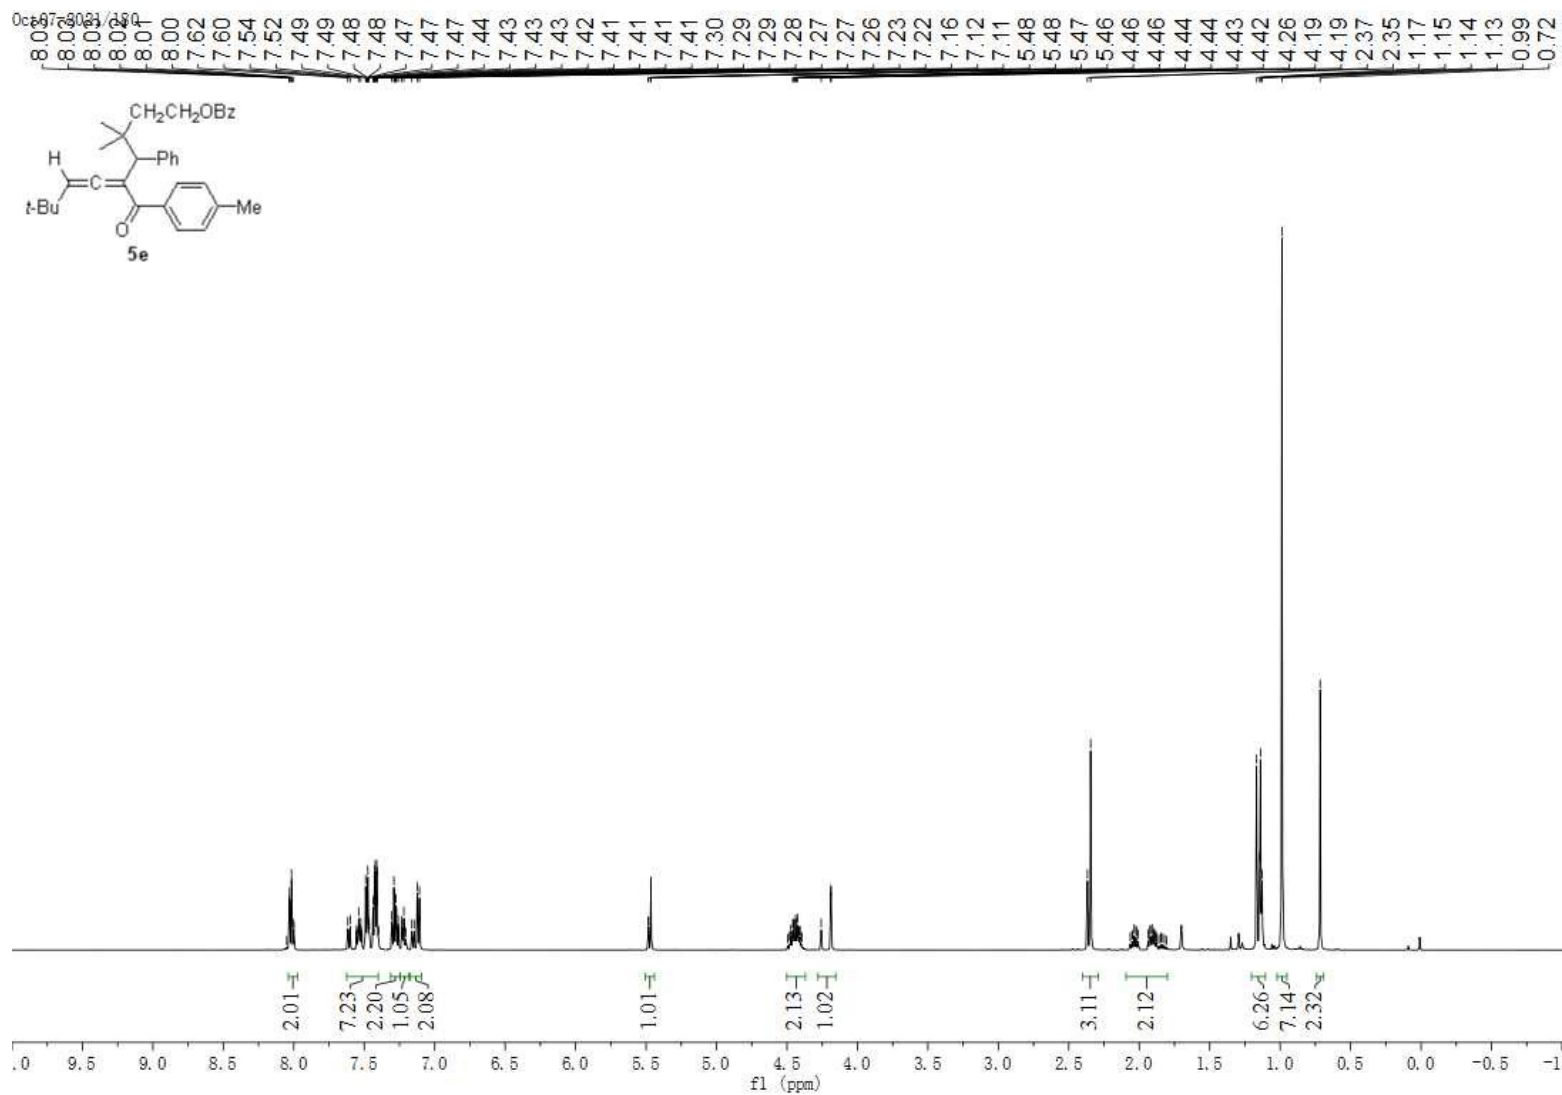

Oct 07 2021/181

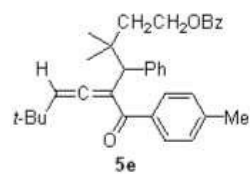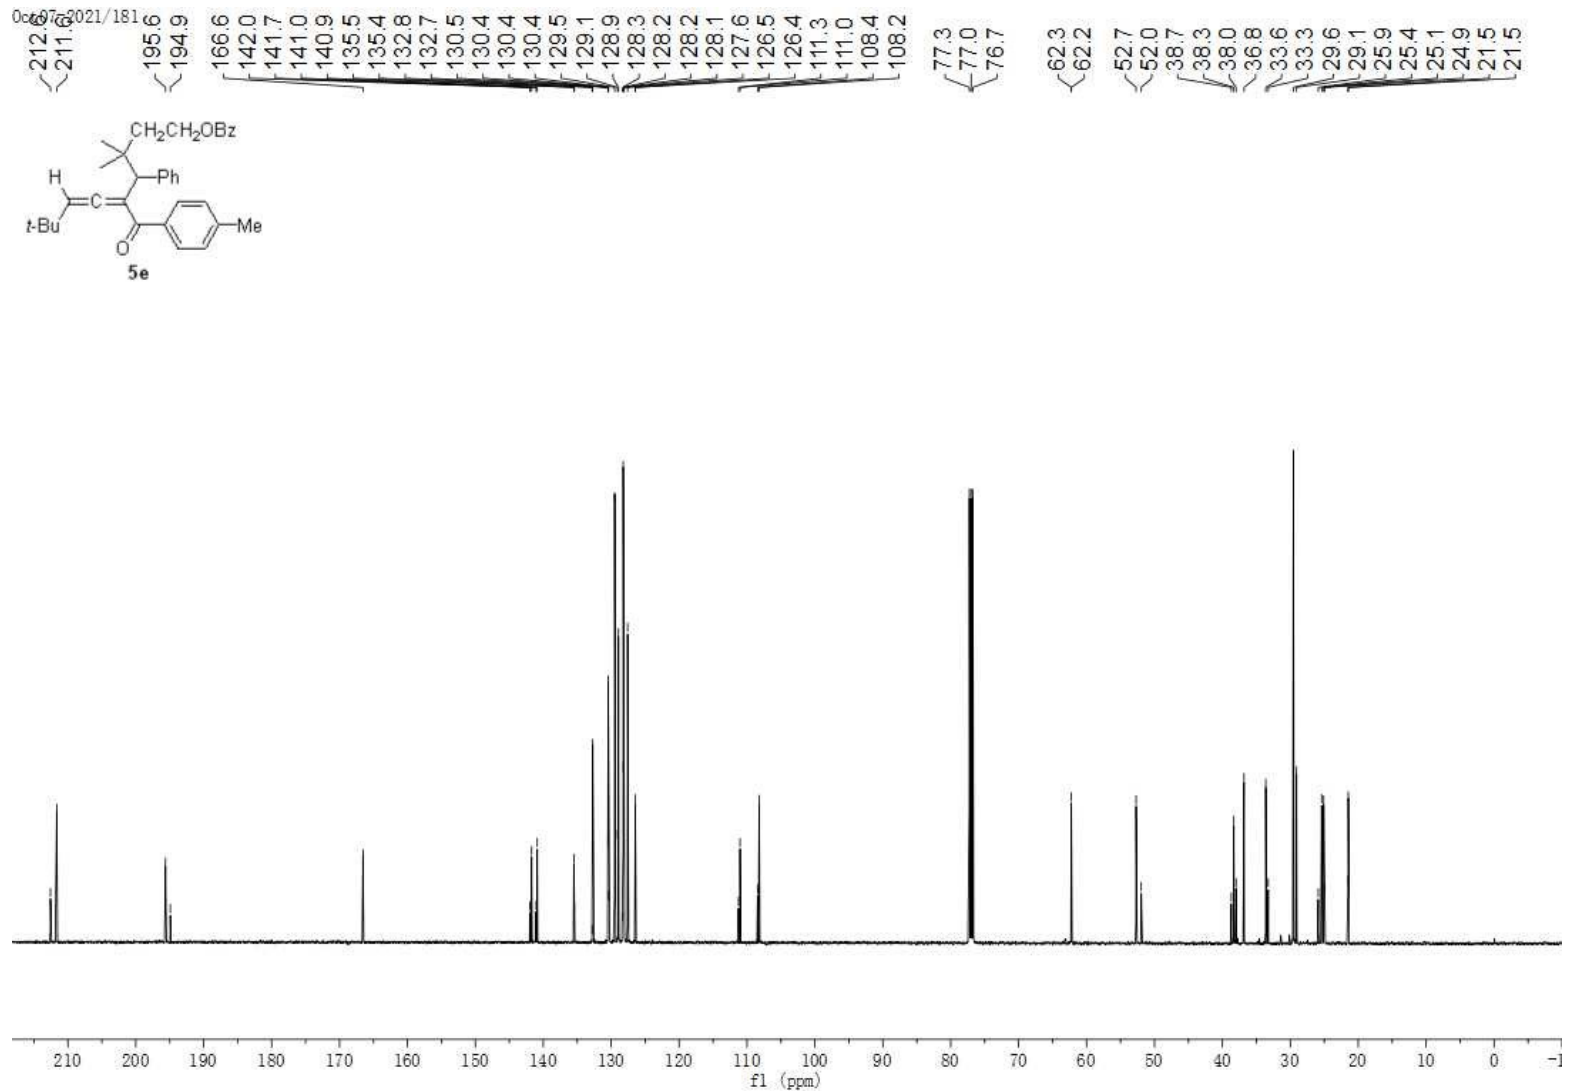

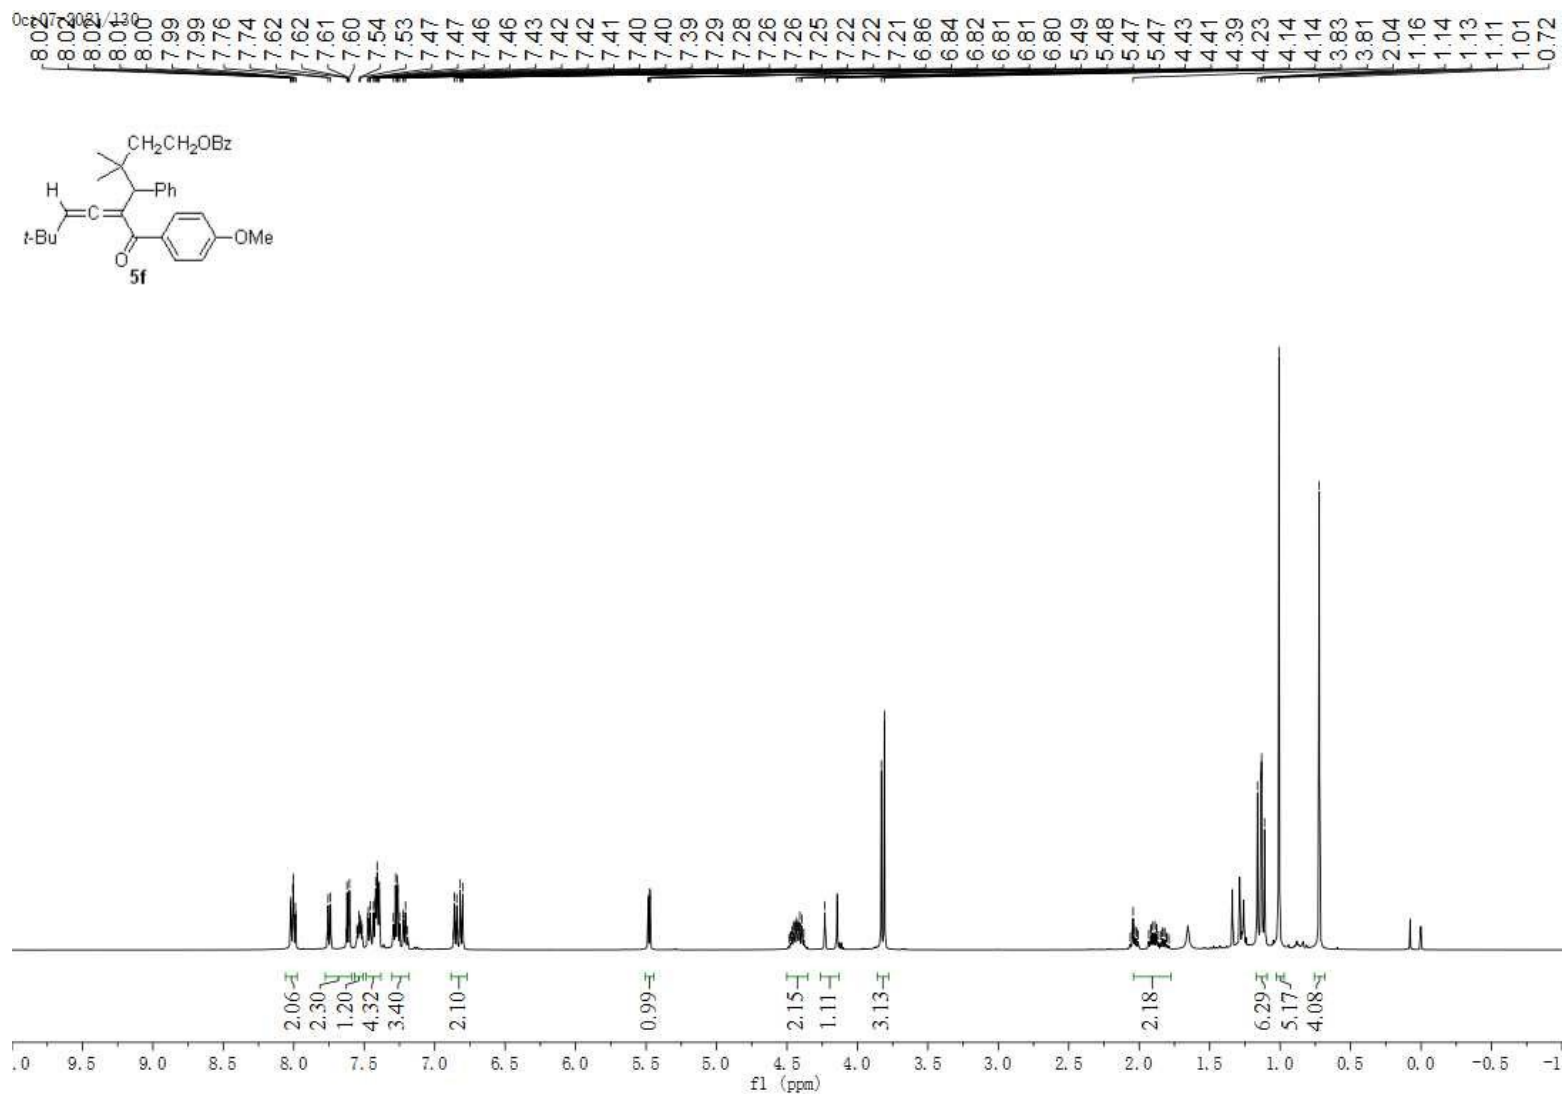

Oct 07 2021/131

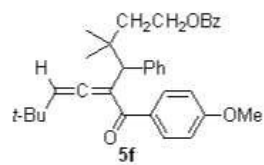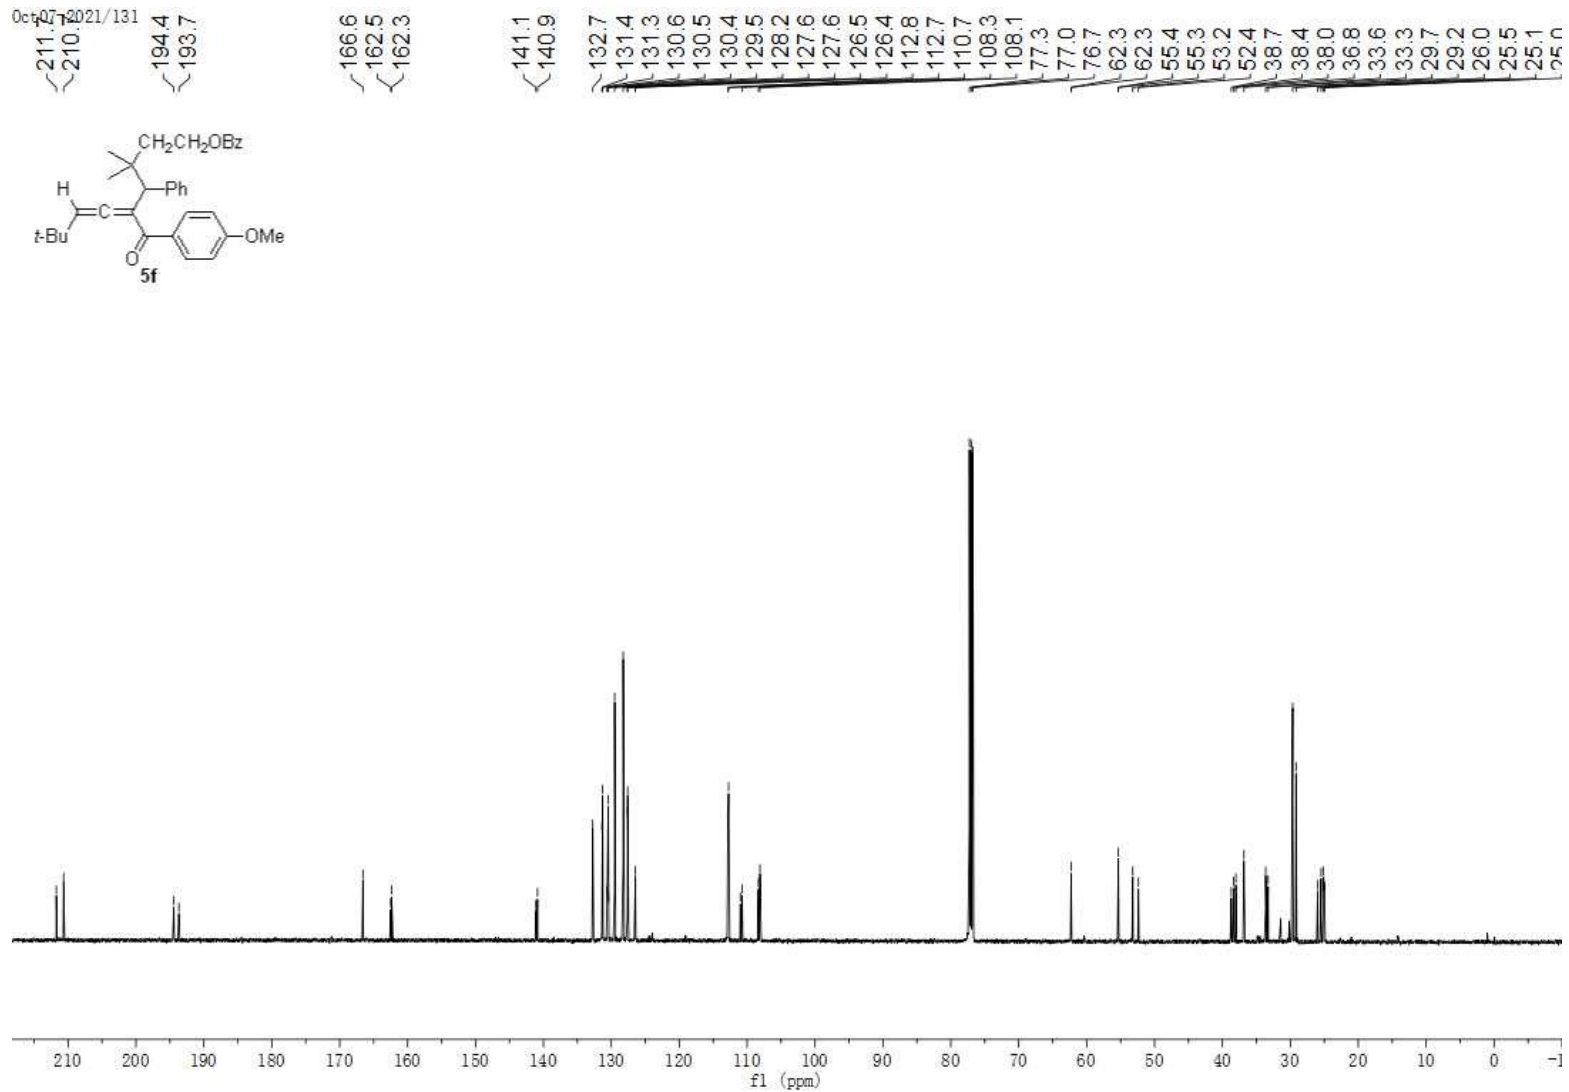

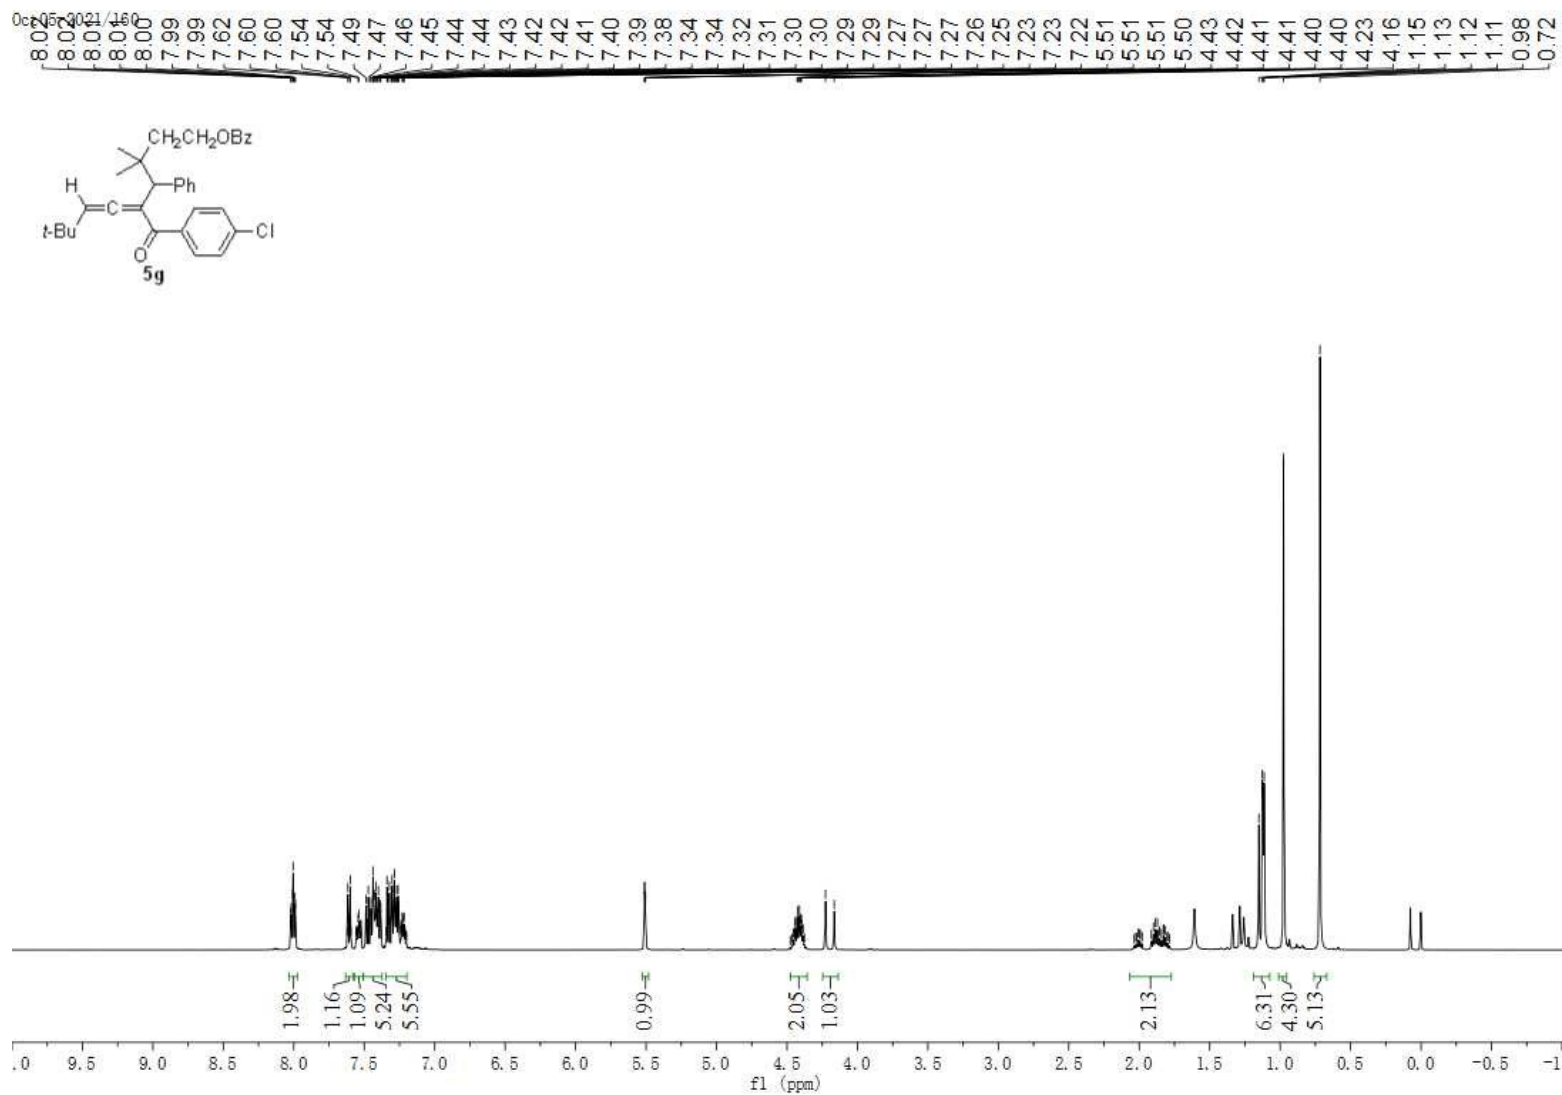

Oct-05-2021/161

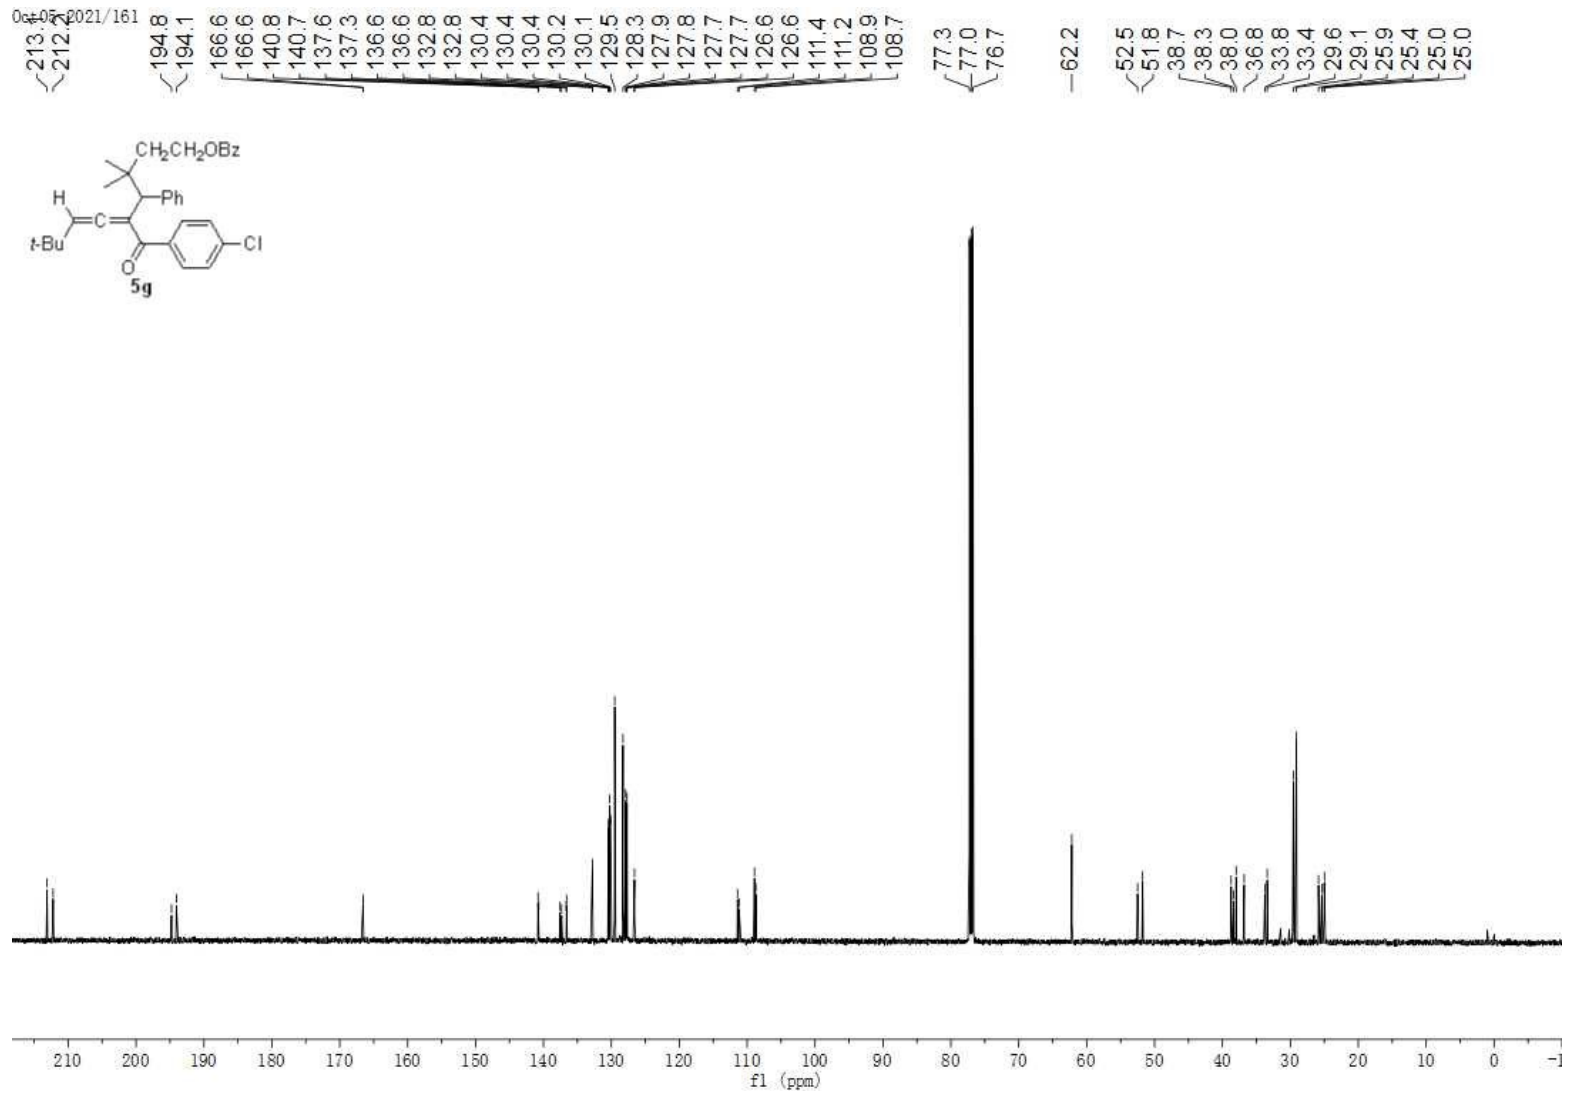

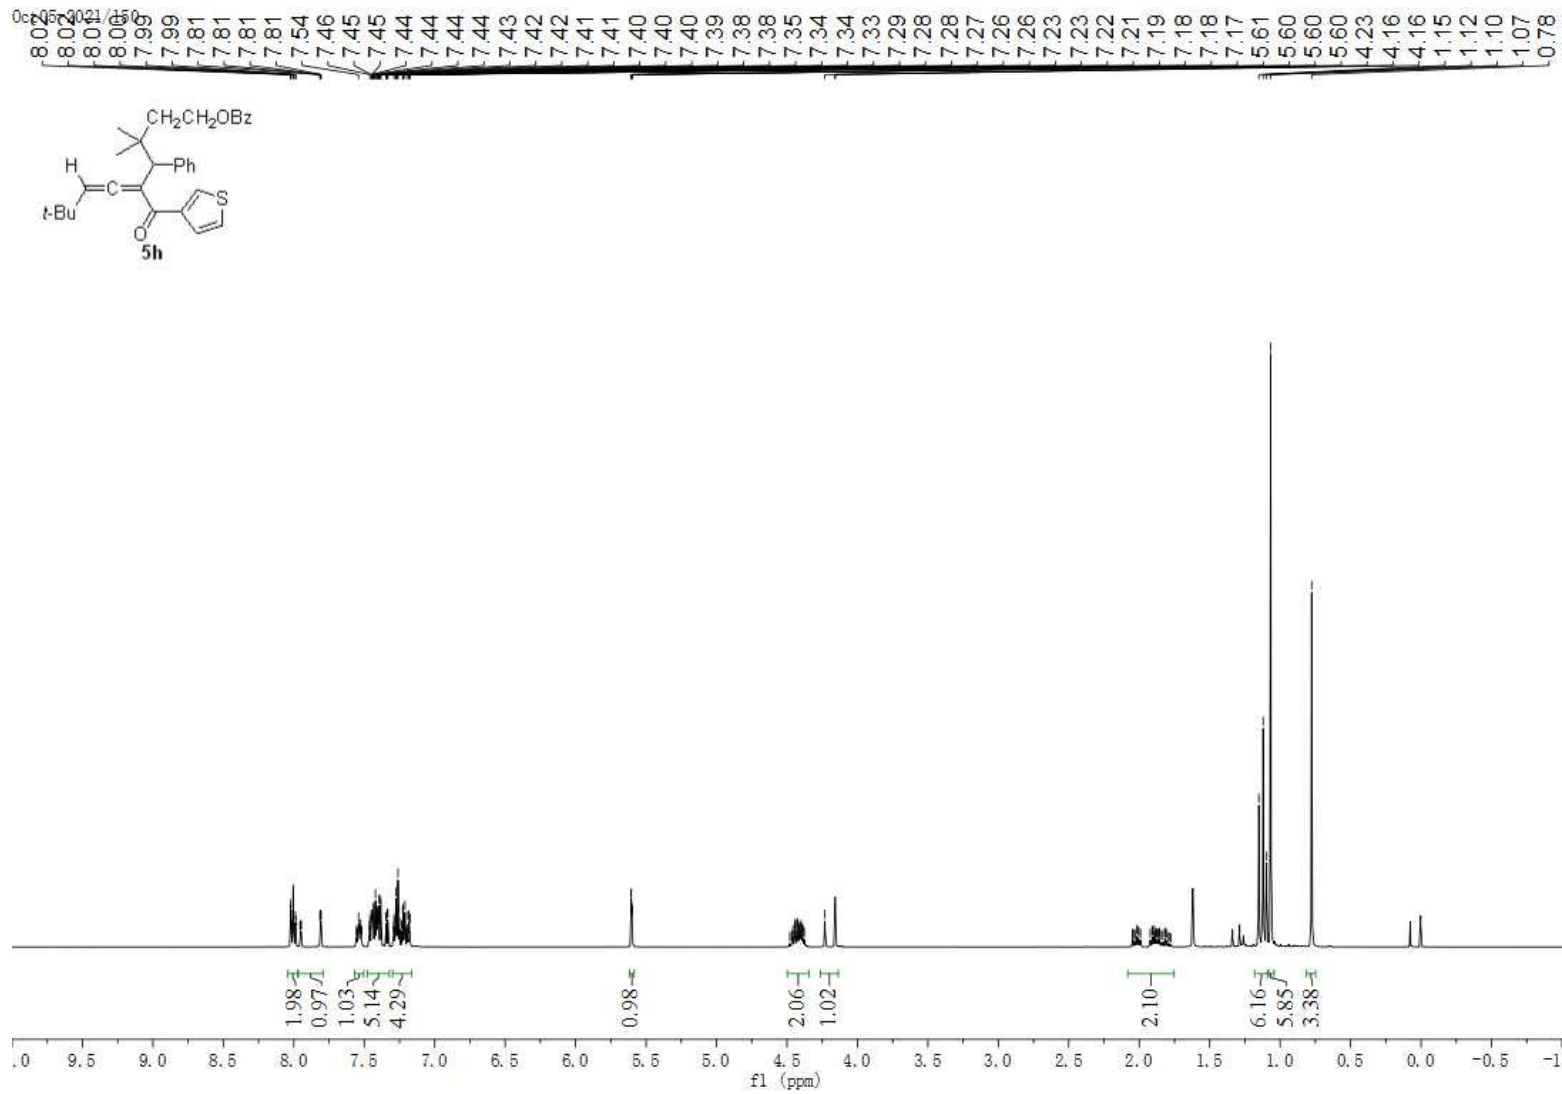



Oct 05 2021/151

212.8  
211.2

188.8  
188.0

166.6

141.0  
140.9  
140.8  
140.8

132.7  
131.5  
131.3  
130.5  
130.4  
130.4  
129.5  
128.3  
128.3  
128.3  
127.6  
127.6  
126.5  
126.5  
124.8  
124.7  
111.8  
108.9  
108.6  
77.3  
77.0  
76.7  
62.3  
62.2  
52.7  
52.0  
38.7  
38.3  
38.0  
36.8  
33.8  
33.4  
29.6  
29.2  
26.0  
25.4  
25.0  
24.0

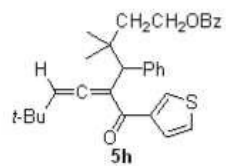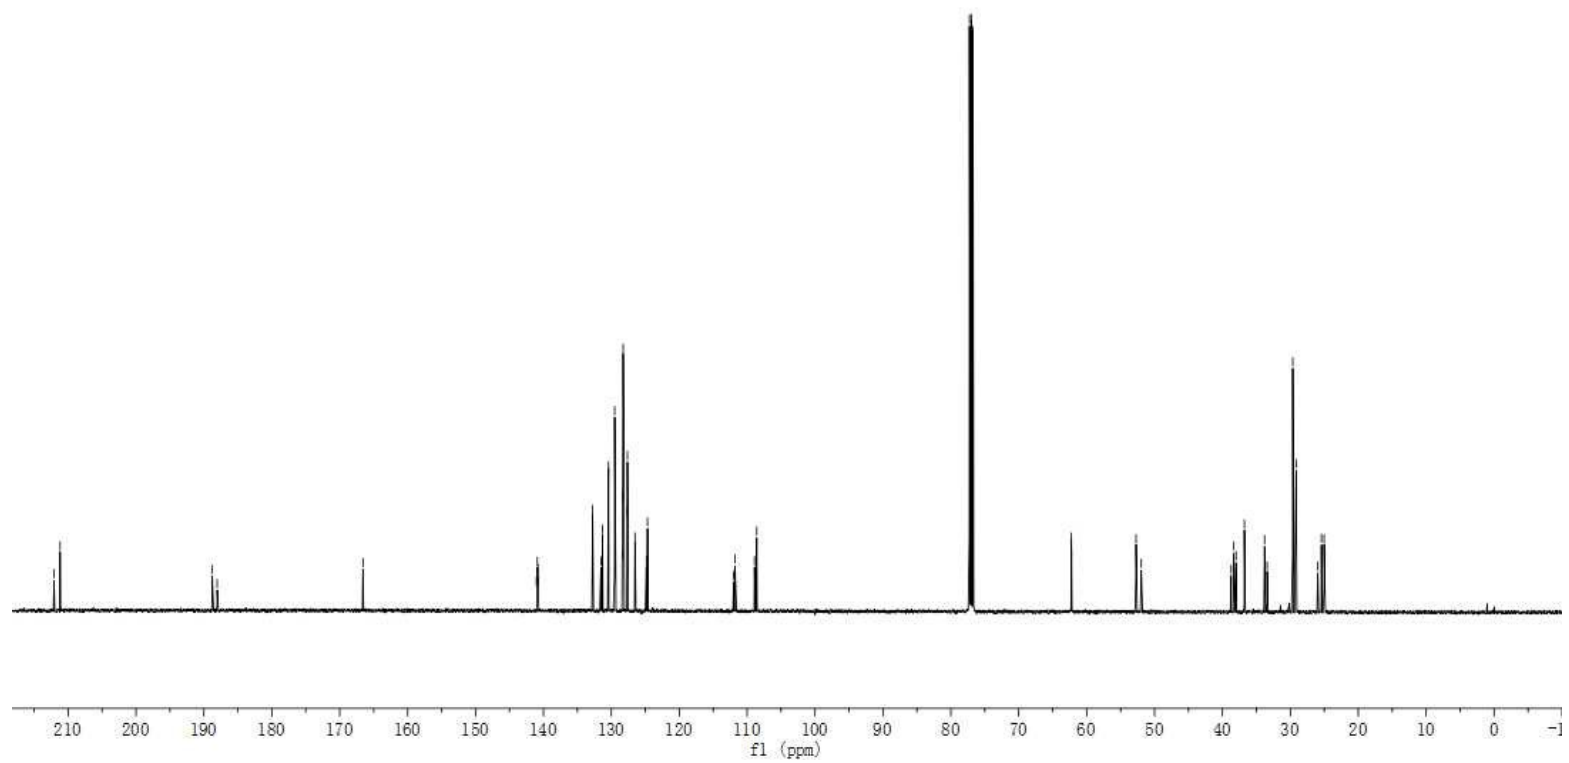

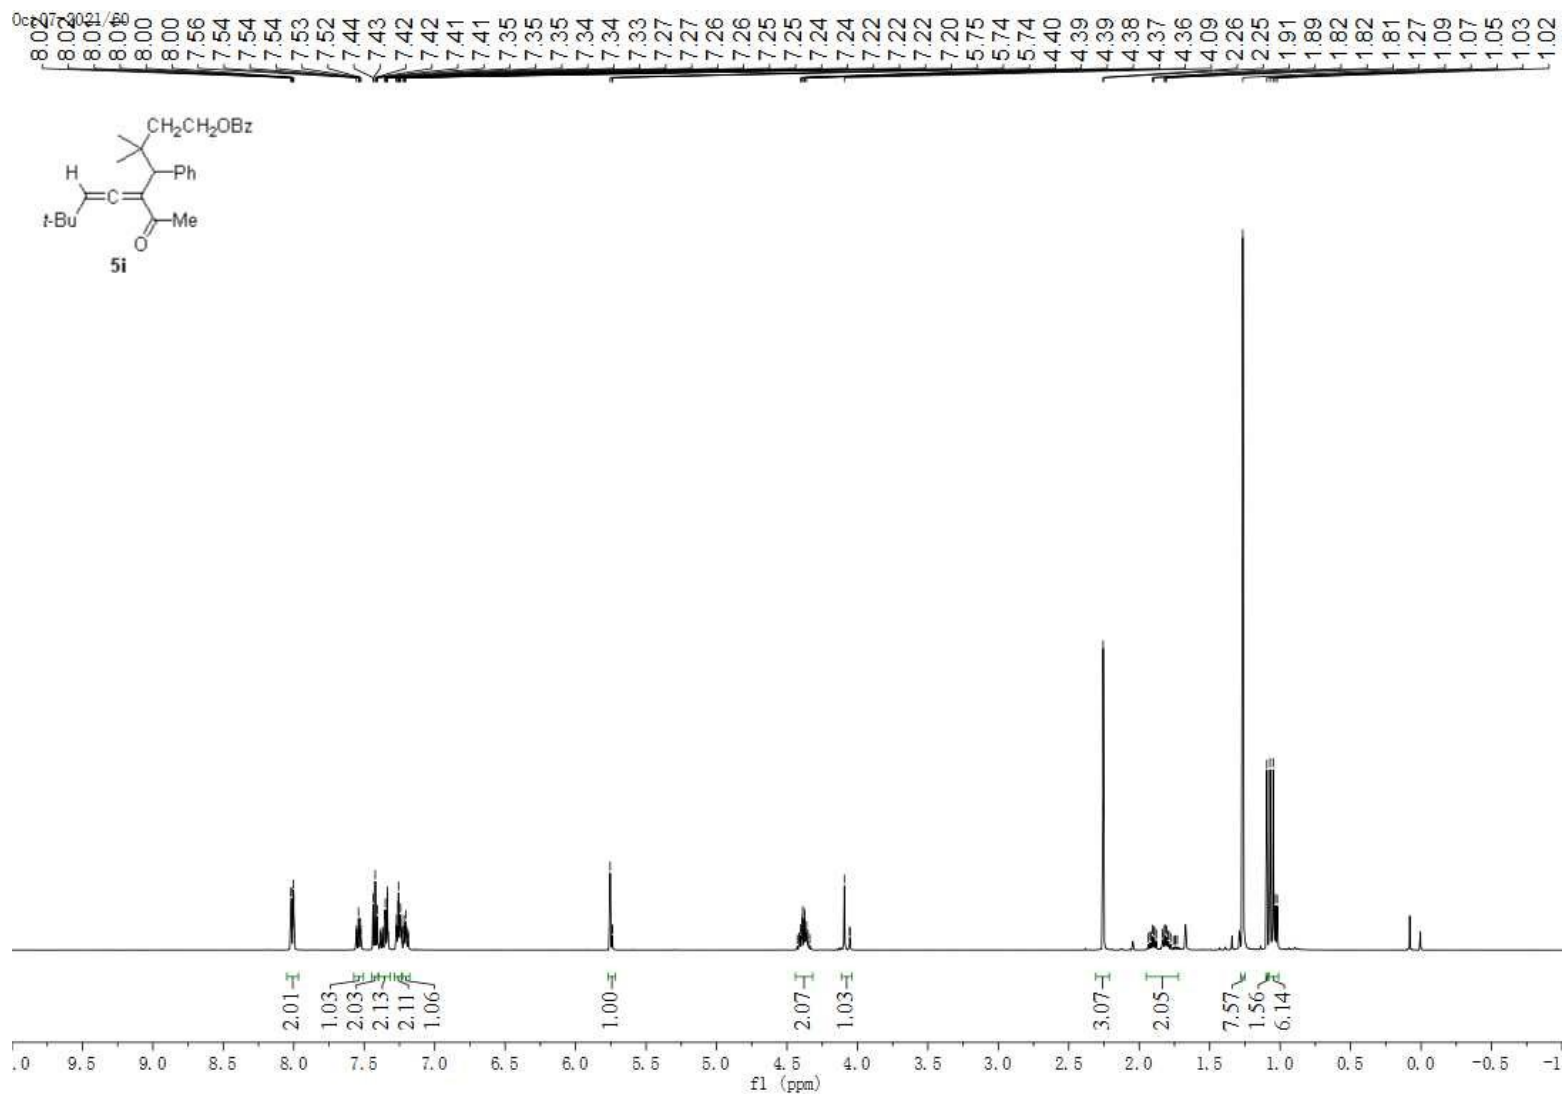

Oct 07 2021/61

211.6  
211.5  
198.5  
198.3

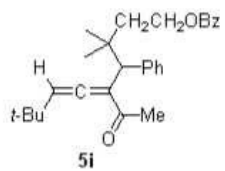

166.6  
166.5  
141.3  
140.9  
132.7  
130.4  
130.4  
130.3  
129.5  
128.2  
127.6  
127.5  
126.4  
112.5  
112.4  
108.1  
107.7

77.3  
77.0  
76.7  
62.3  
62.2  
50.3  
50.1  
38.6  
38.2  
37.4  
36.6  
34.0  
33.7  
29.9  
29.5  
26.5  
26.4  
25.2  
25.1  
24.8

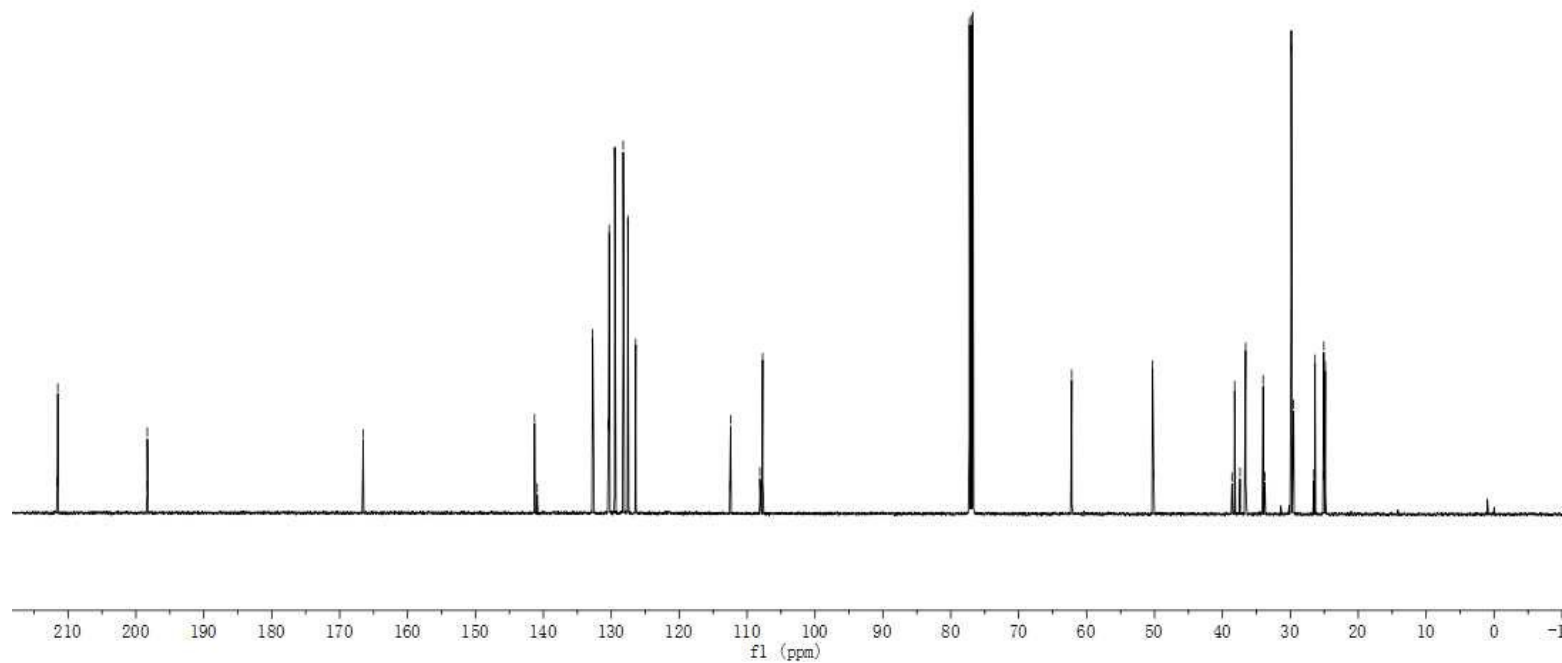

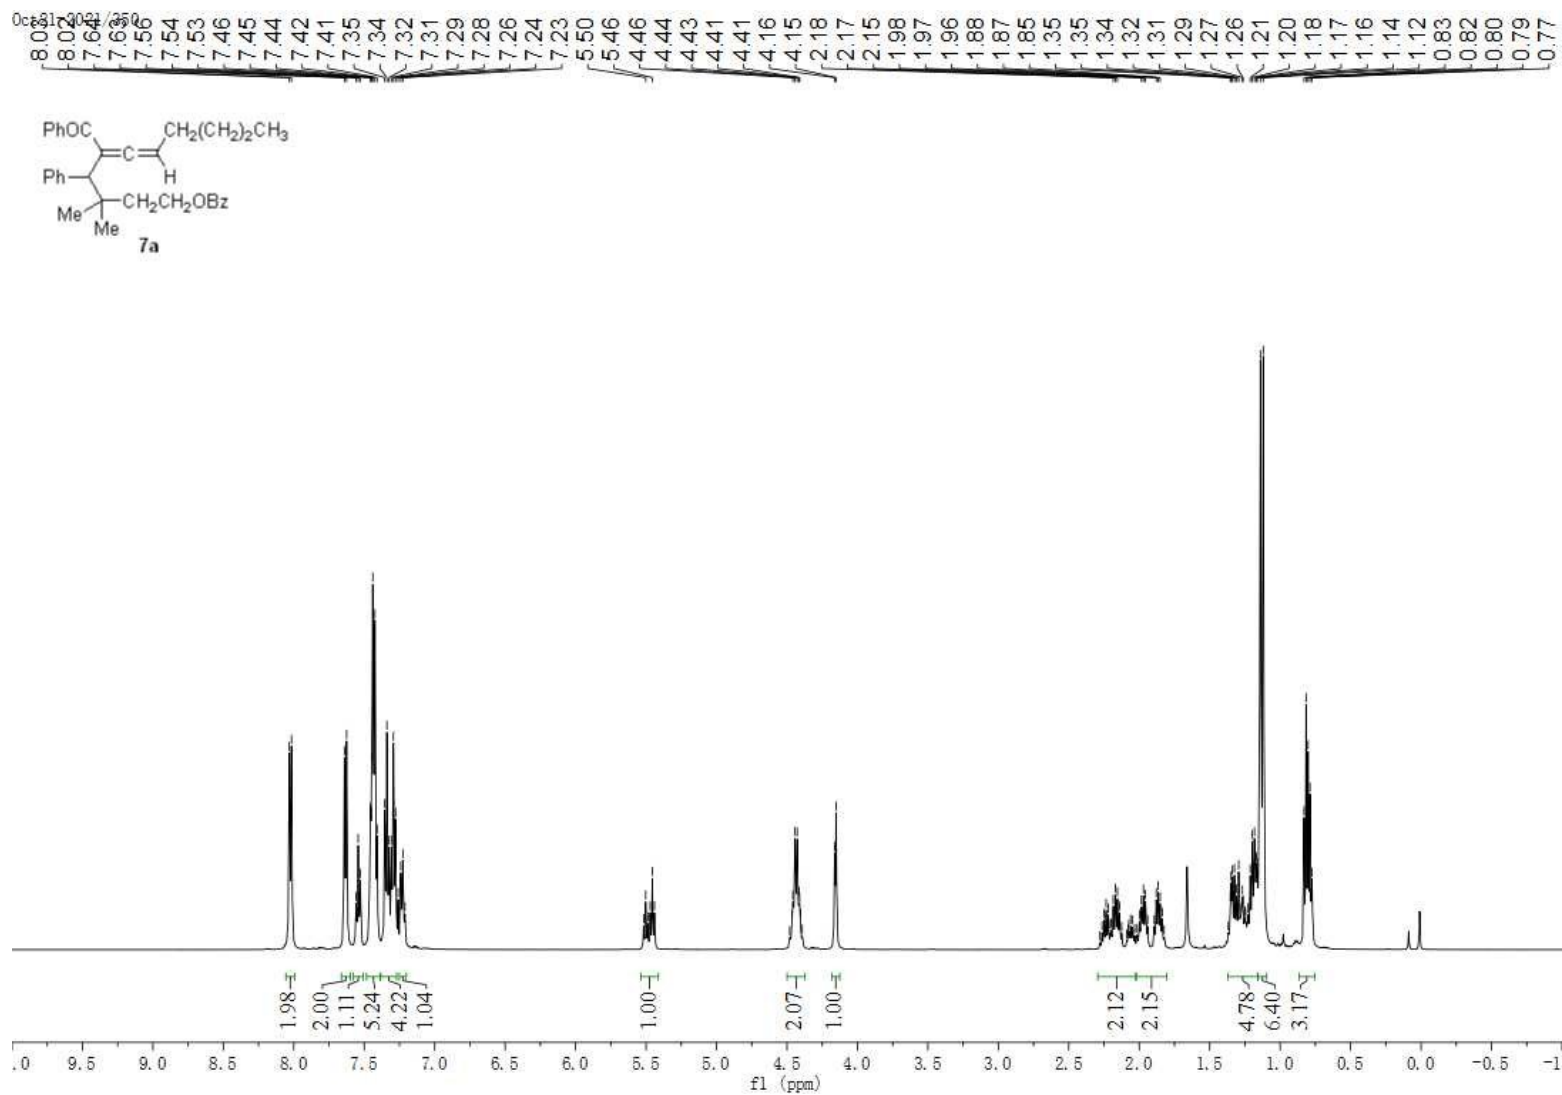

Oct 23, 2021/351

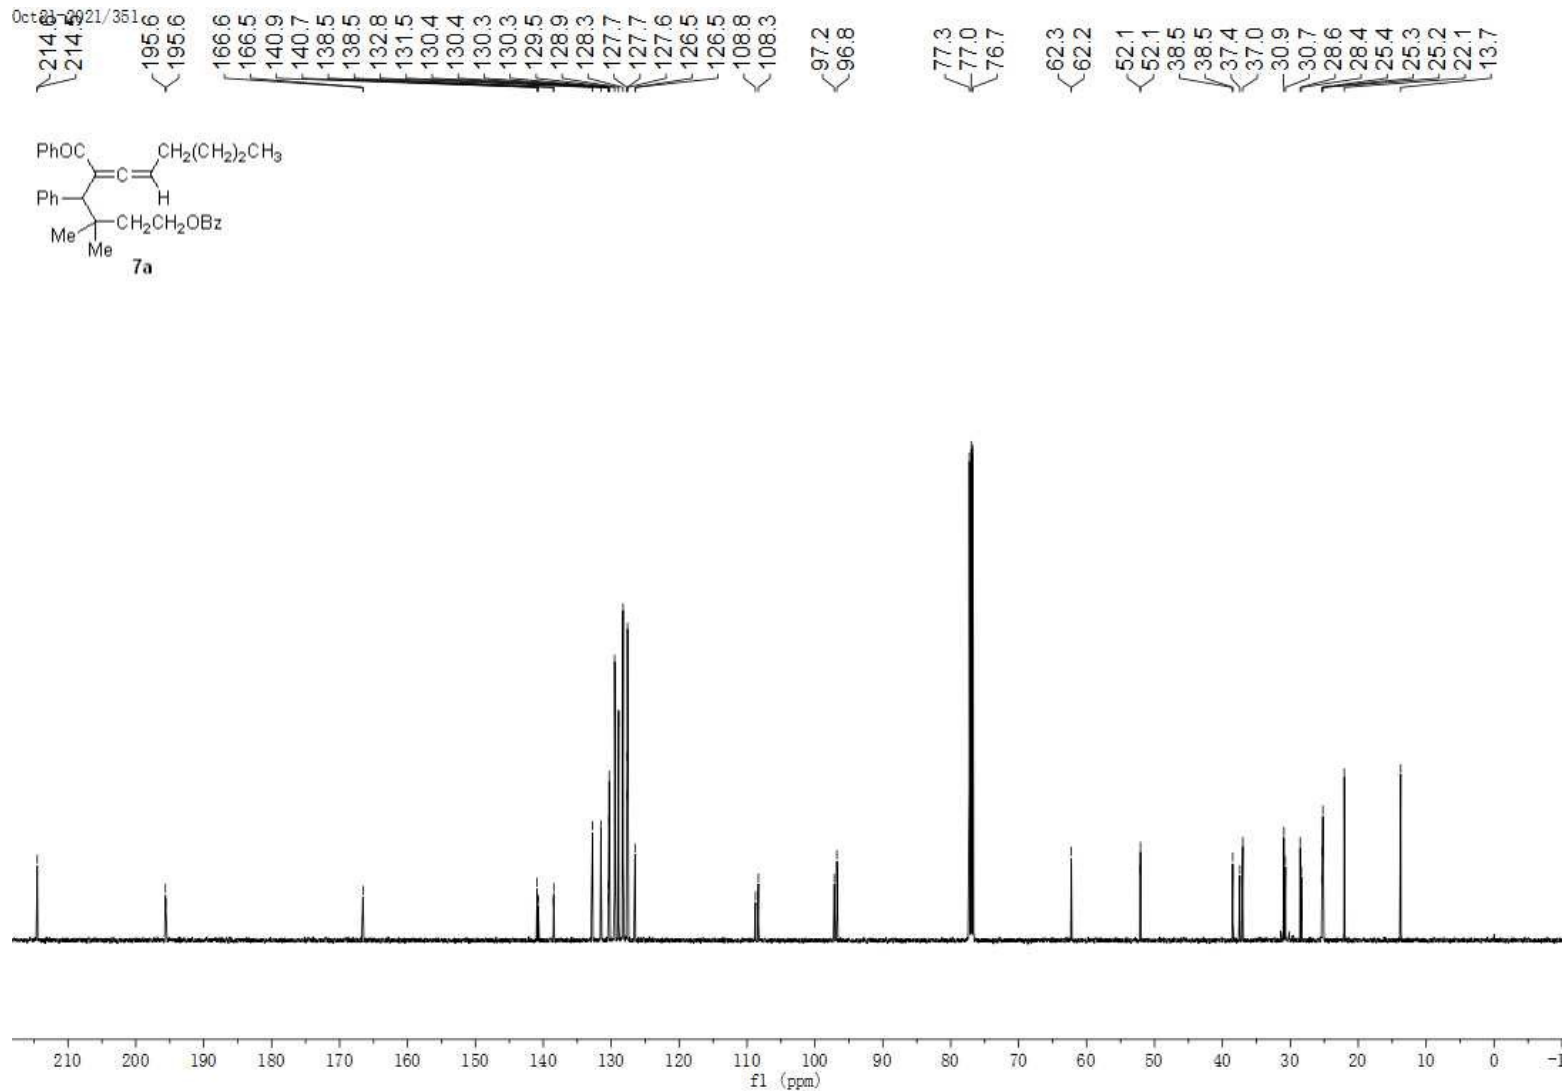

Nov 13-2021 / 20  
 8.03  
 8.01  
 7.66  
 7.66  
 7.65  
 7.64  
 7.64  
 7.55  
 7.53  
 7.52  
 7.52  
 7.46  
 7.46  
 7.45  
 7.45  
 7.44  
 7.44  
 7.43  
 7.42  
 7.40  
 7.37  
 7.37  
 7.35  
 7.35  
 7.34  
 7.34  
 7.32  
 7.31  
 7.30  
 7.29  
 7.29  
 7.28  
 7.25  
 7.24  
 7.23  
 5.54  
 5.49  
 4.46  
 4.46  
 4.45  
 4.44  
 4.43  
 4.43  
 4.15  
 4.15  
 4.09  
 4.02  
 4.01  
 1.96  
 1.95  
 1.92  
 1.88  
 1.87  
 1.13  
 1.12

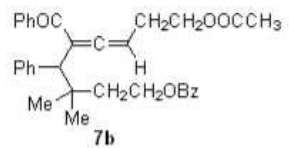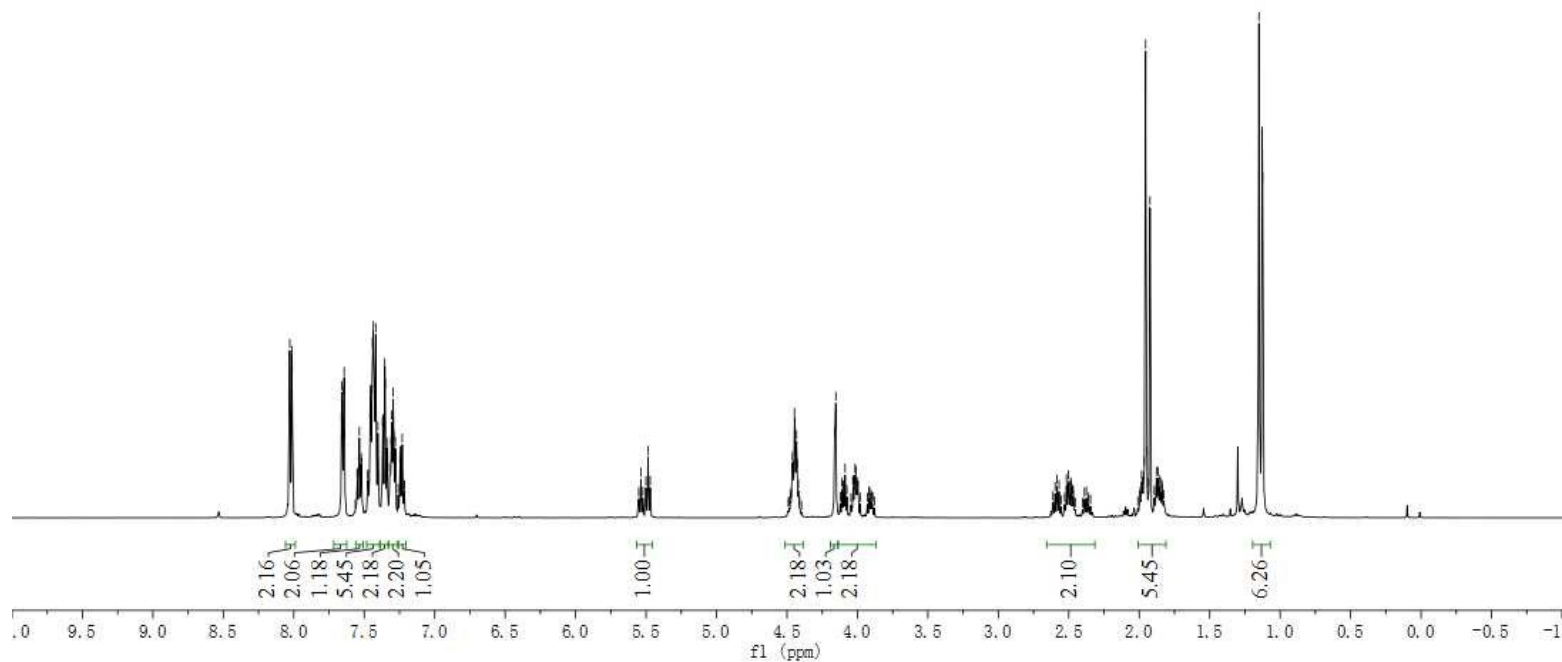

Nov 13 2021/21

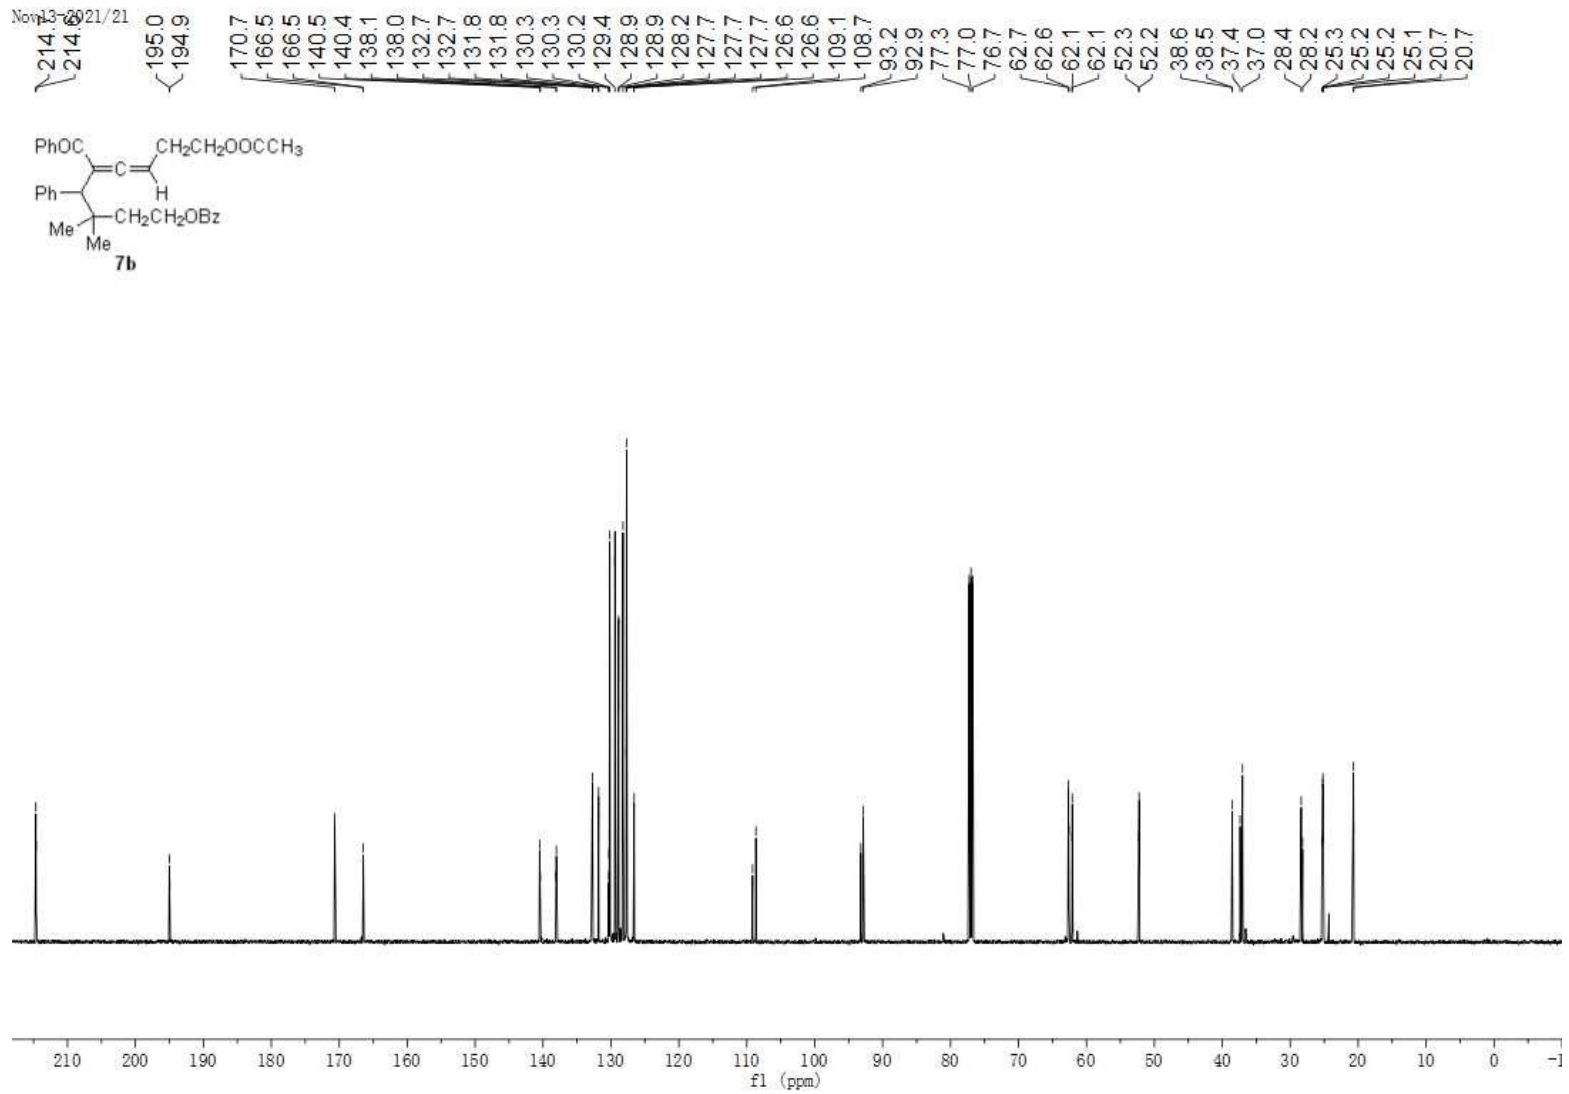

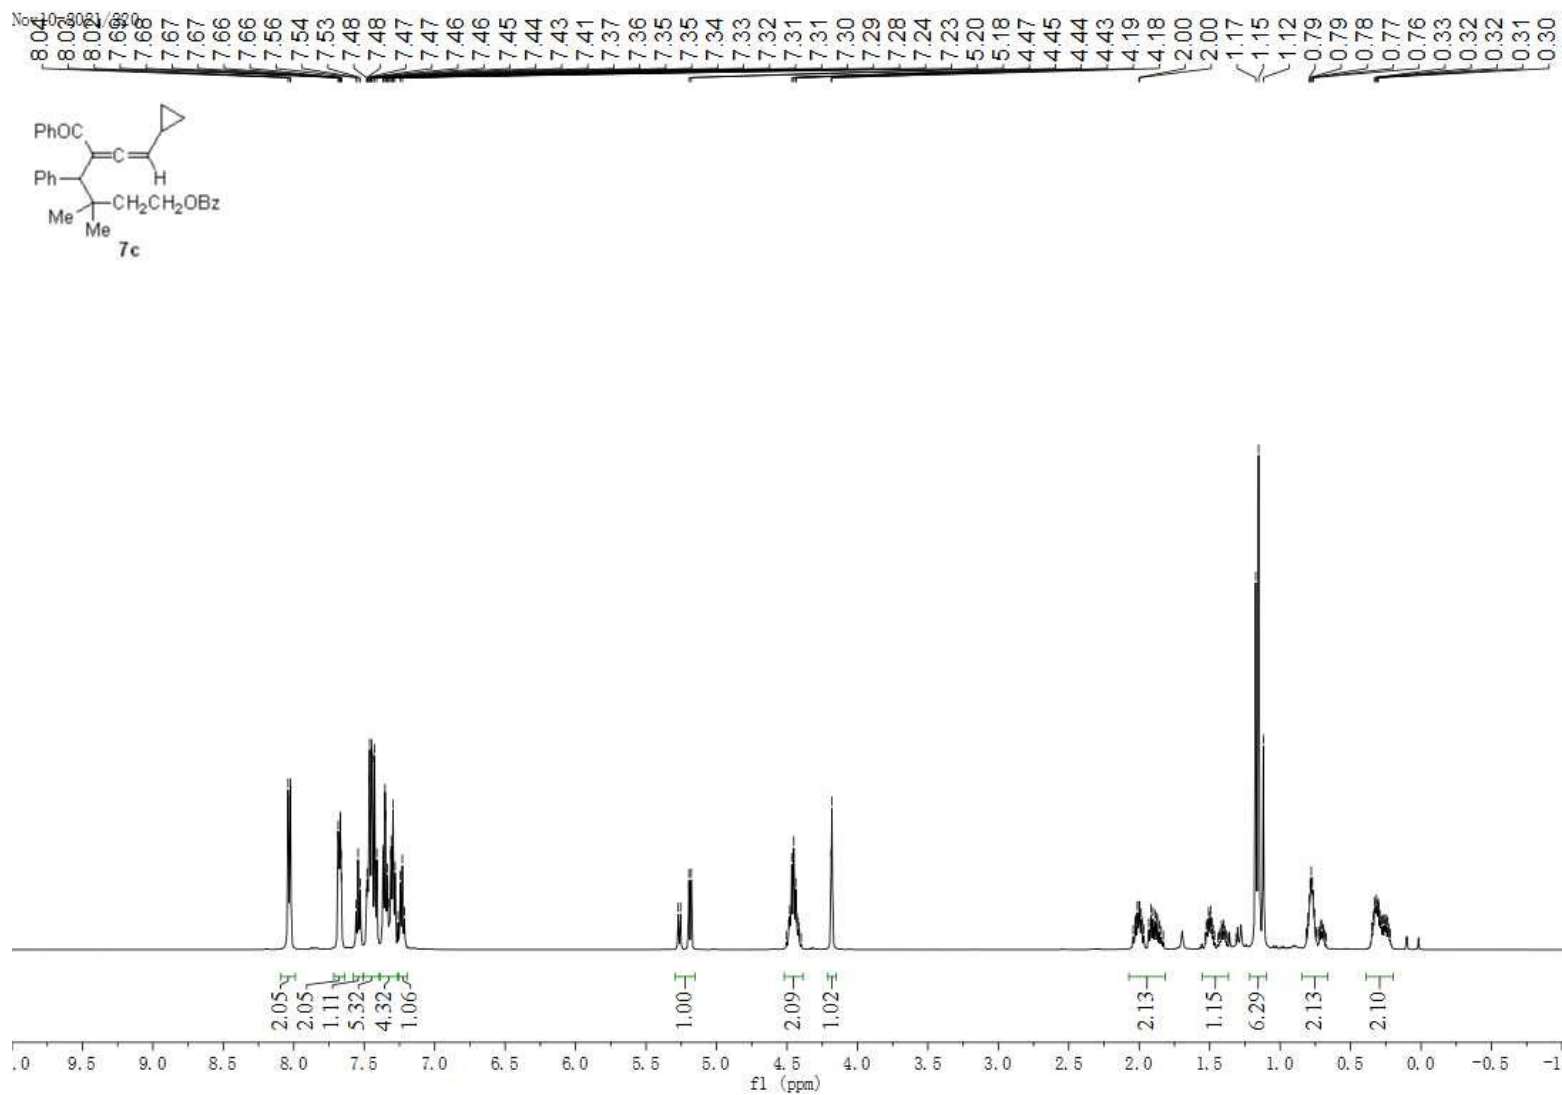



Nov 10 2021/221

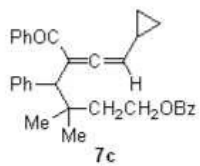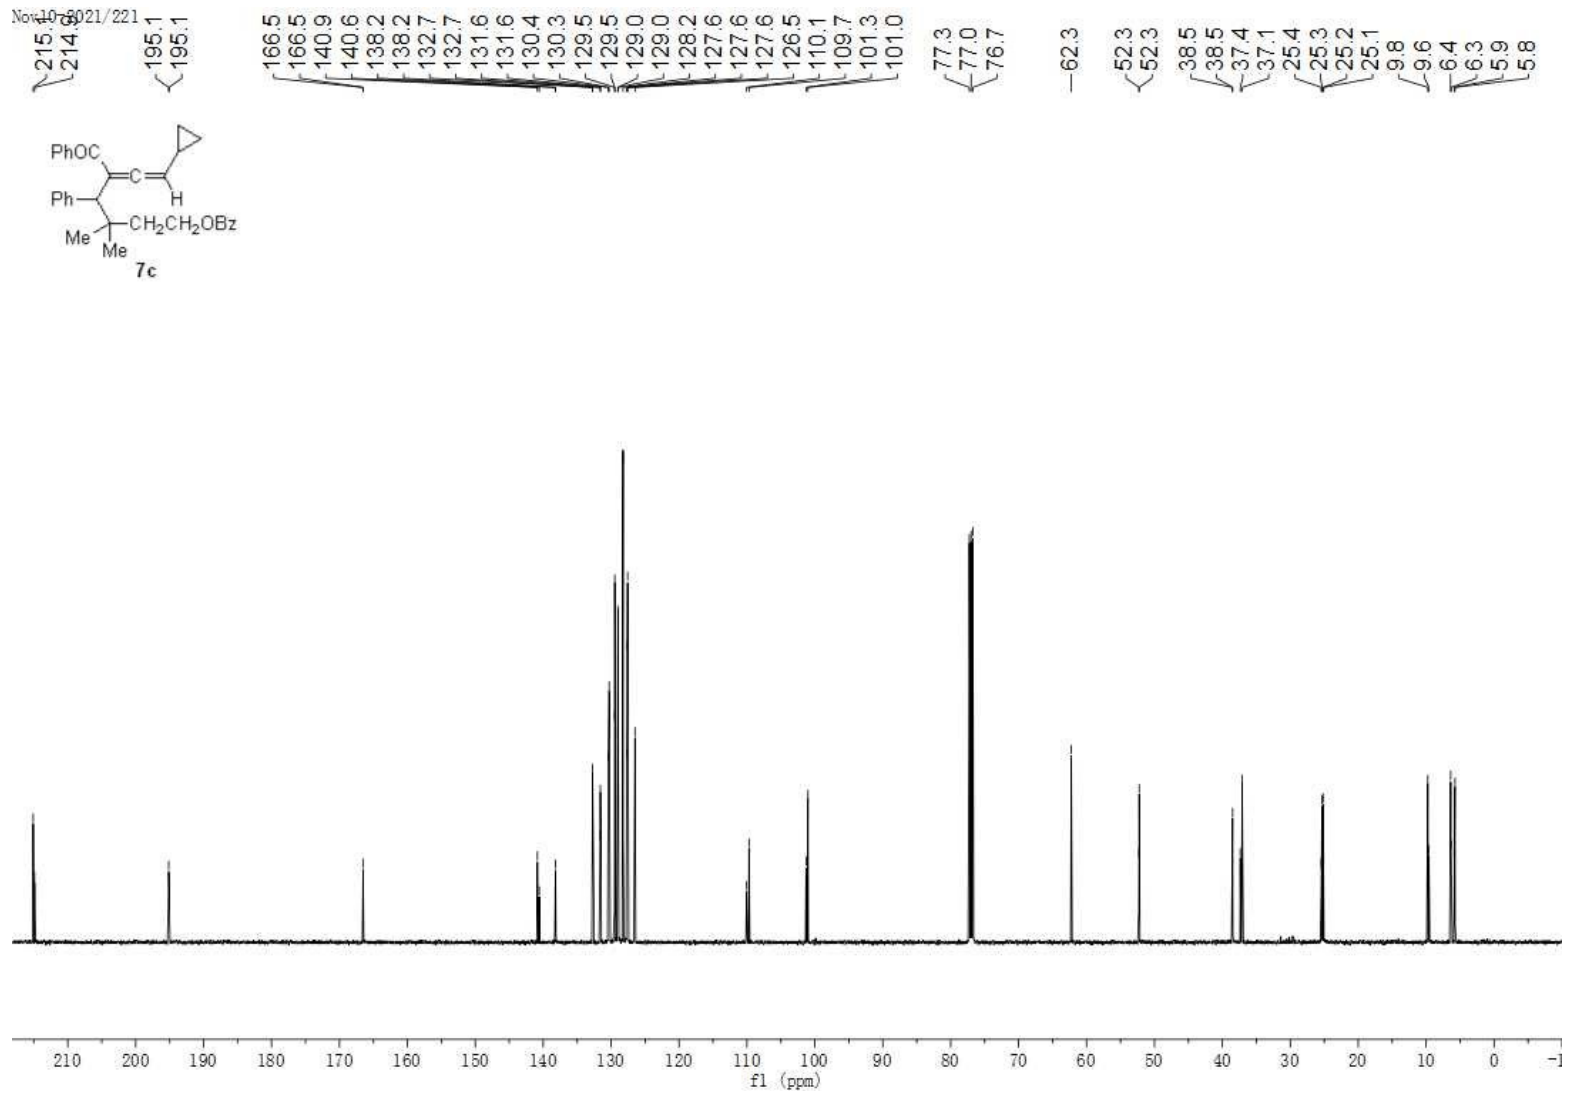

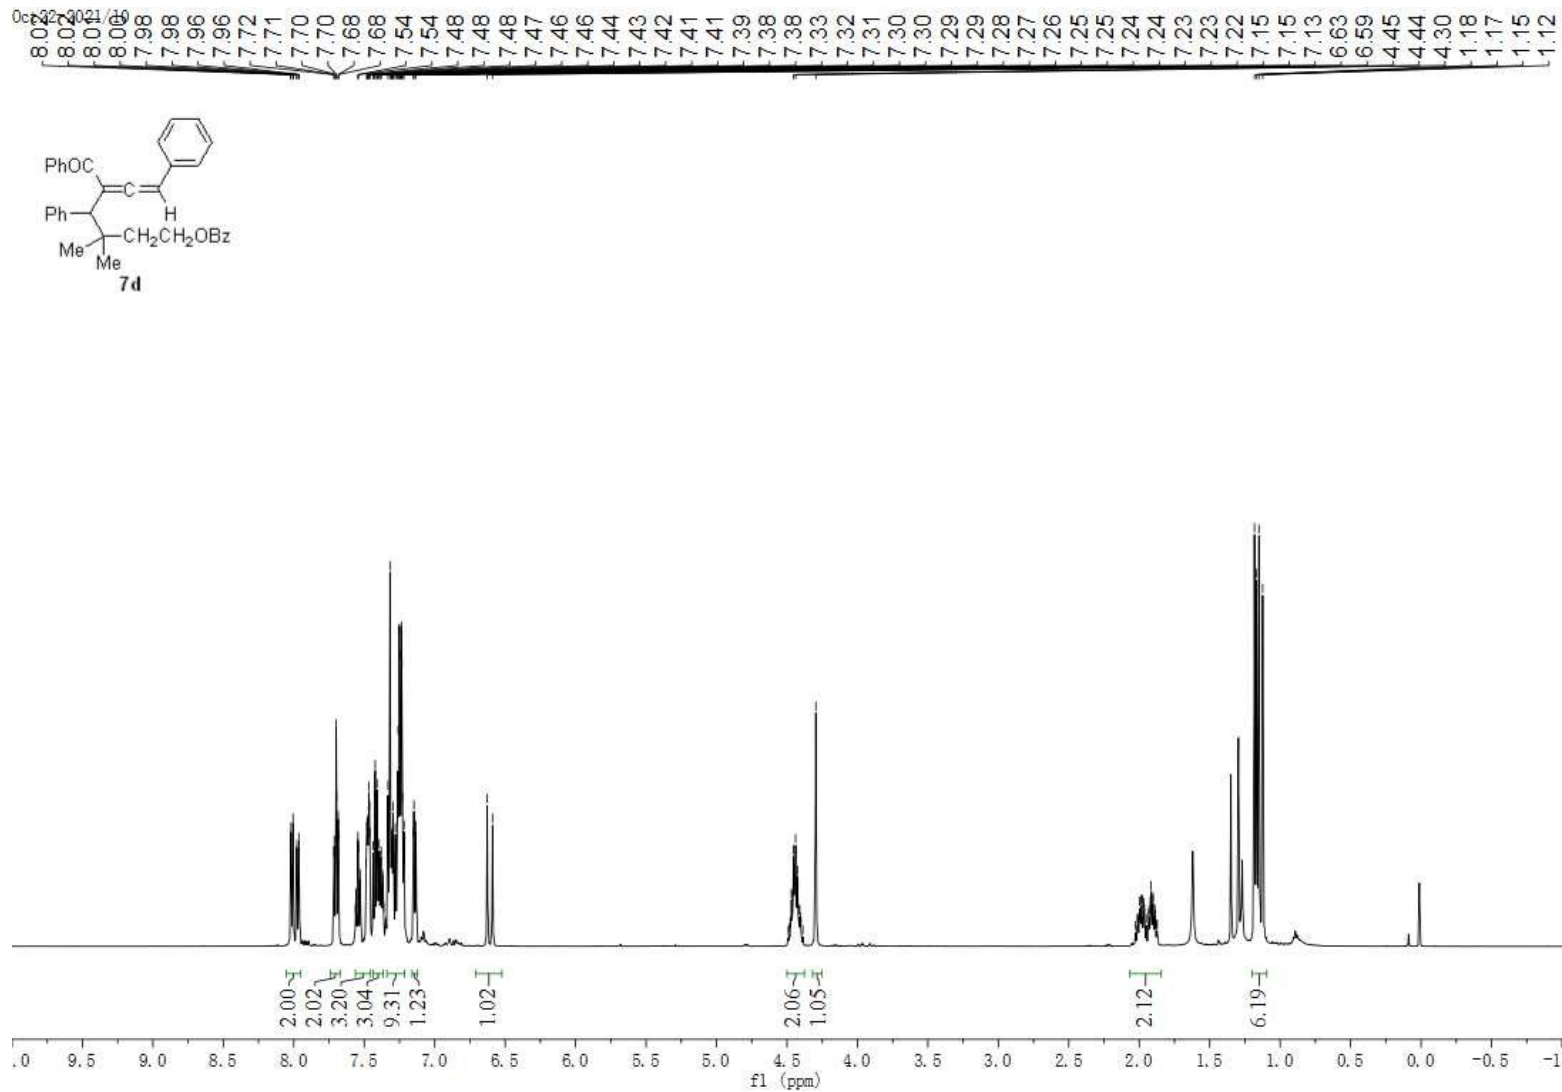

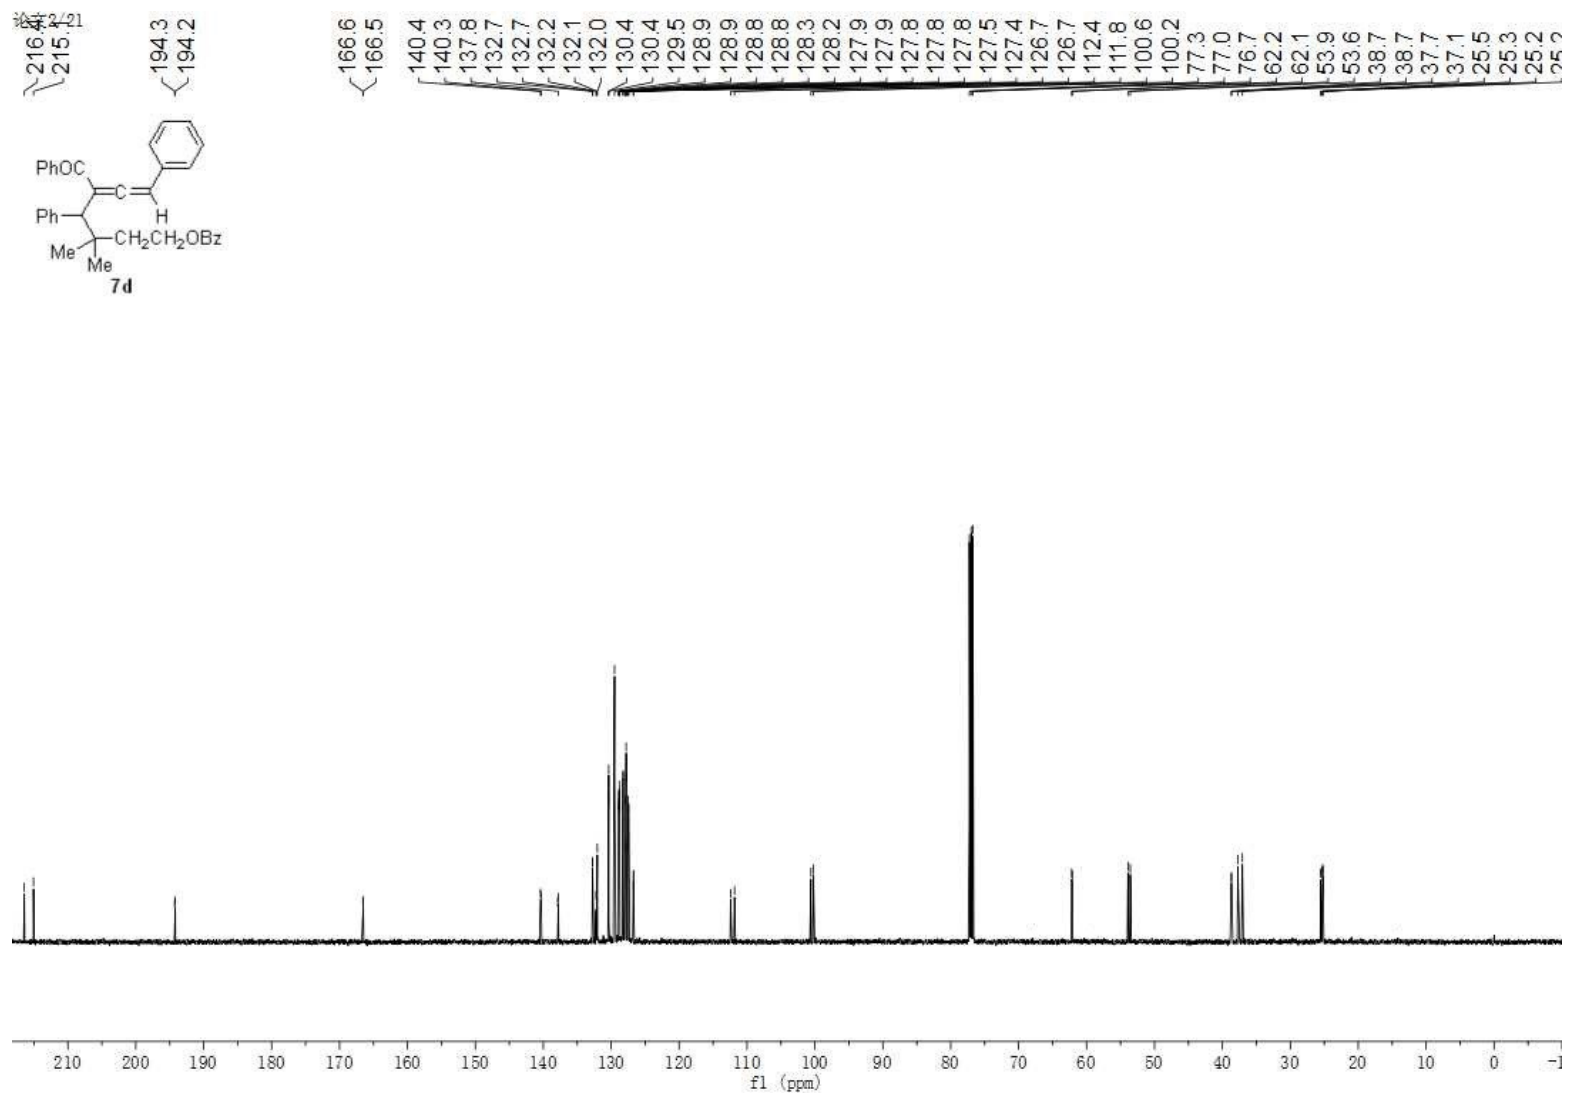

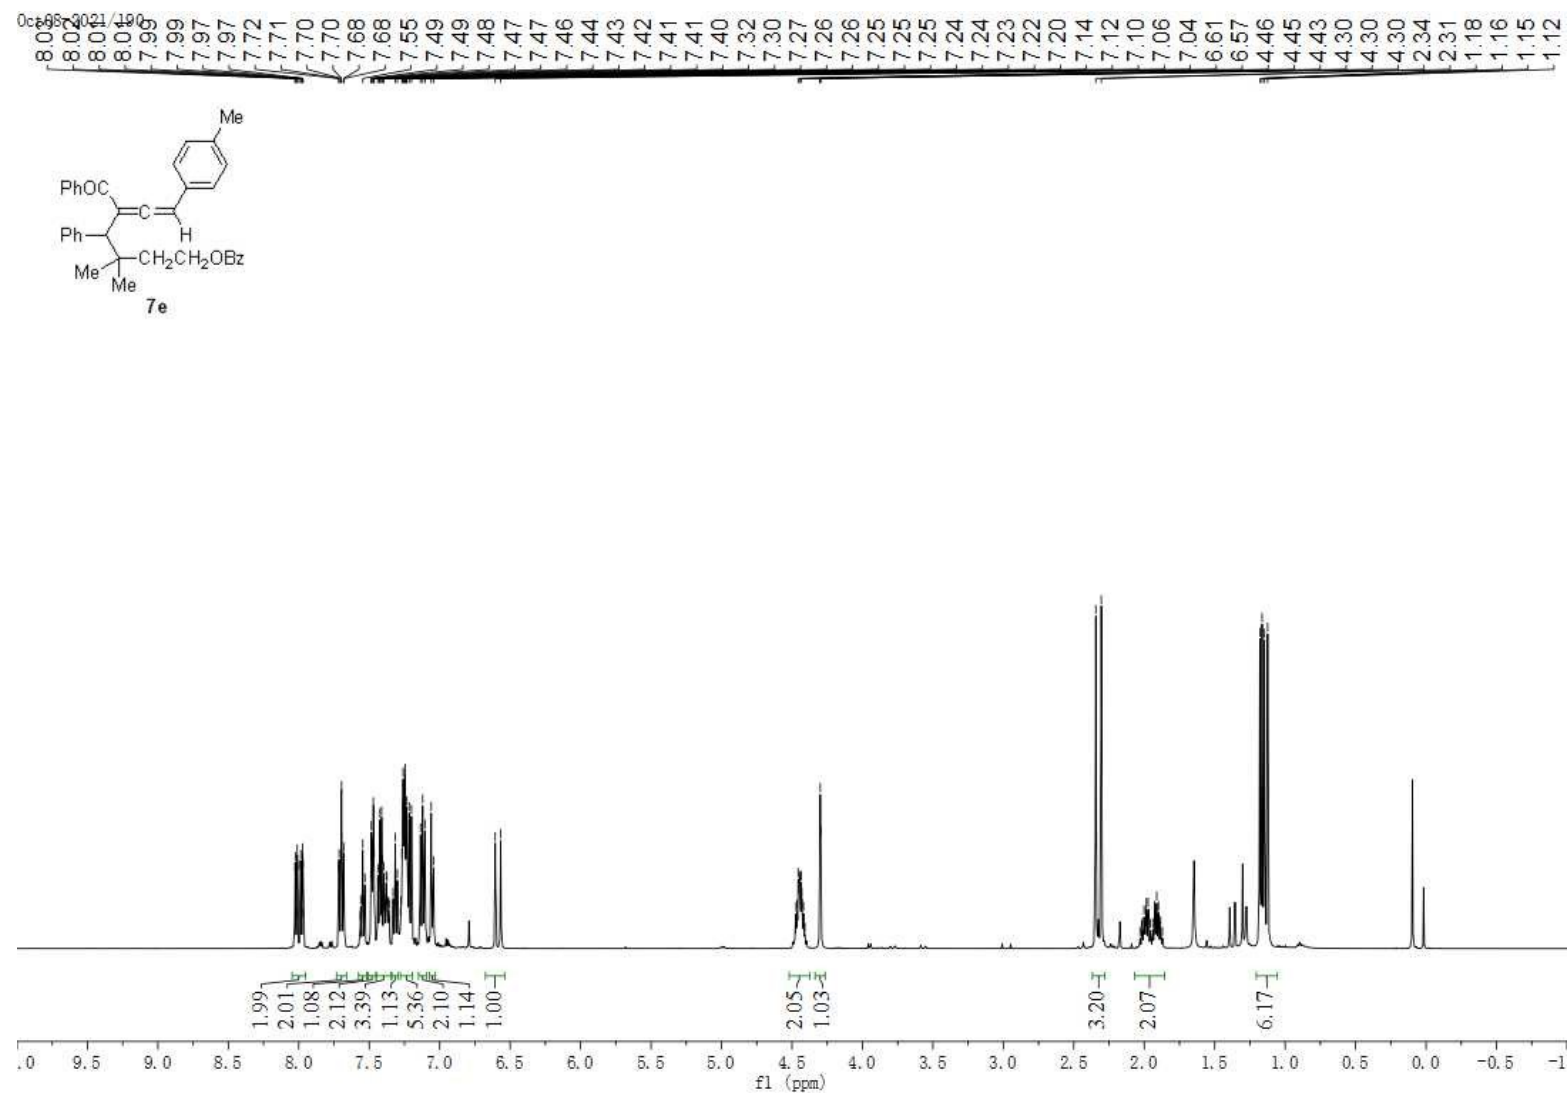

00408-2021/191

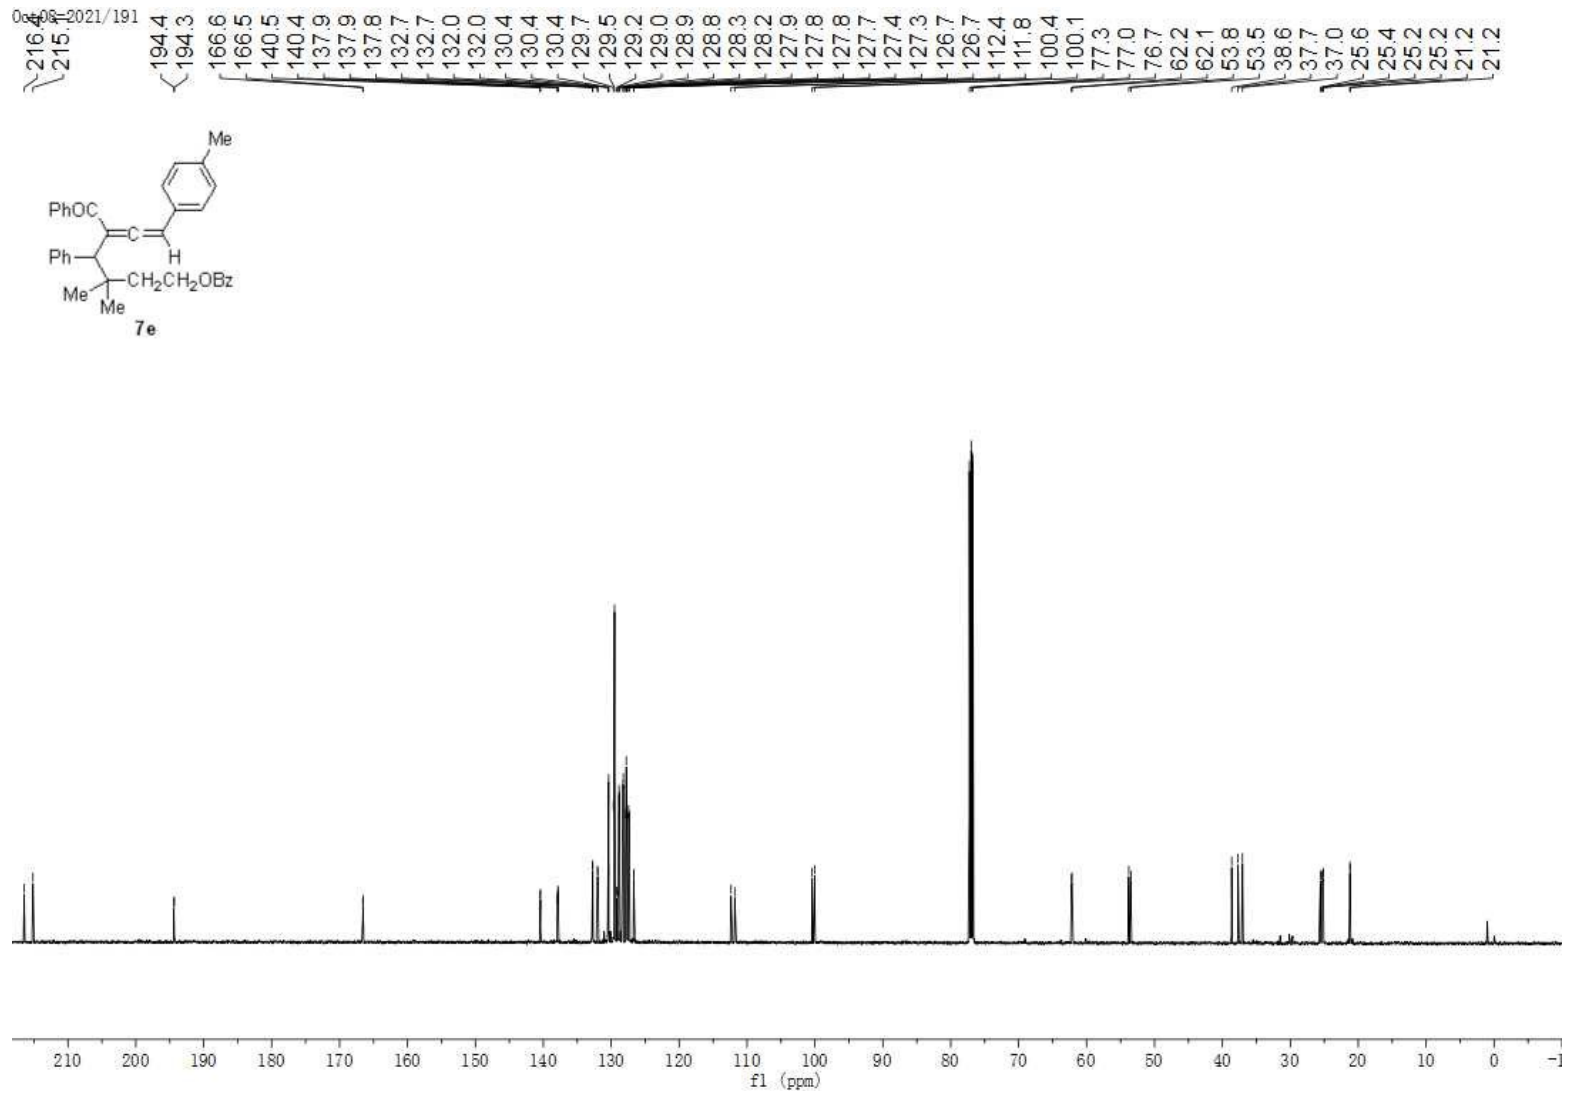

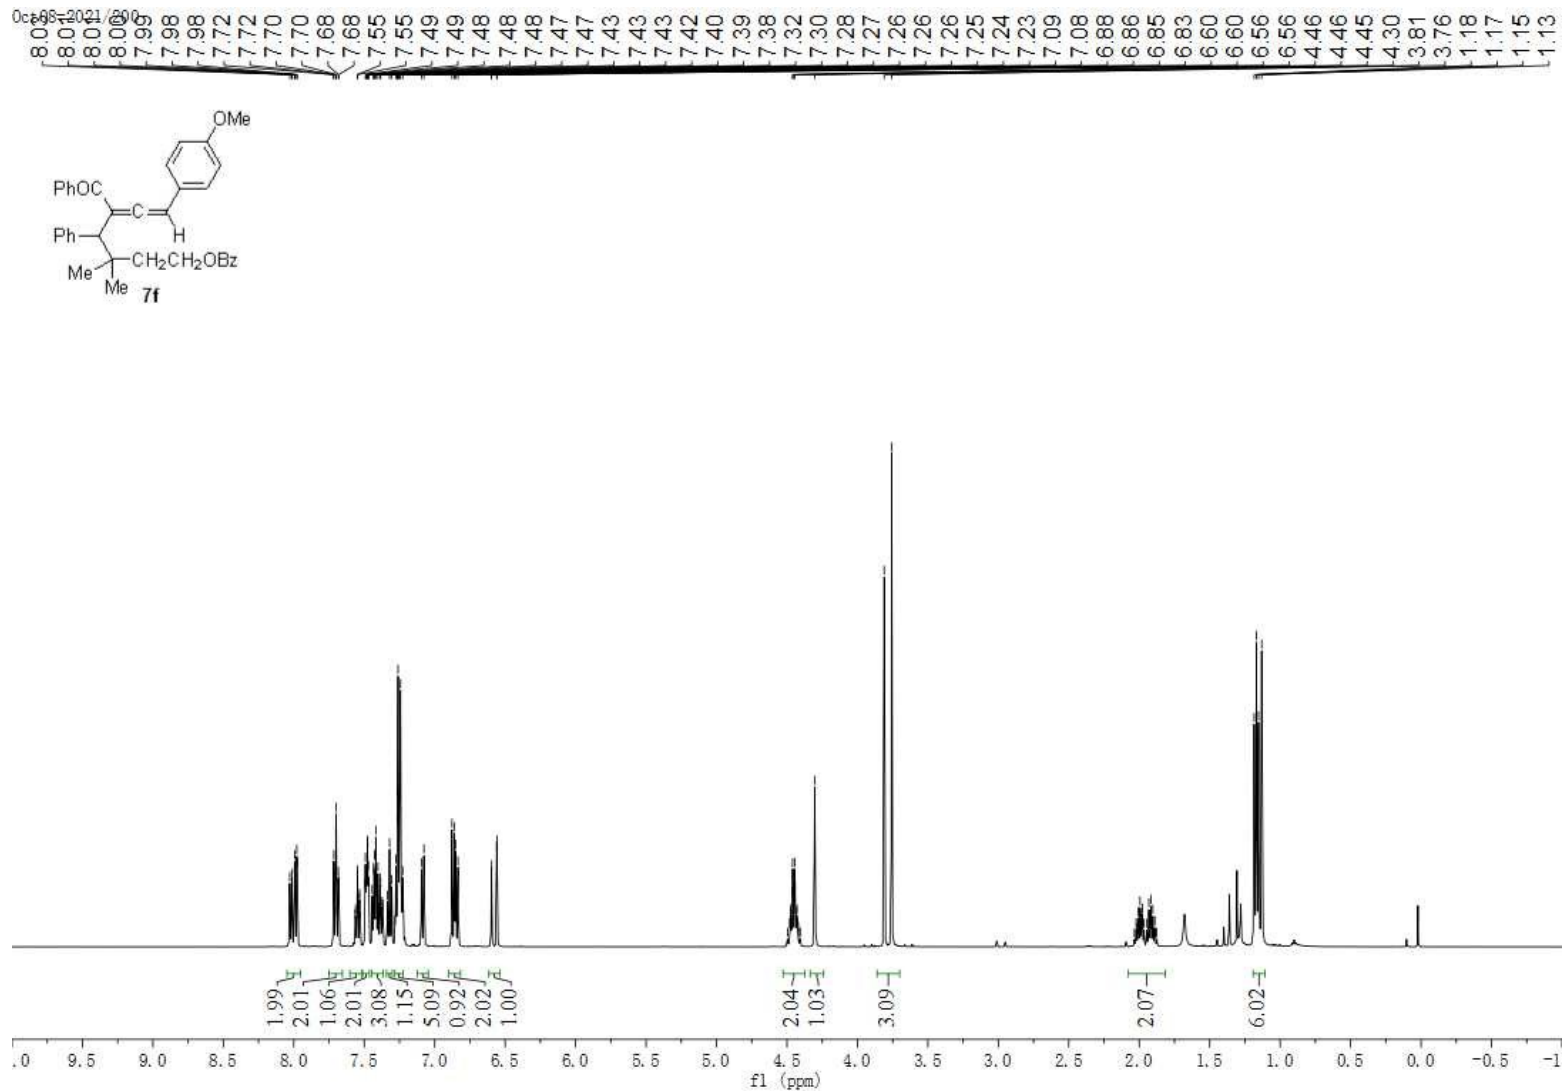

06-08-2021/201

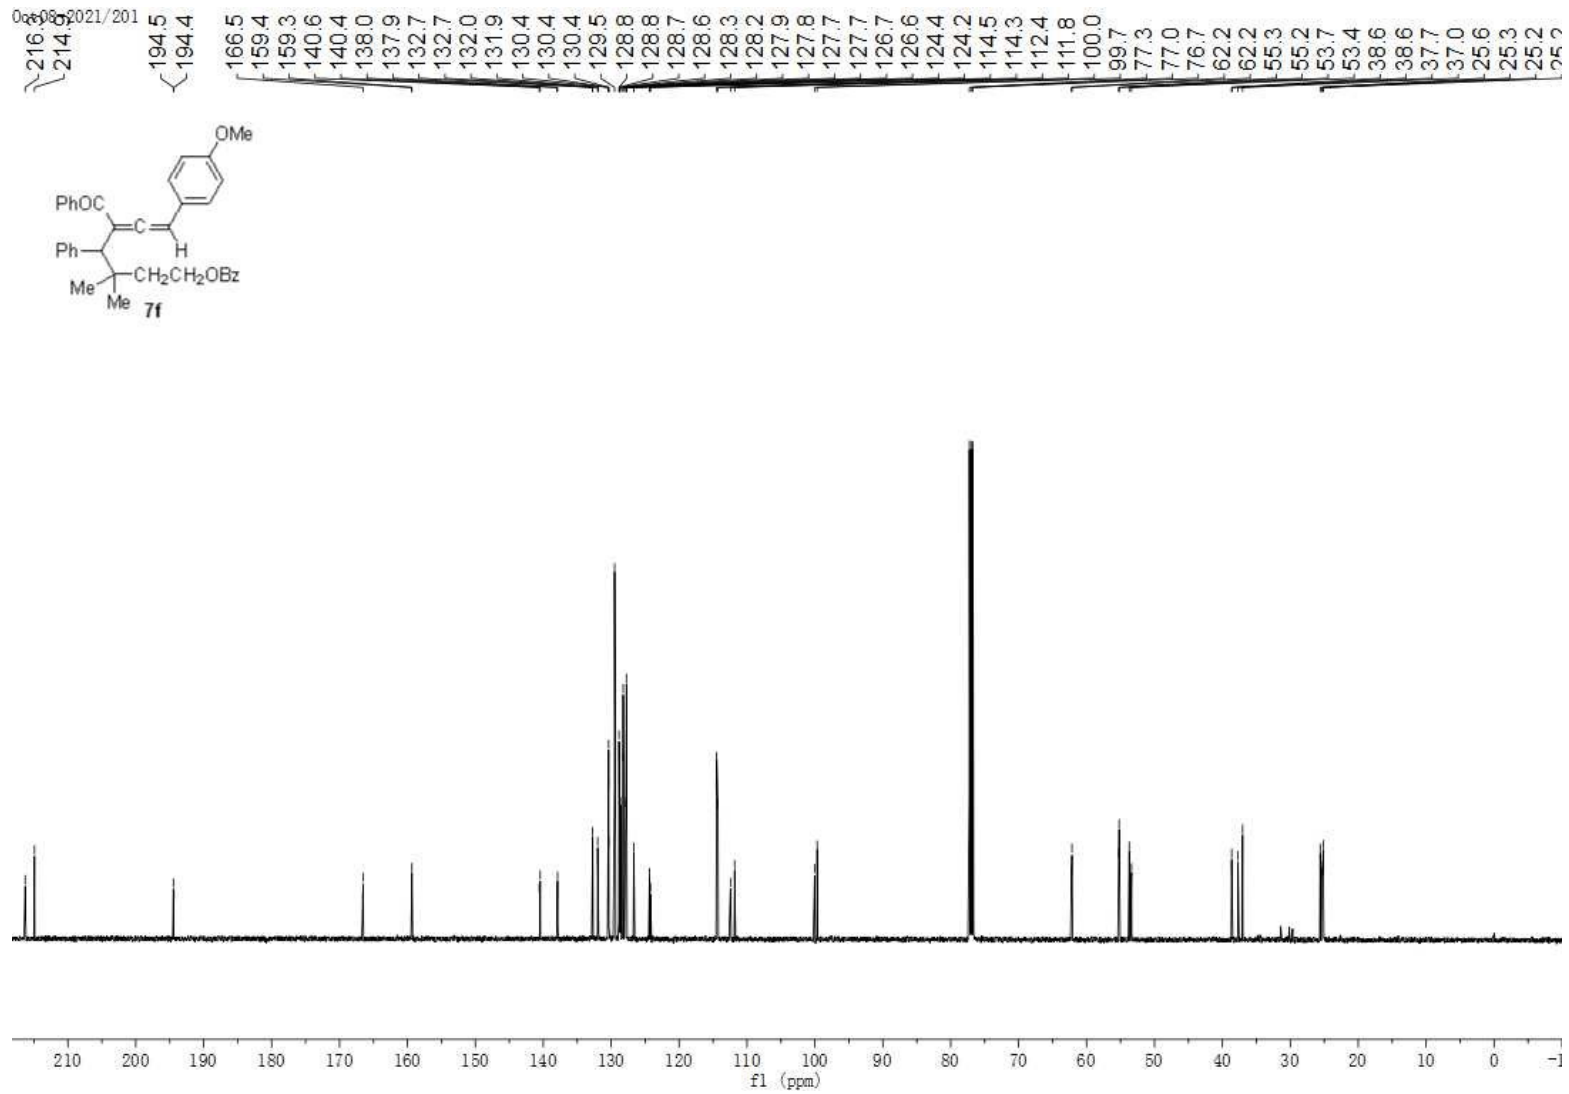

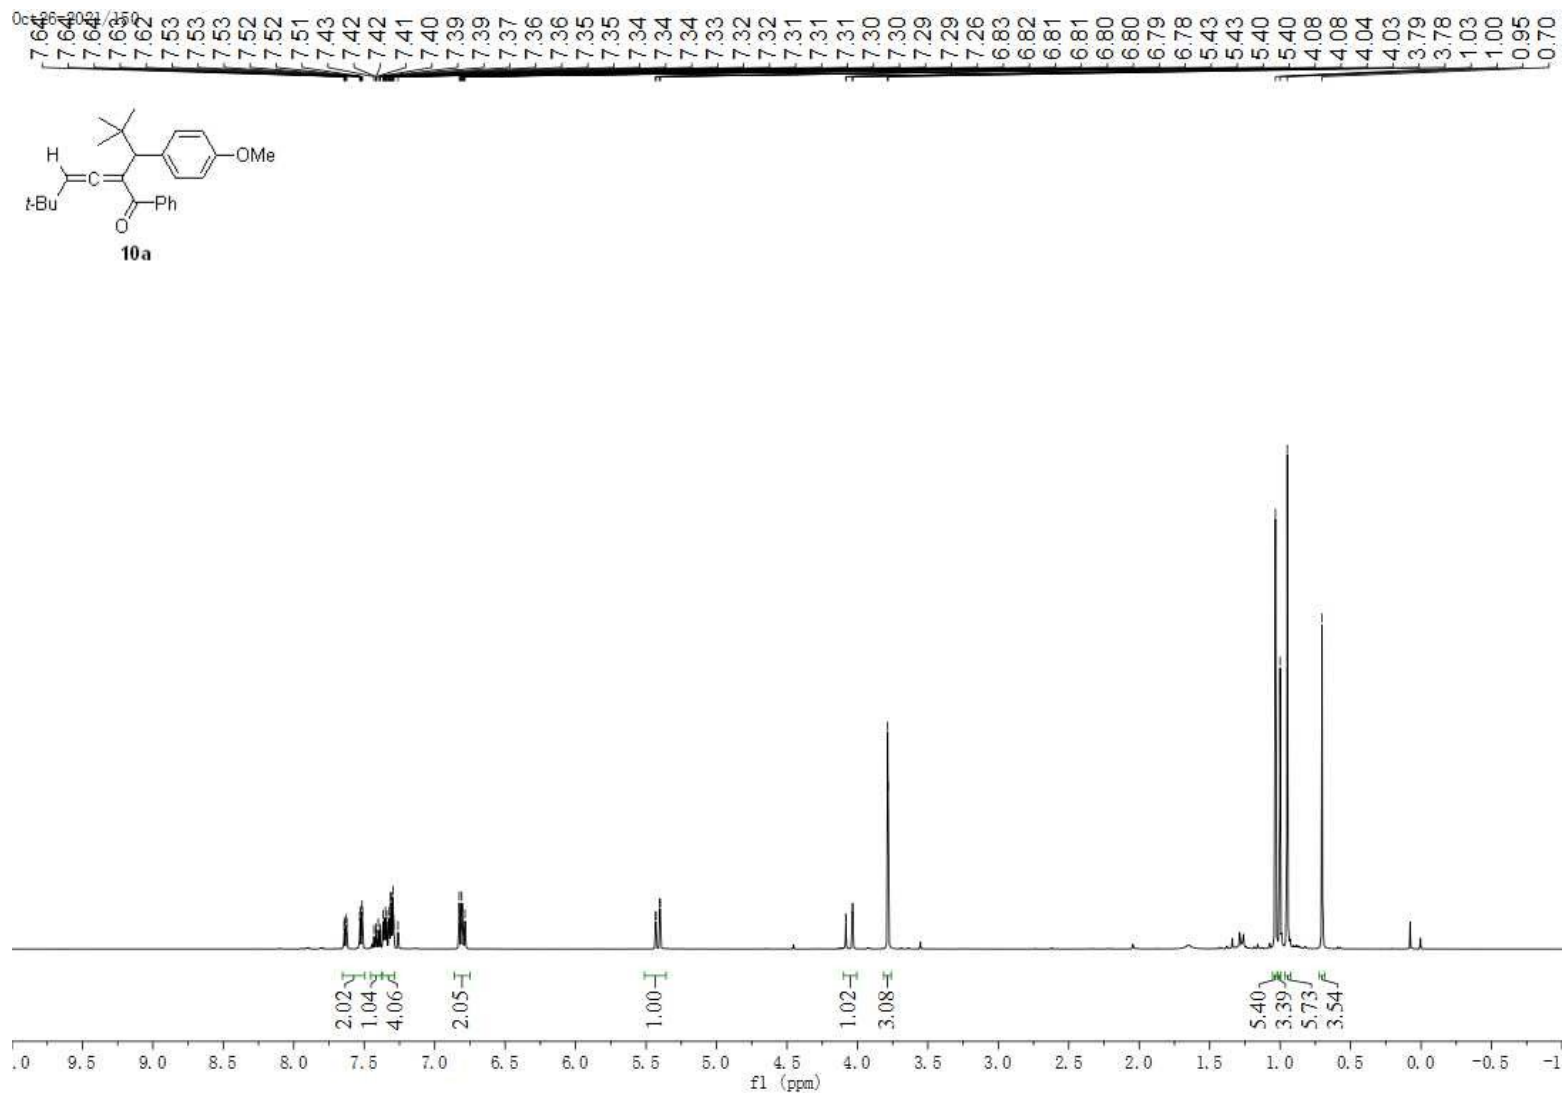



06-26-2021/170

213.4  
212.4  
196.5  
195.8

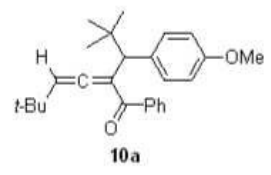

158.0  
158.0  
138.8  
138.7  
134.0  
133.9  
131.2  
131.1  
131.1  
130.9  
128.7  
128.5  
127.5  
127.4  
112.8  
112.7  
112.3  
112.2  
108.4  
108.1

77.3  
77.0  
76.7

55.1  
55.1  
51.8  
51.2  
36.1  
34.9  
33.6  
33.2  
29.5  
29.1  
28.4  
28.3

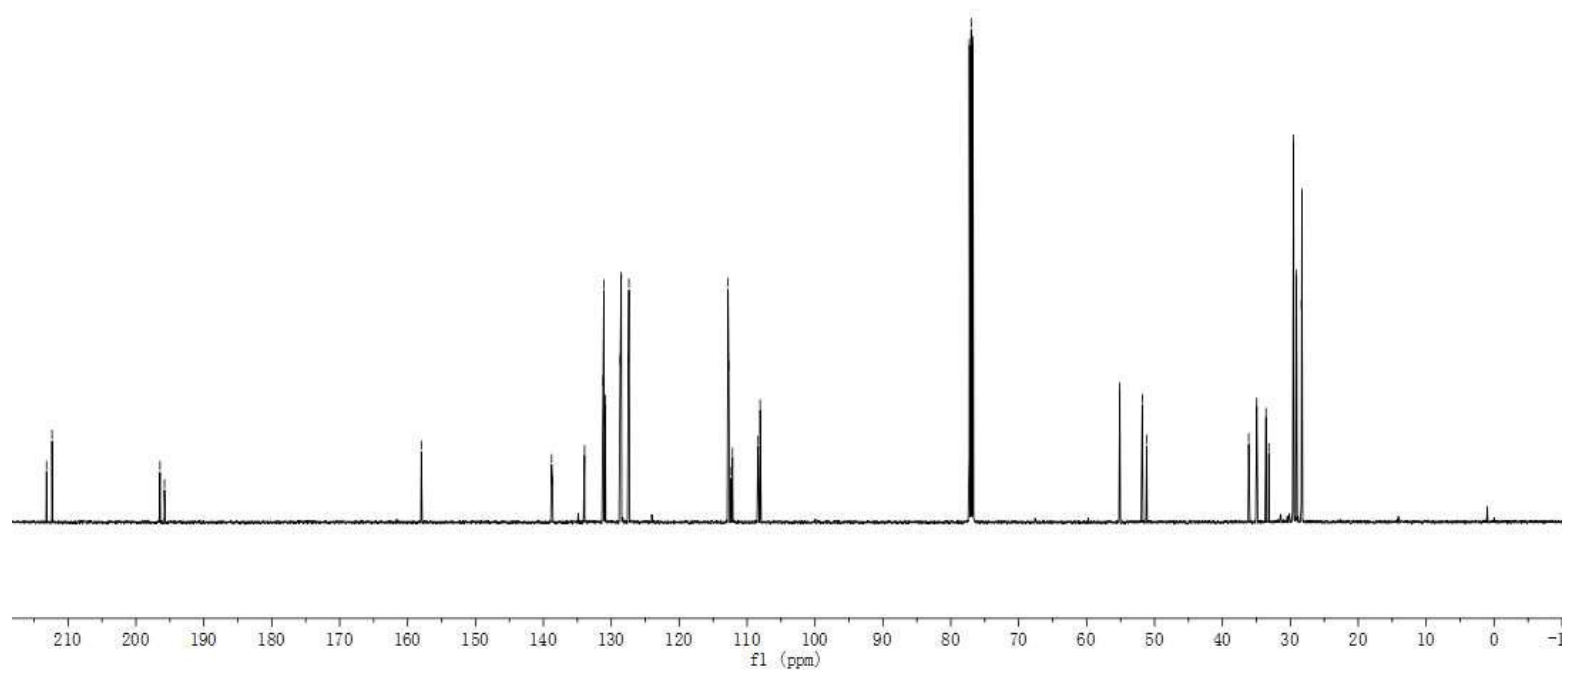

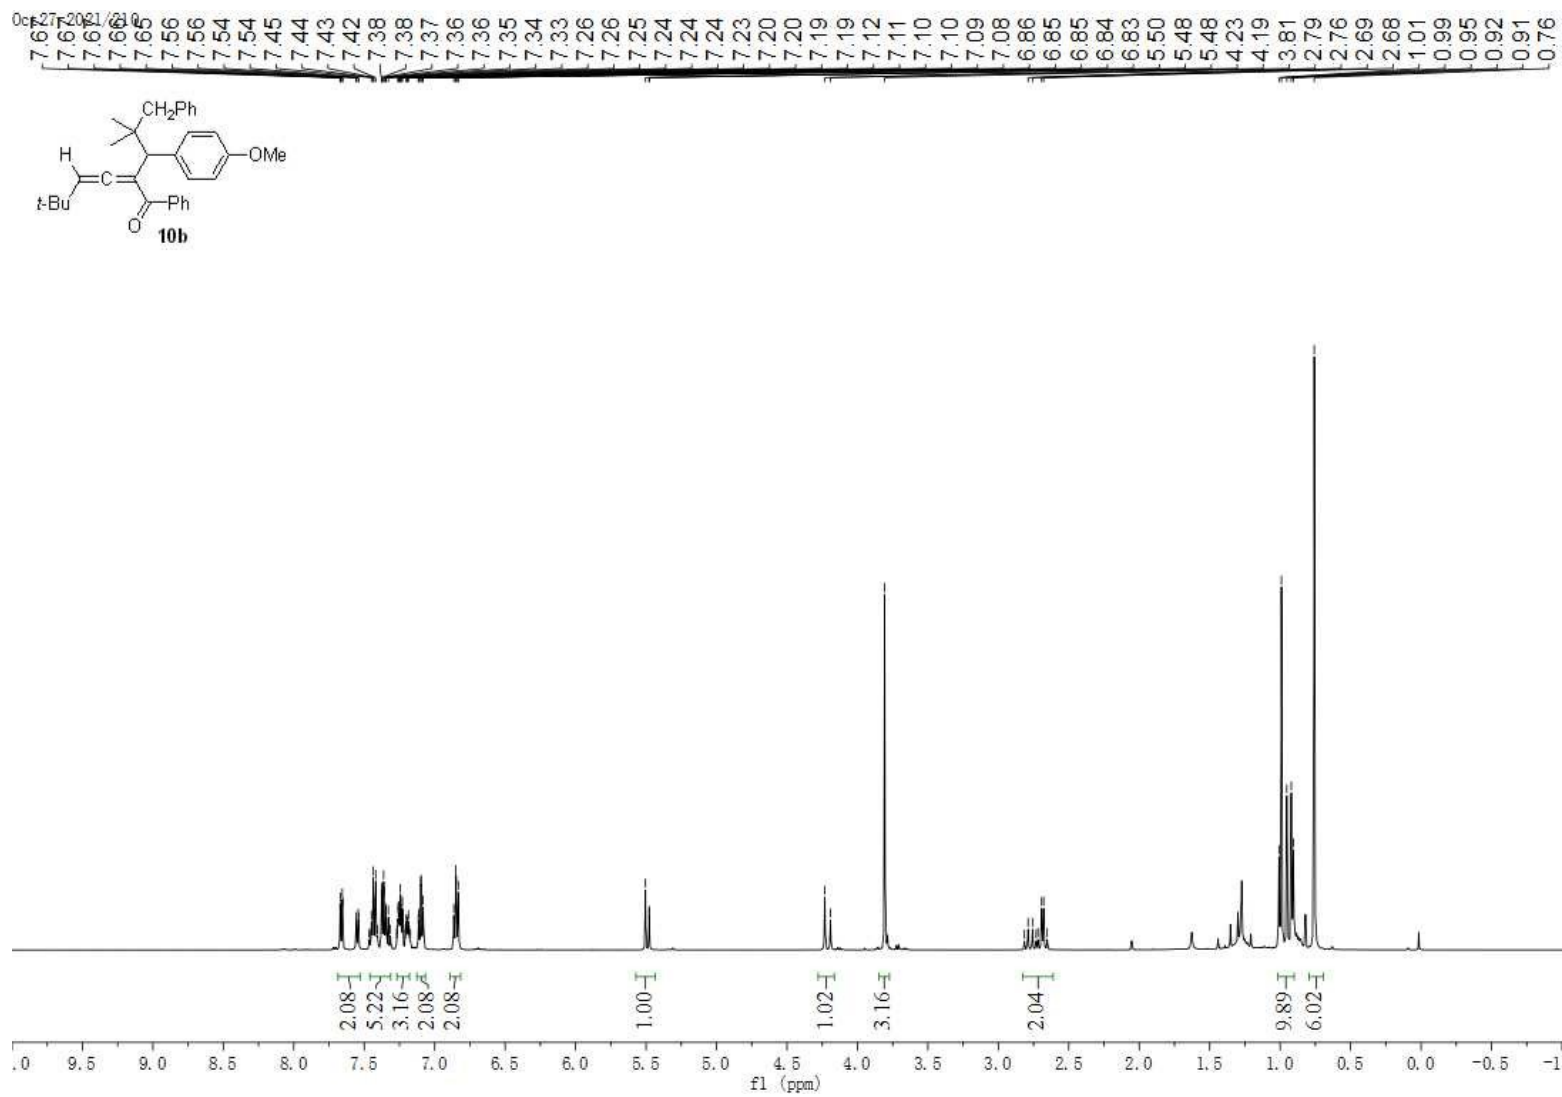

0852021/211

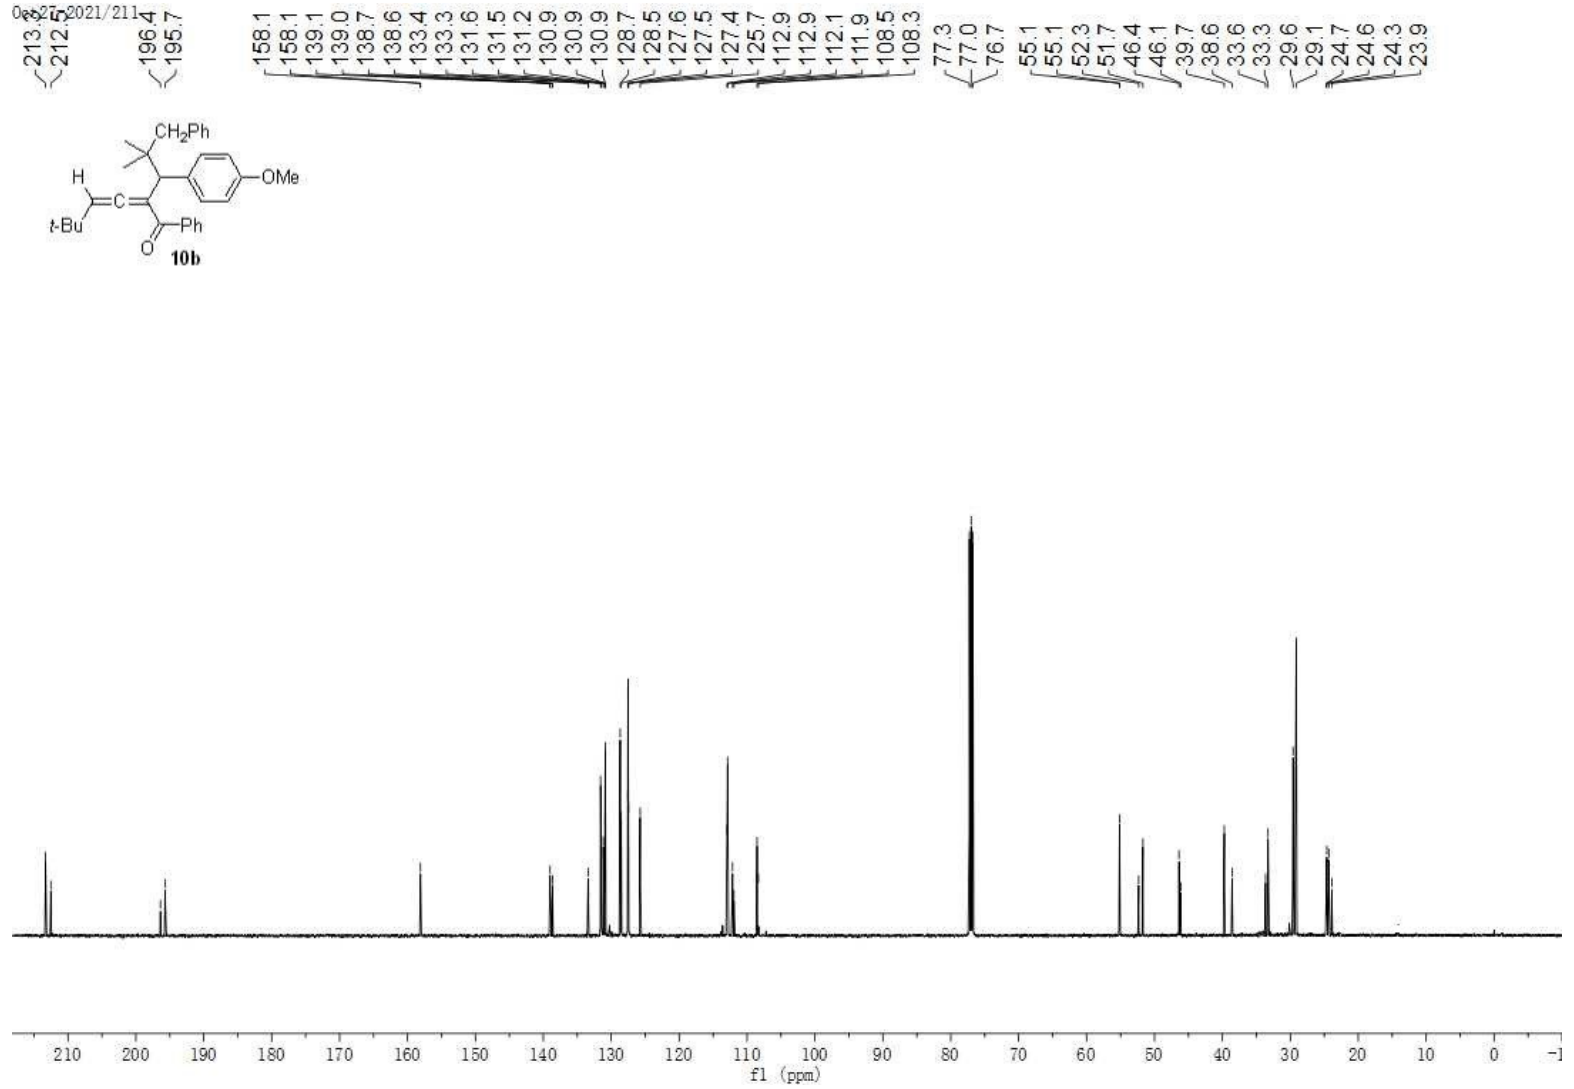

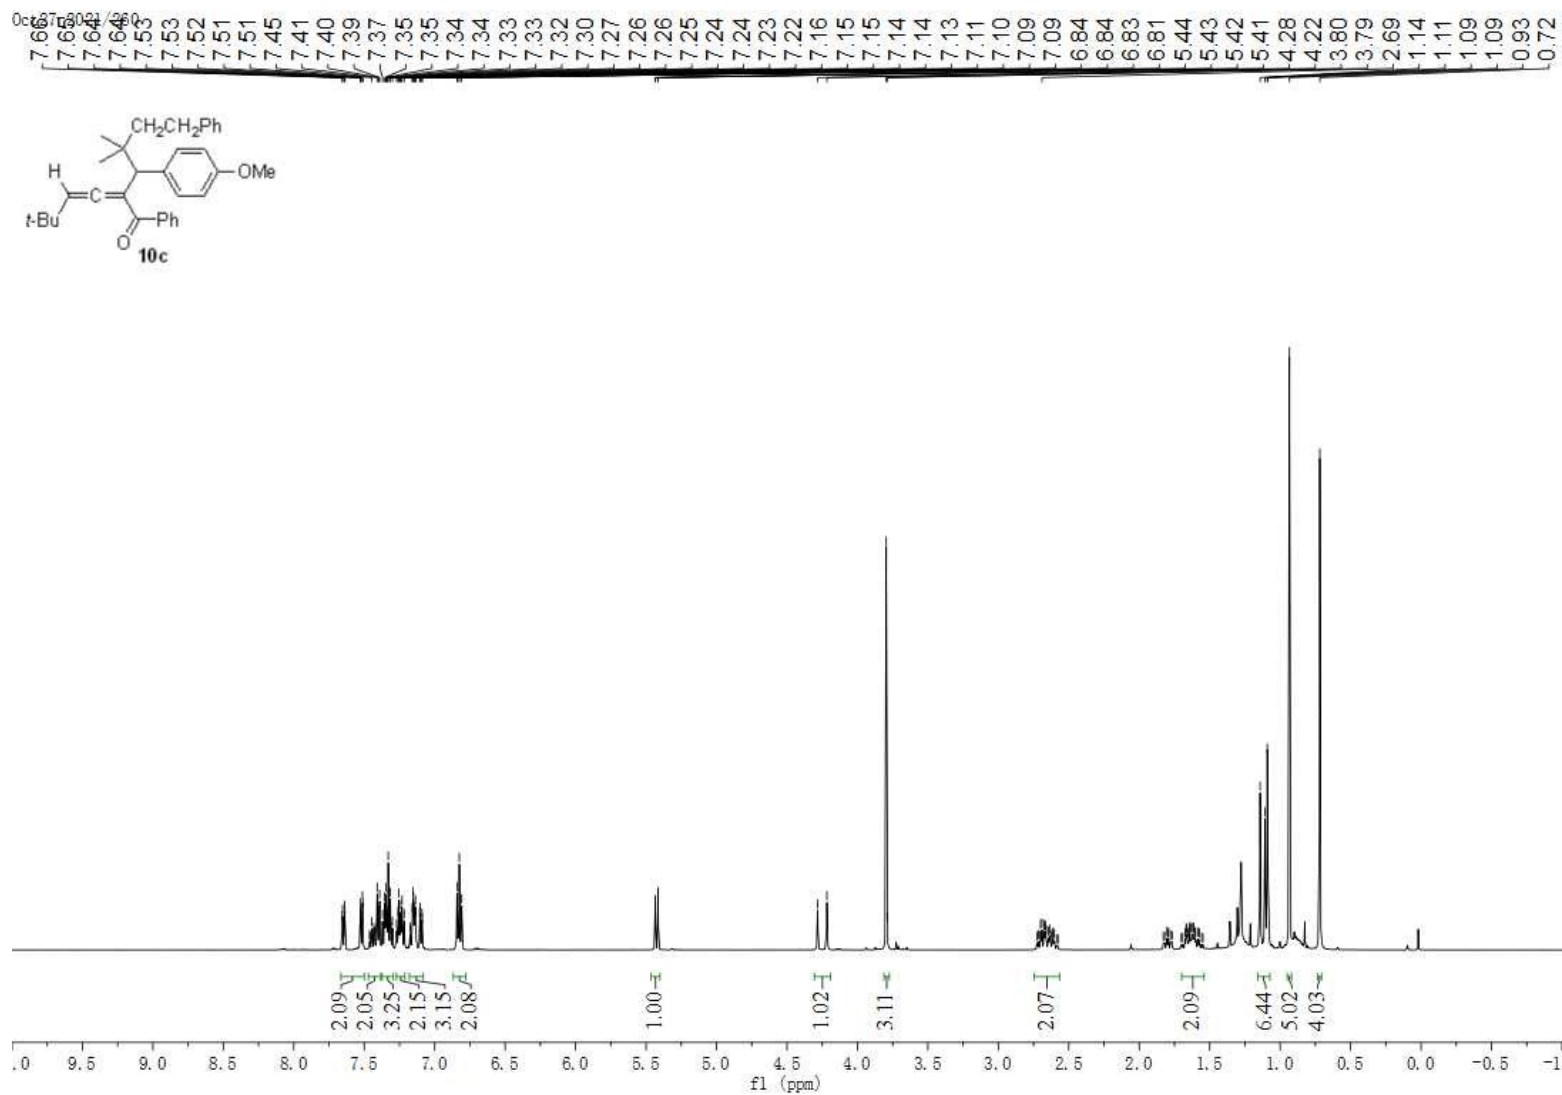

0652021/261

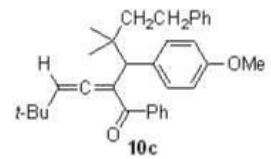

- 213.2
- 212.5
- 196.4
- 195.7
- 158.0
- 158.0
- 143.3
- 143.3
- 138.7
- 138.6
- 133.5
- 133.4
- 131.3
- 131.3
- 131.2
- 130.9
- 128.7
- 128.5
- 128.4
- 128.3
- 128.2
- 127.5
- 127.4
- 125.4
- 112.9
- 112.8
- 112.1
- 111.9
- 108.4
- 108.2
- 77.3
- 77.0
- 76.7
- 55.1
- 50.6
- 49.5
- 43.4
- 42.8
- 38.7
- 37.6
- 33.6
- 33.2
- 30.6
- 30.6
- 29.5
- 29.1
- 25.6
- 25.4
- 25.1
- 24.9

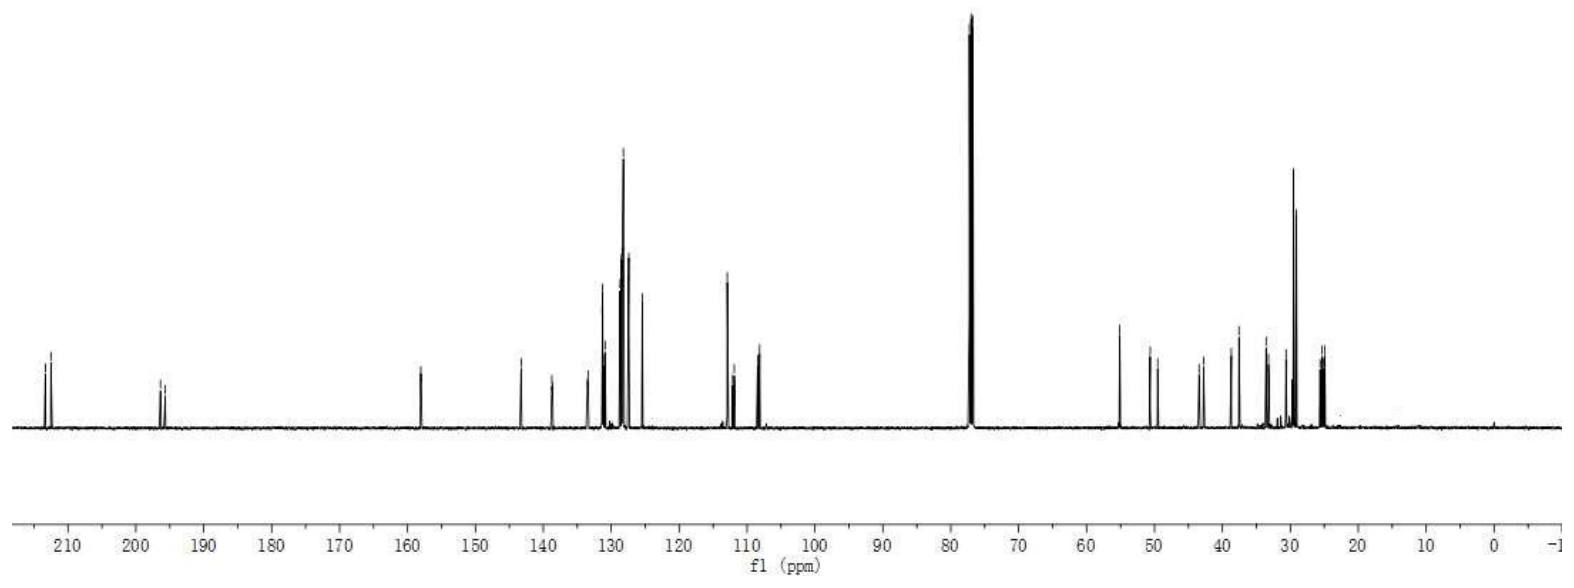

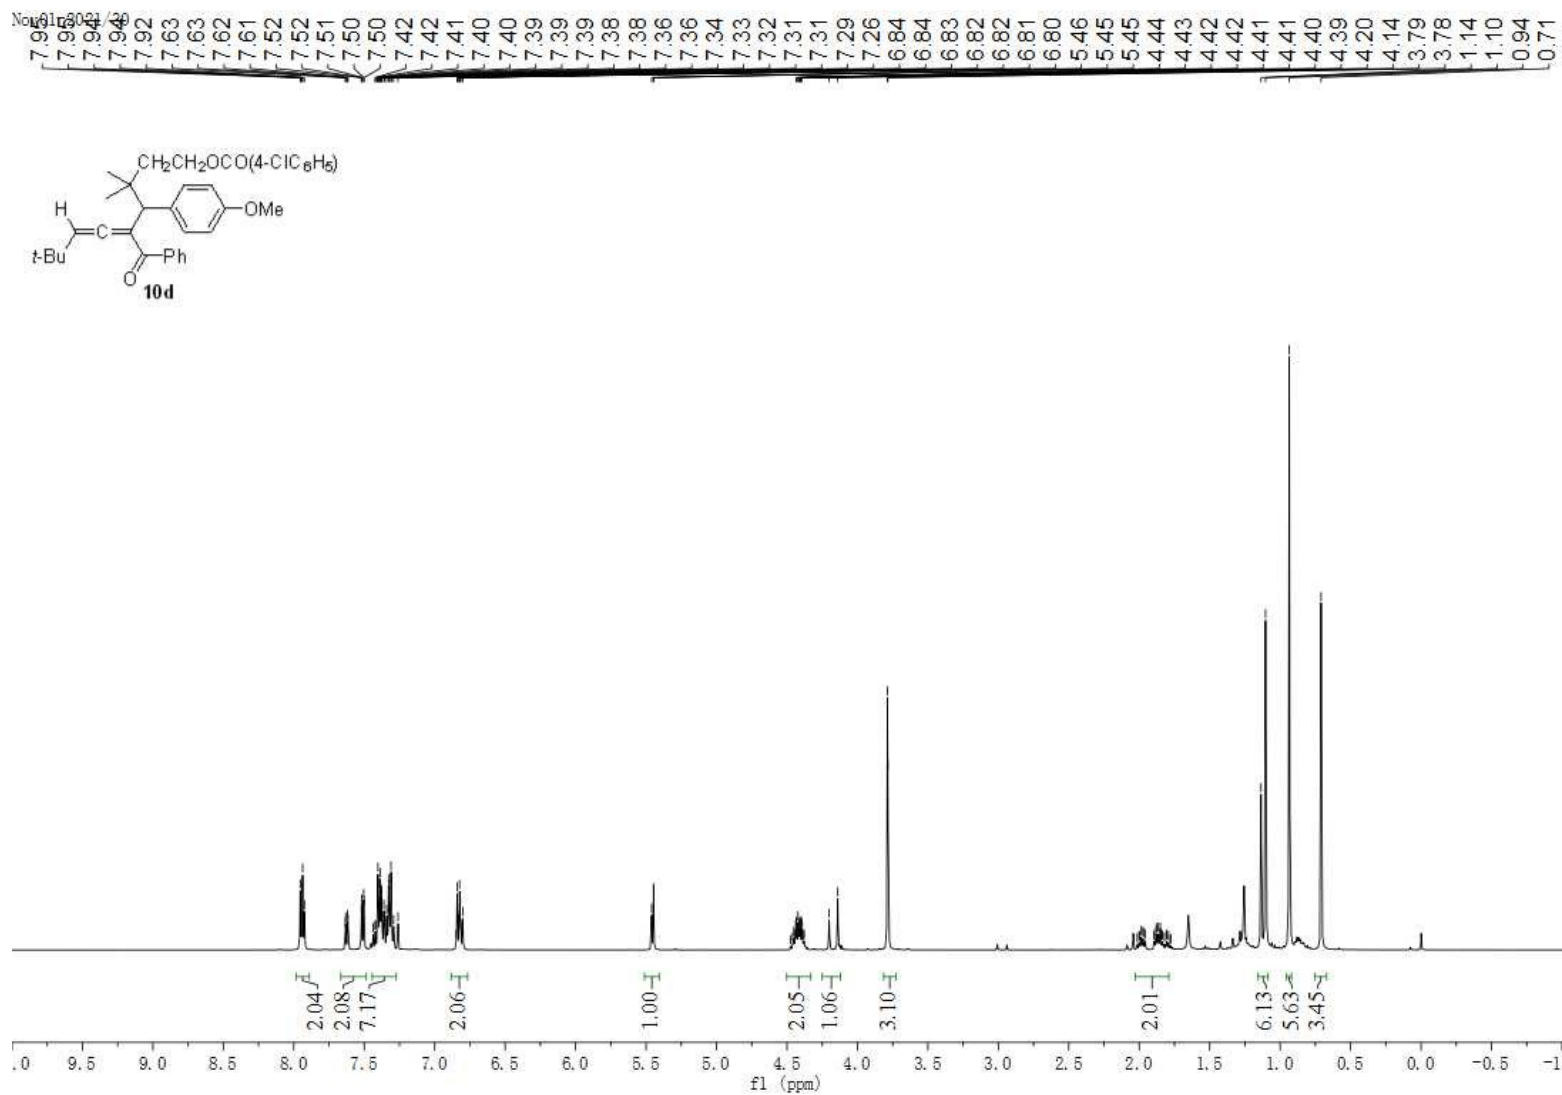

№ 2021/31

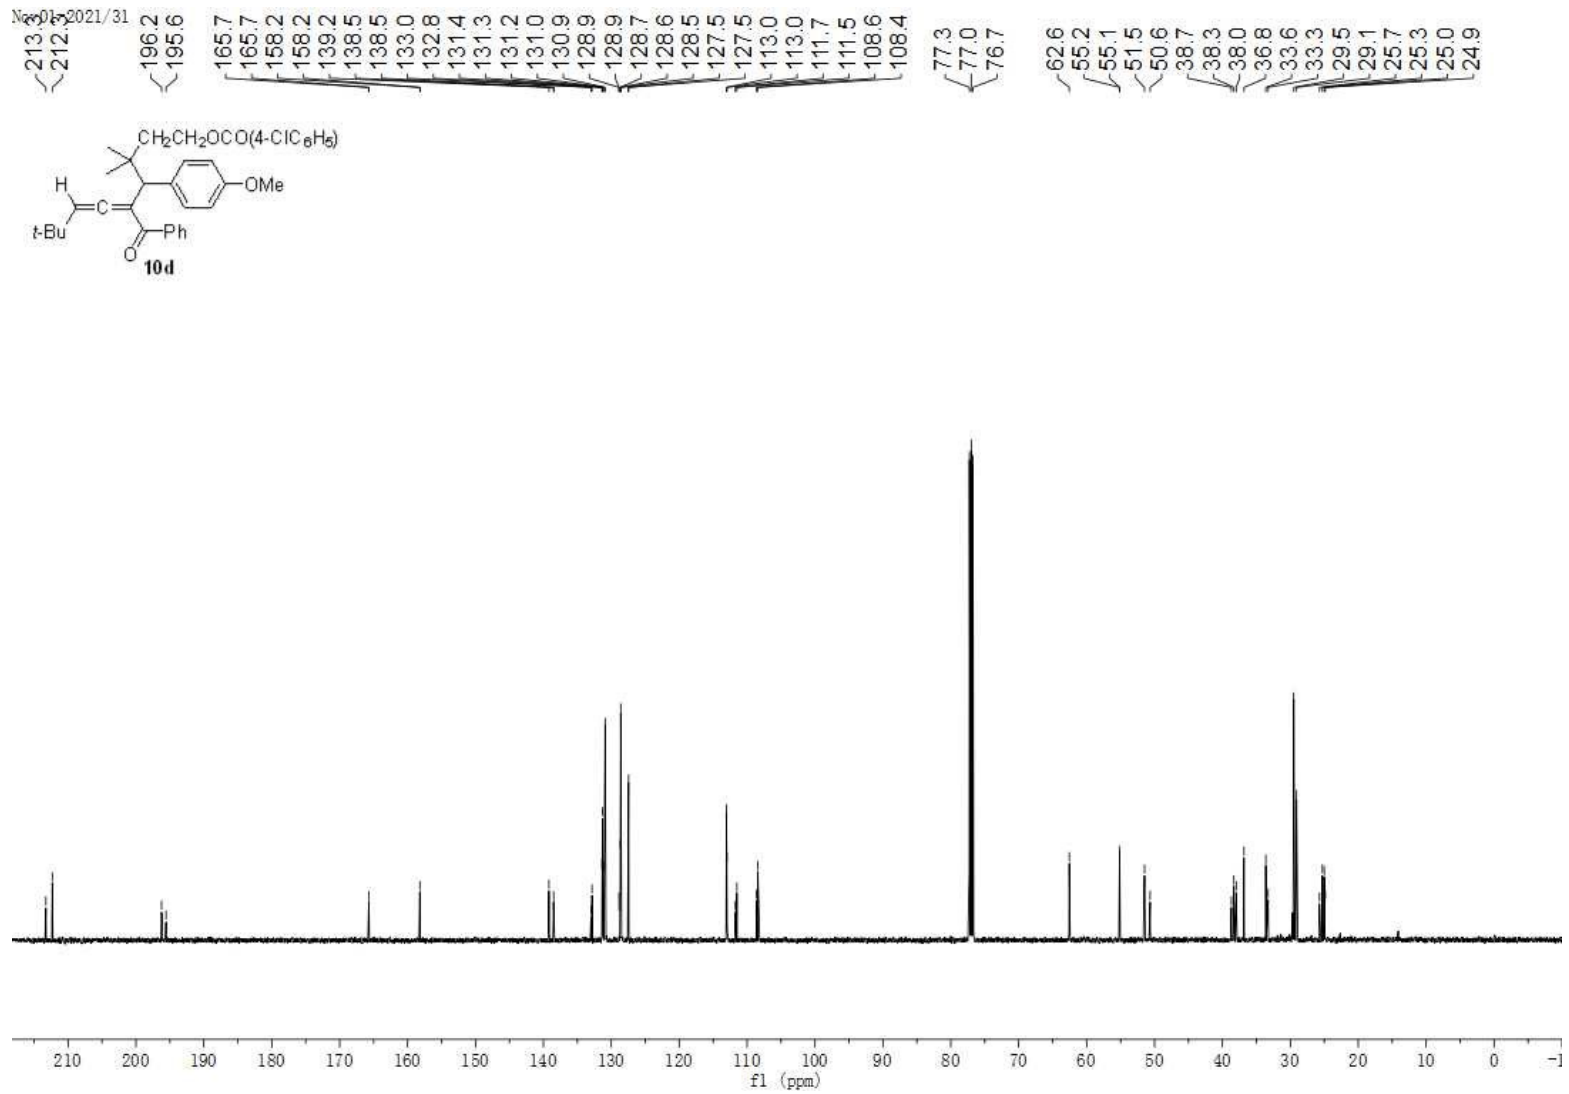

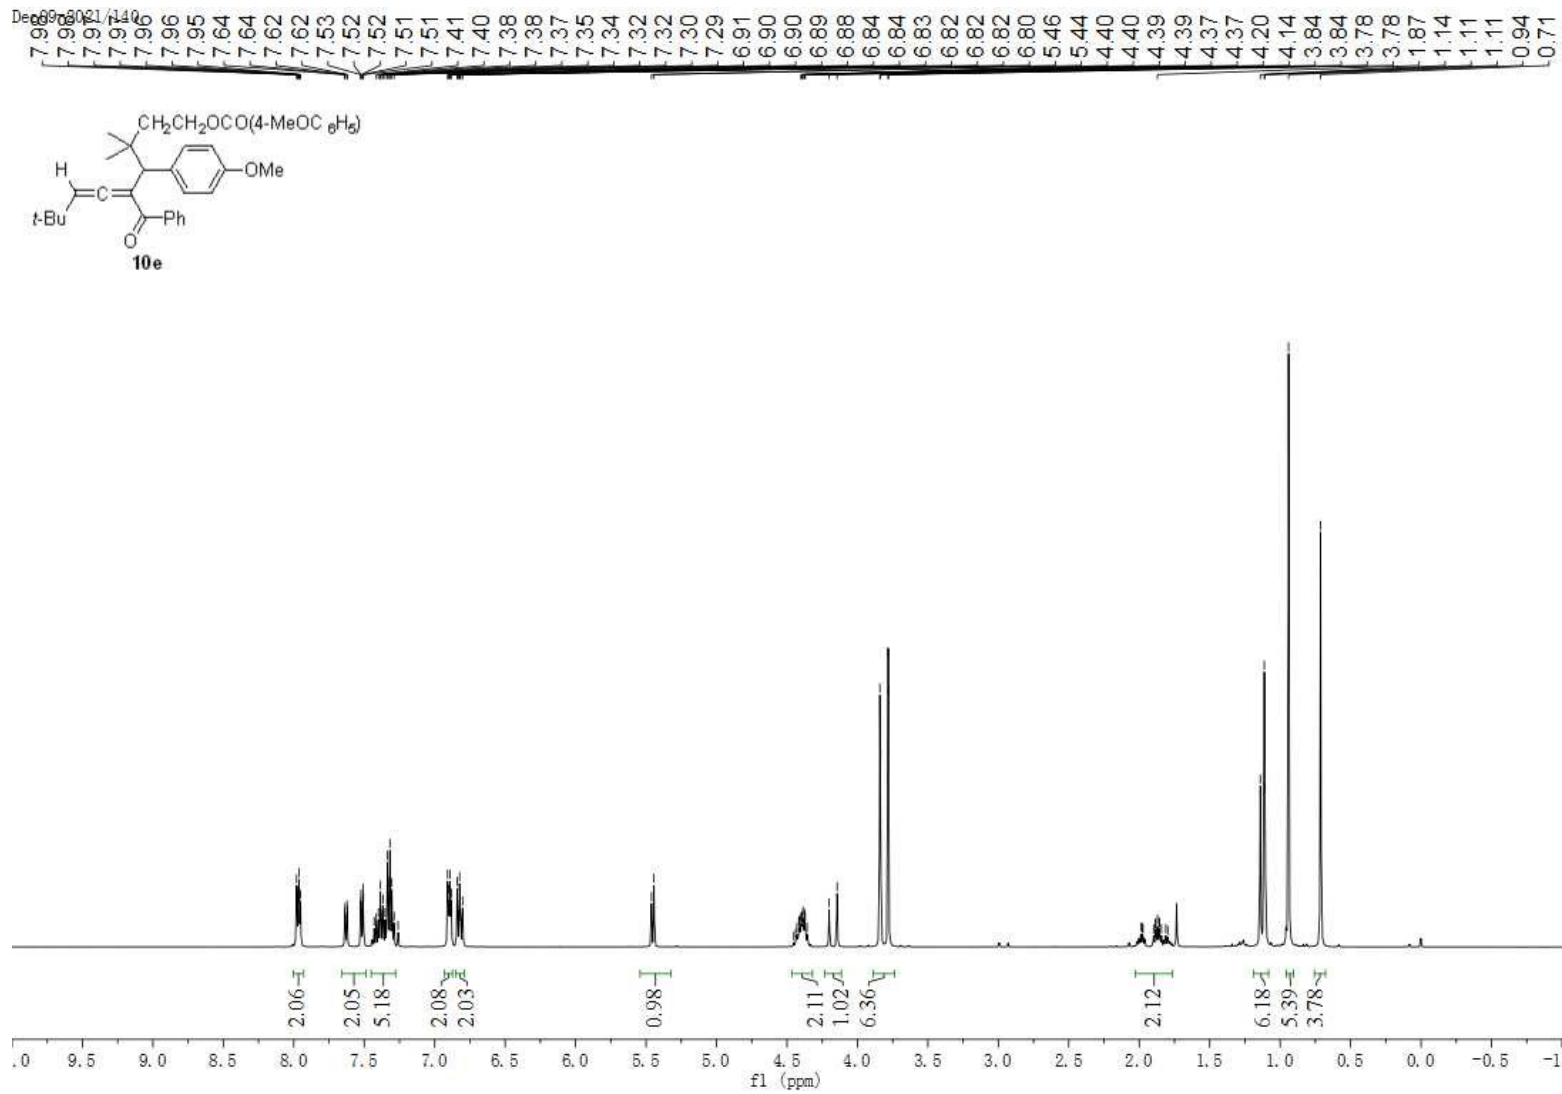



Dec 09 2021/141

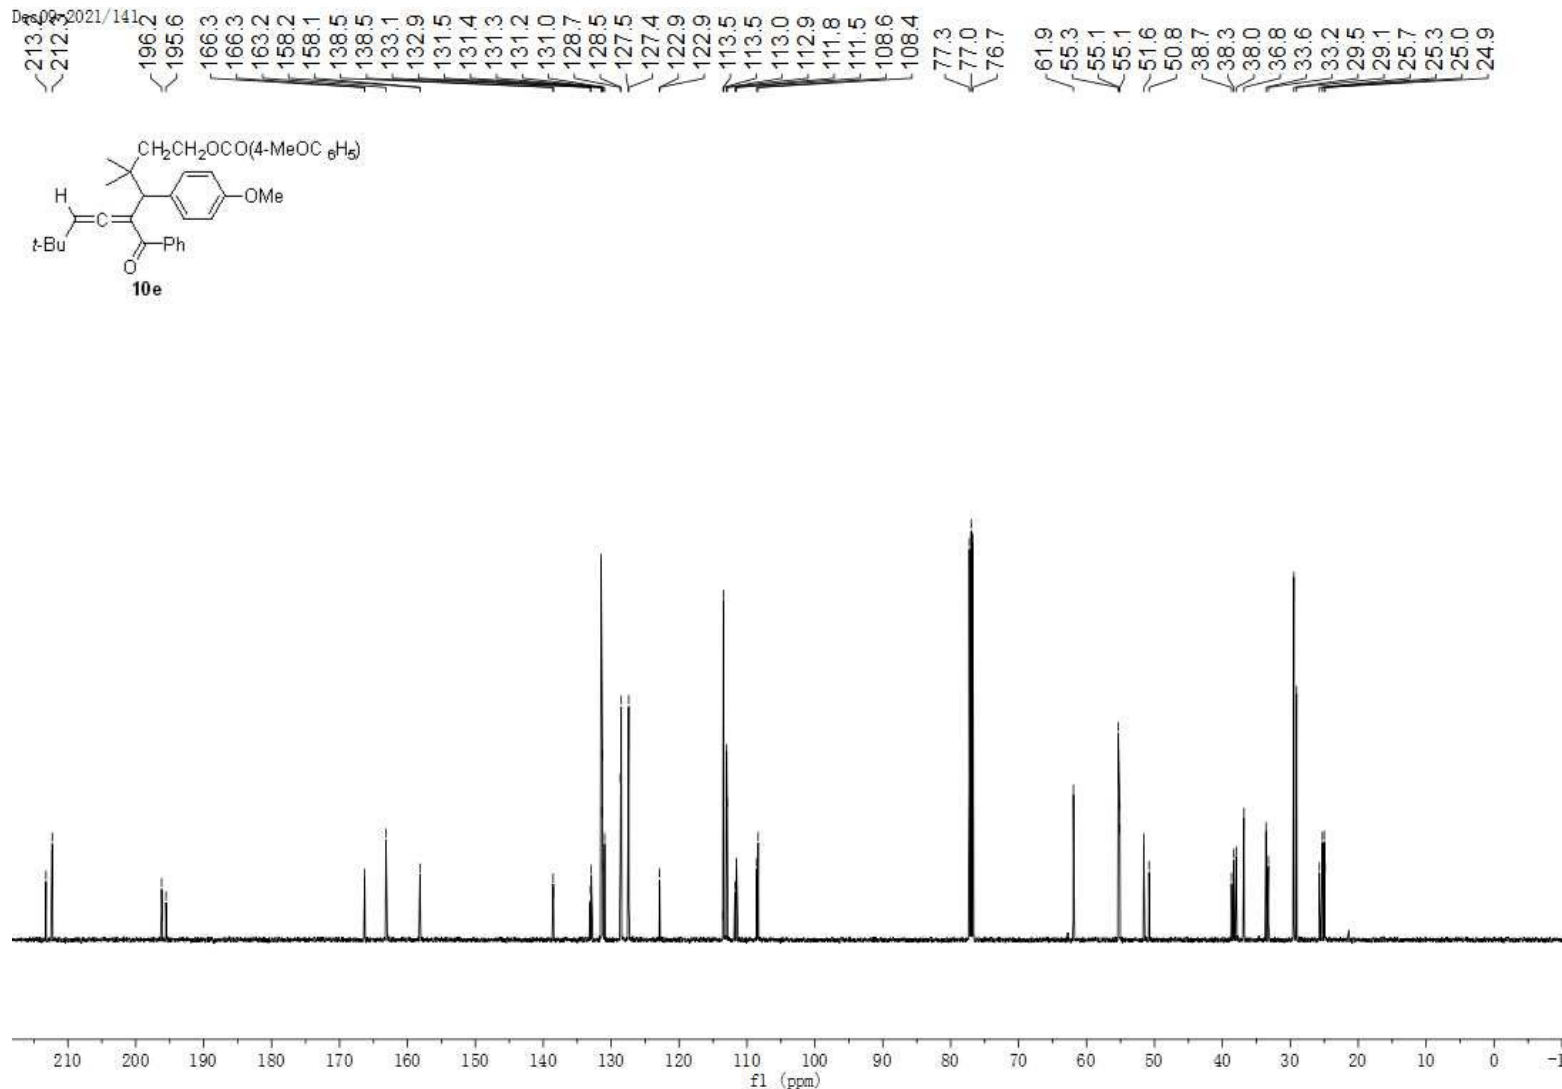

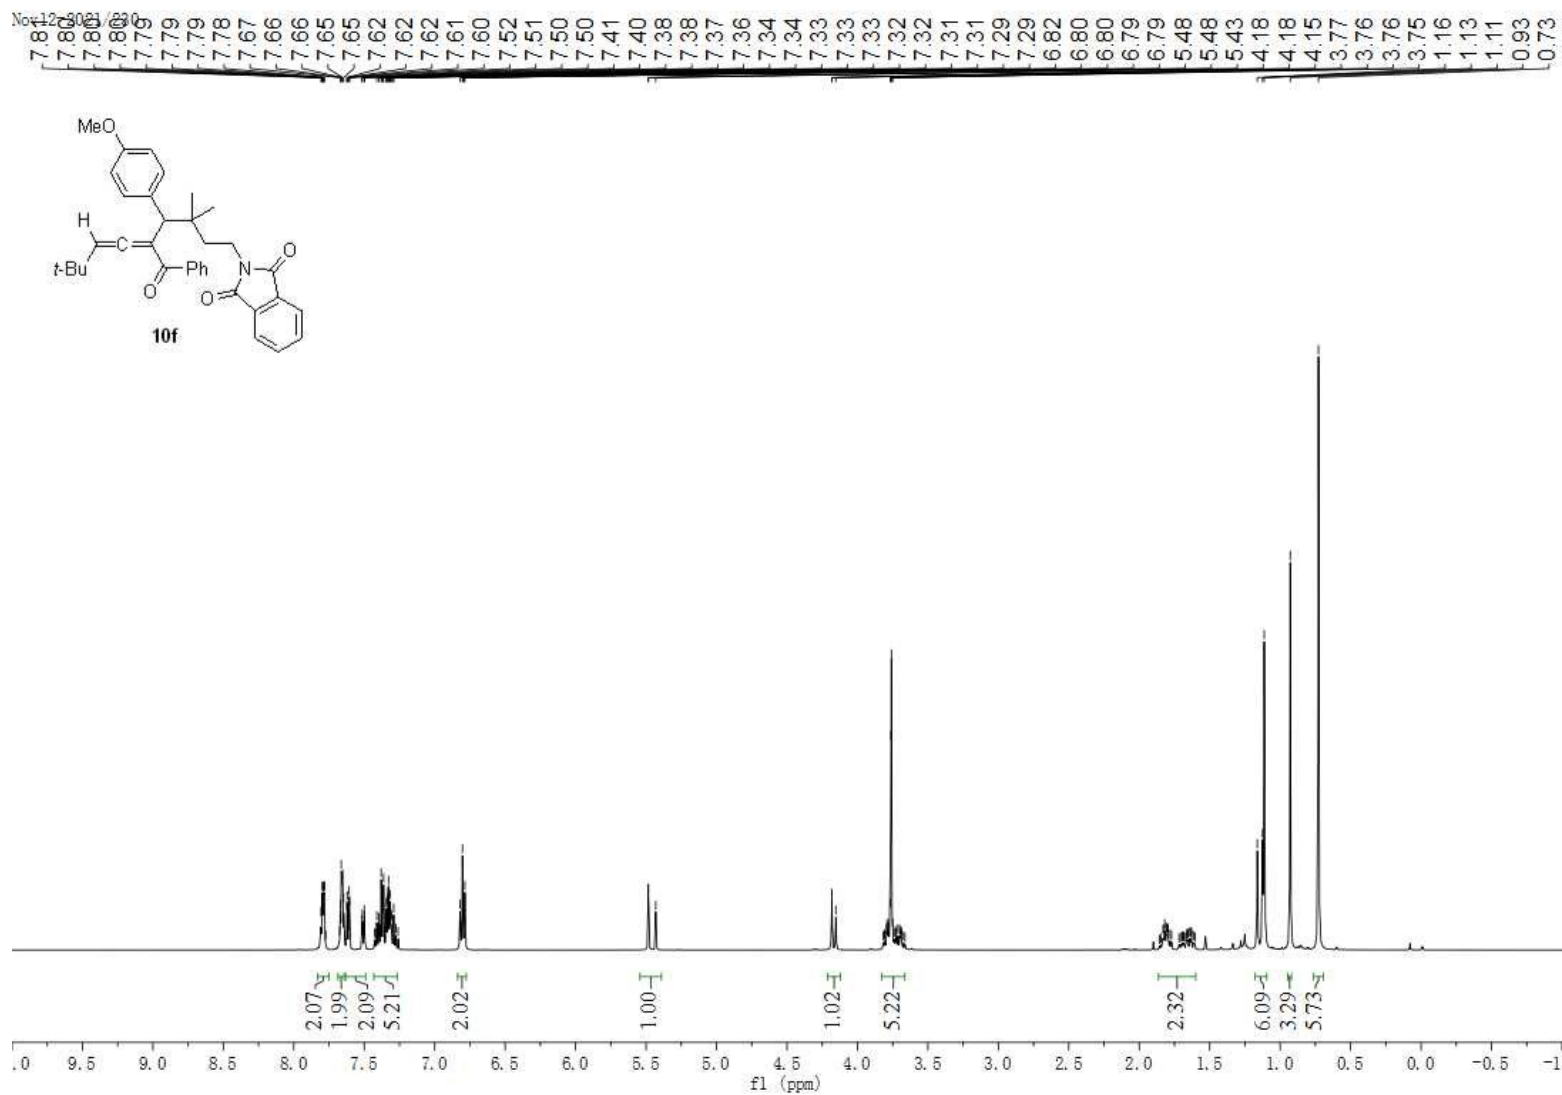

Nov 12, 2021/231

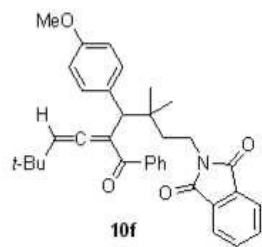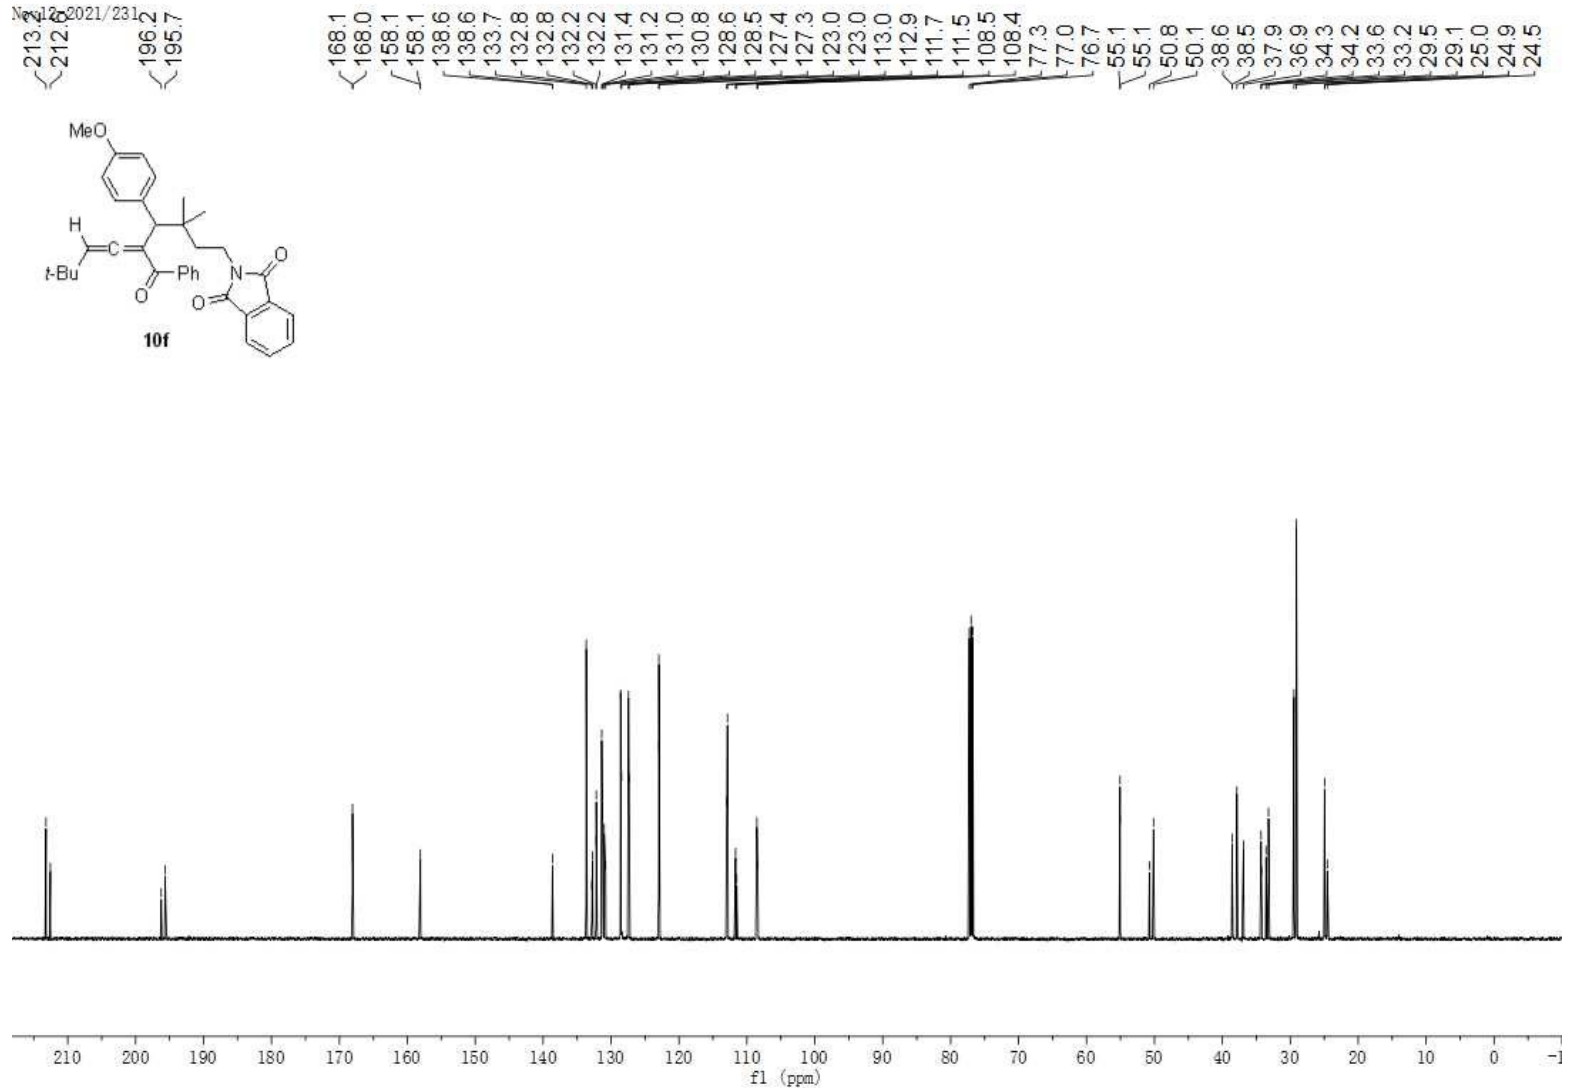

7.66  
7.64  
7.64  
7.55  
7.53  
7.45  
7.44  
7.42  
7.40  
7.40  
7.37  
7.37  
7.36  
7.35  
7.34  
7.34  
7.32  
7.31  
7.30  
7.29  
7.29  
7.27  
7.26  
7.26  
6.95  
6.94  
6.92  
6.90  
6.90  
6.88  
6.87  
6.85  
6.83  
5.47  
5.46  
4.24  
4.18  
4.12  
4.10  
4.09  
4.08  
4.07  
4.06  
4.05  
3.80  
1.95  
1.94  
1.94  
1.92  
1.91  
1.89  
1.89  
1.88  
1.87  
1.16  
1.13  
0.97  
0.74

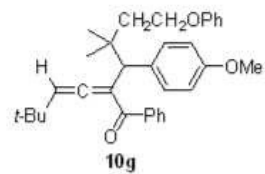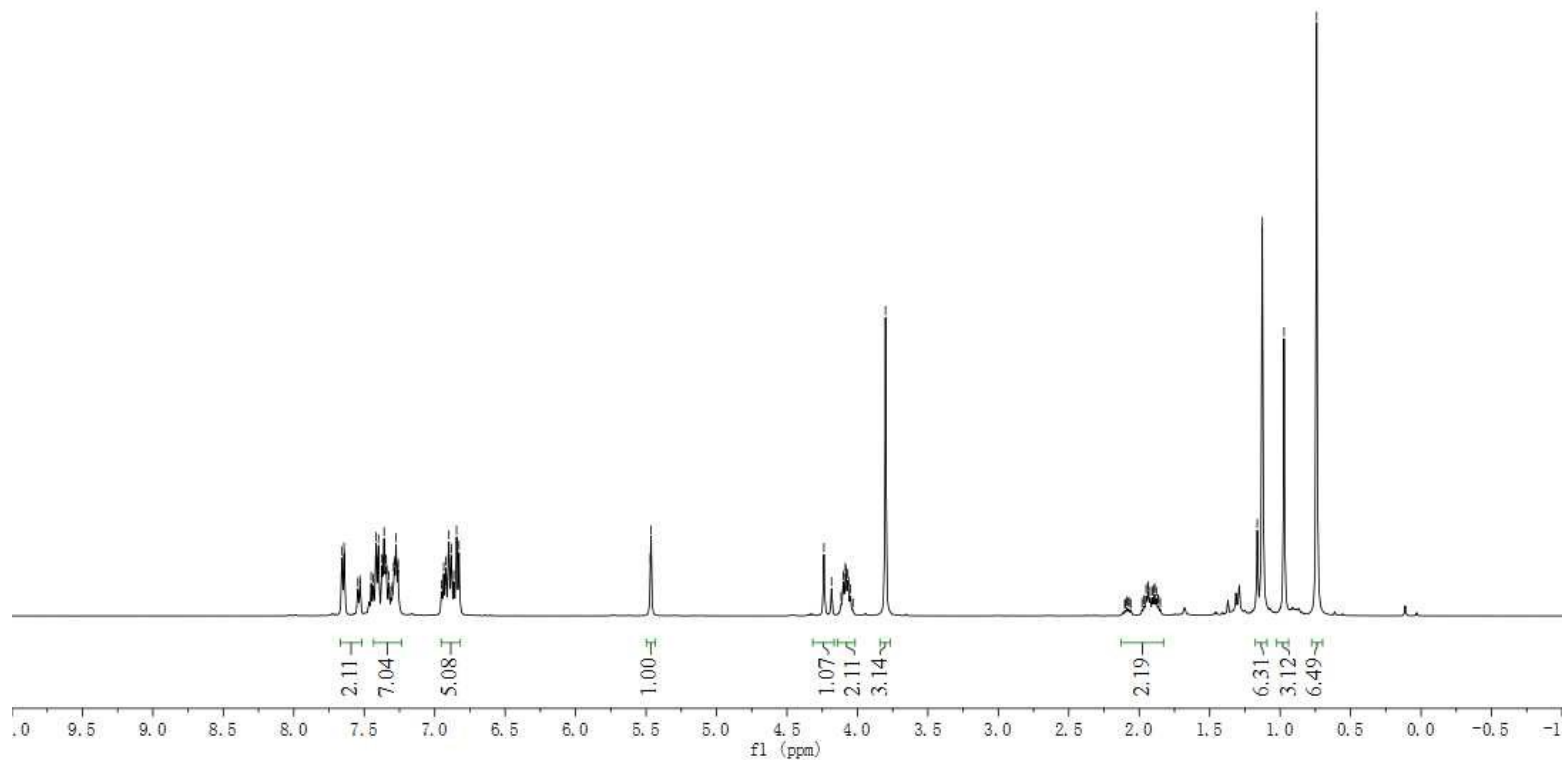

No. 2021/191  
213.2  
212.5  
196.2  
195.6

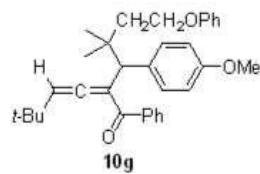

159.0  
158.9  
158.1  
158.1  
138.6  
138.5  
133.1  
133.0  
131.4  
131.3  
131.2  
131.0  
129.3  
128.7  
128.5  
127.5  
127.4  
120.4  
120.4  
114.5  
113.0  
112.9  
111.8  
111.6  
108.5  
108.3  
77.3  
77.0  
76.7  
64.8  
64.7  
55.1  
55.1  
51.3  
50.6  
39.1  
38.9  
37.9  
36.8  
33.6  
33.2  
29.5  
29.1  
25.8  
25.6  
25.2  
25.2

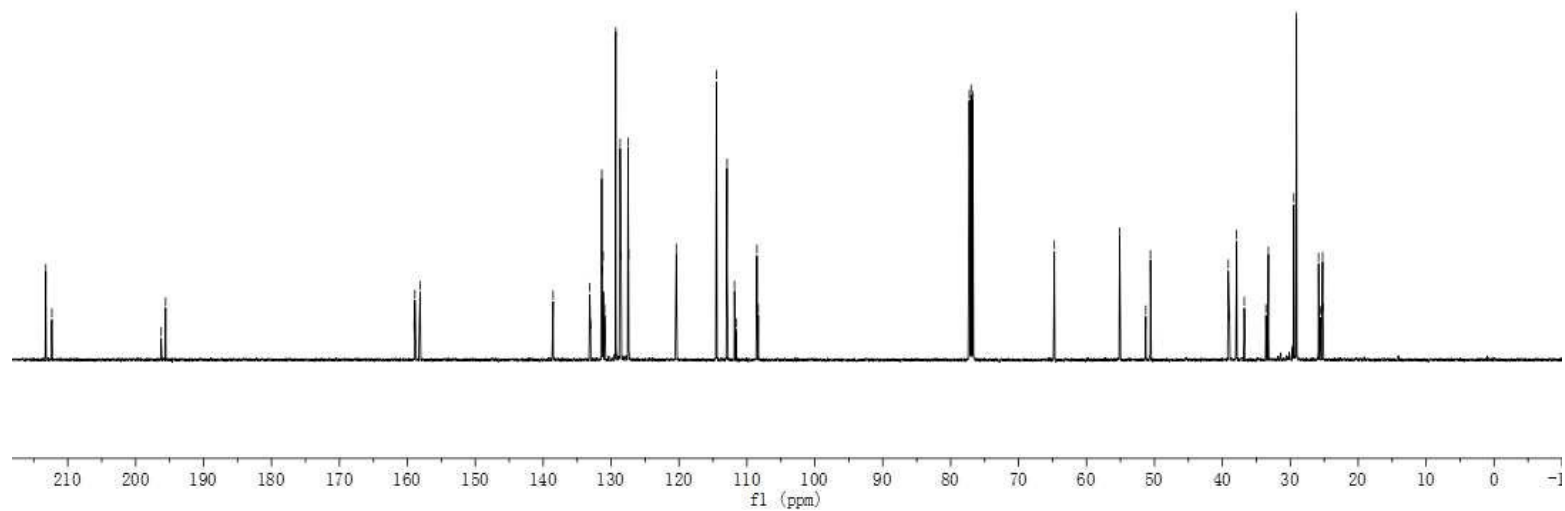

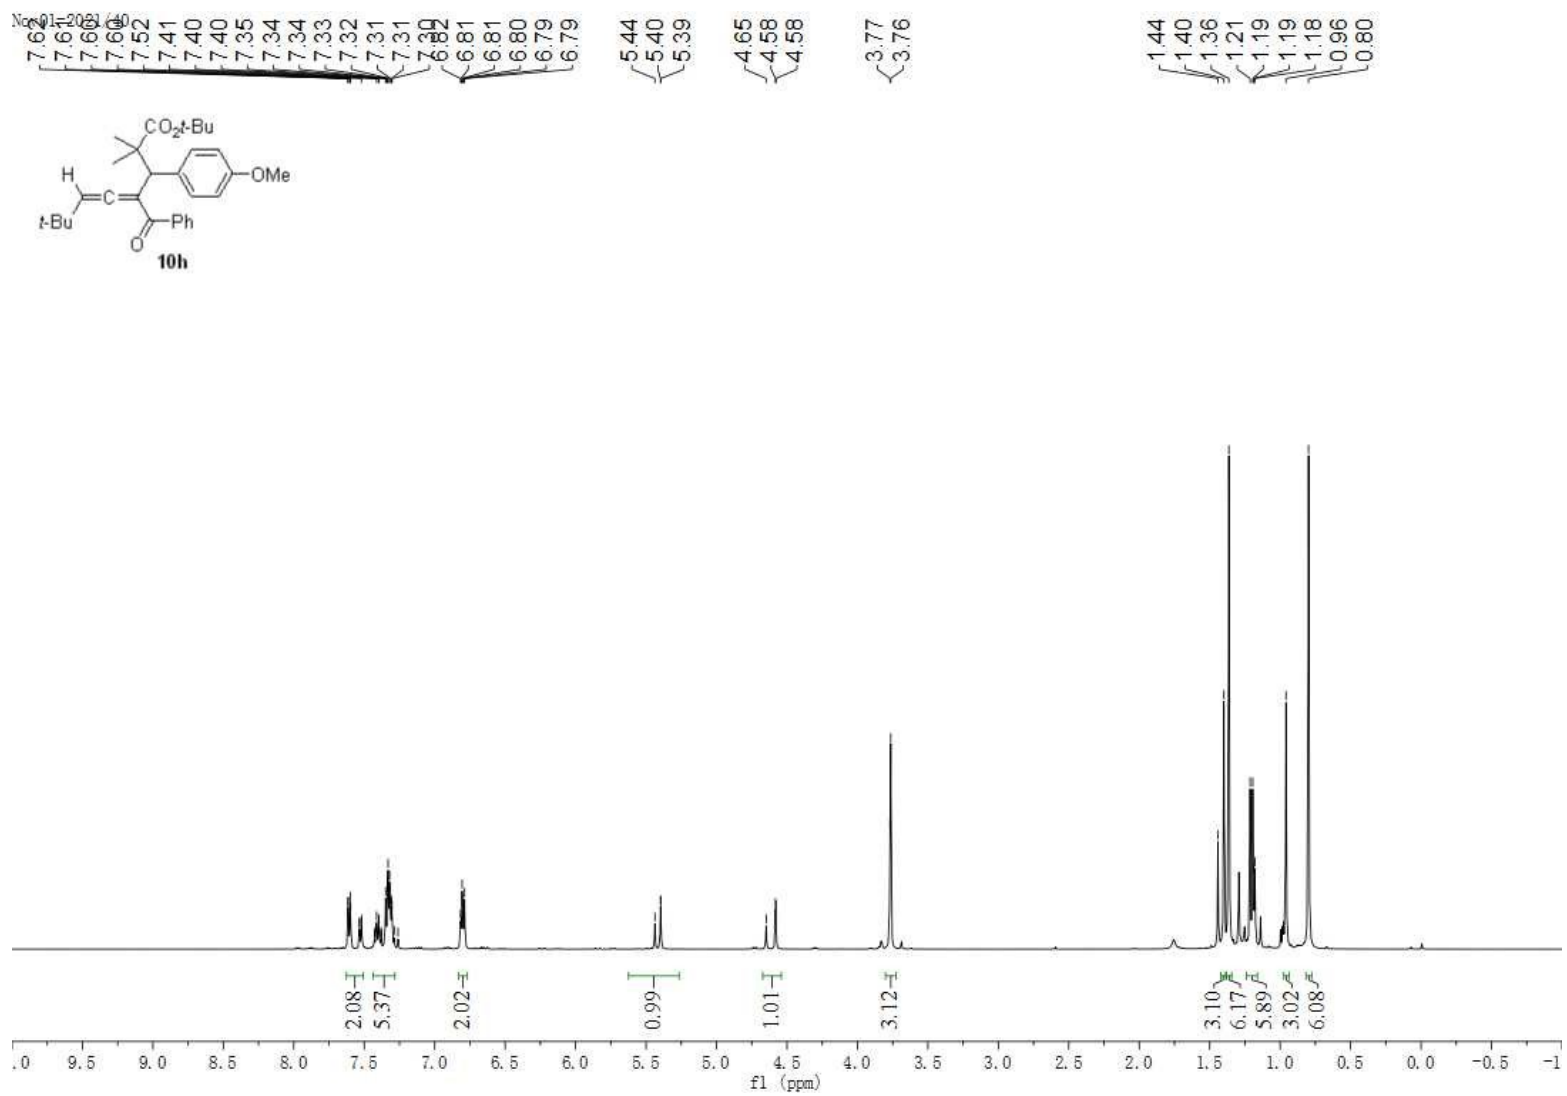

No. 2021/41

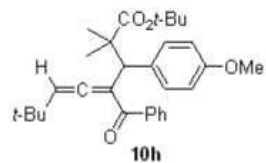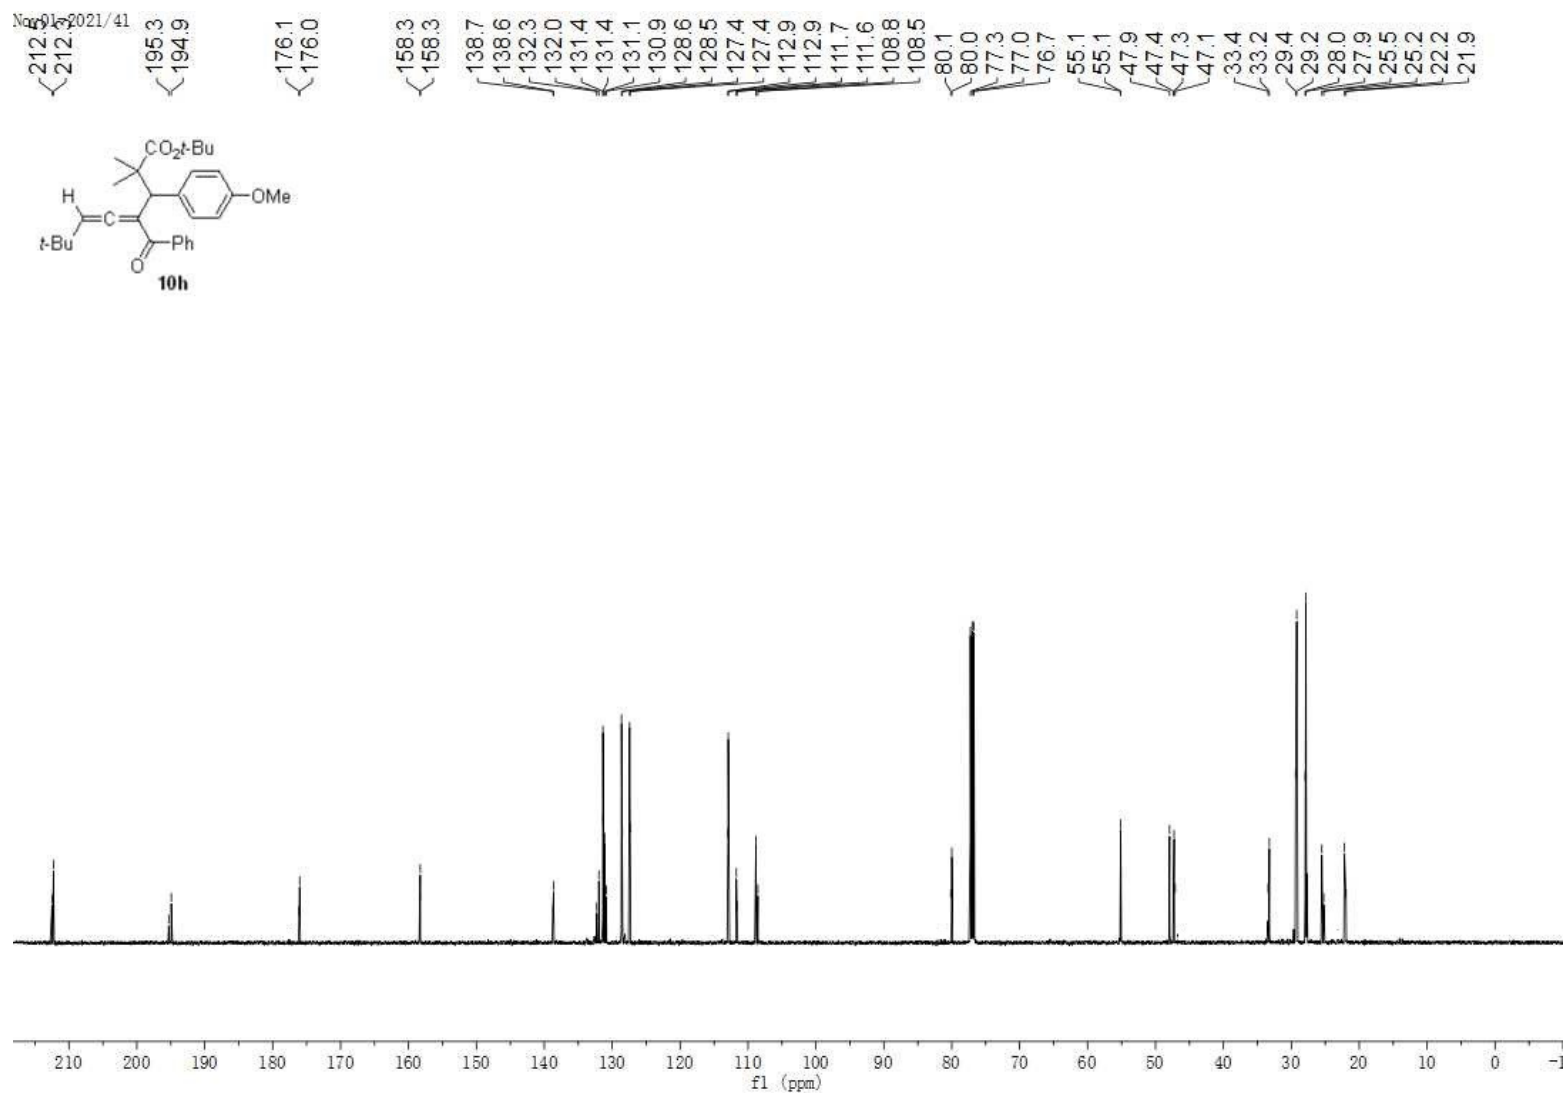

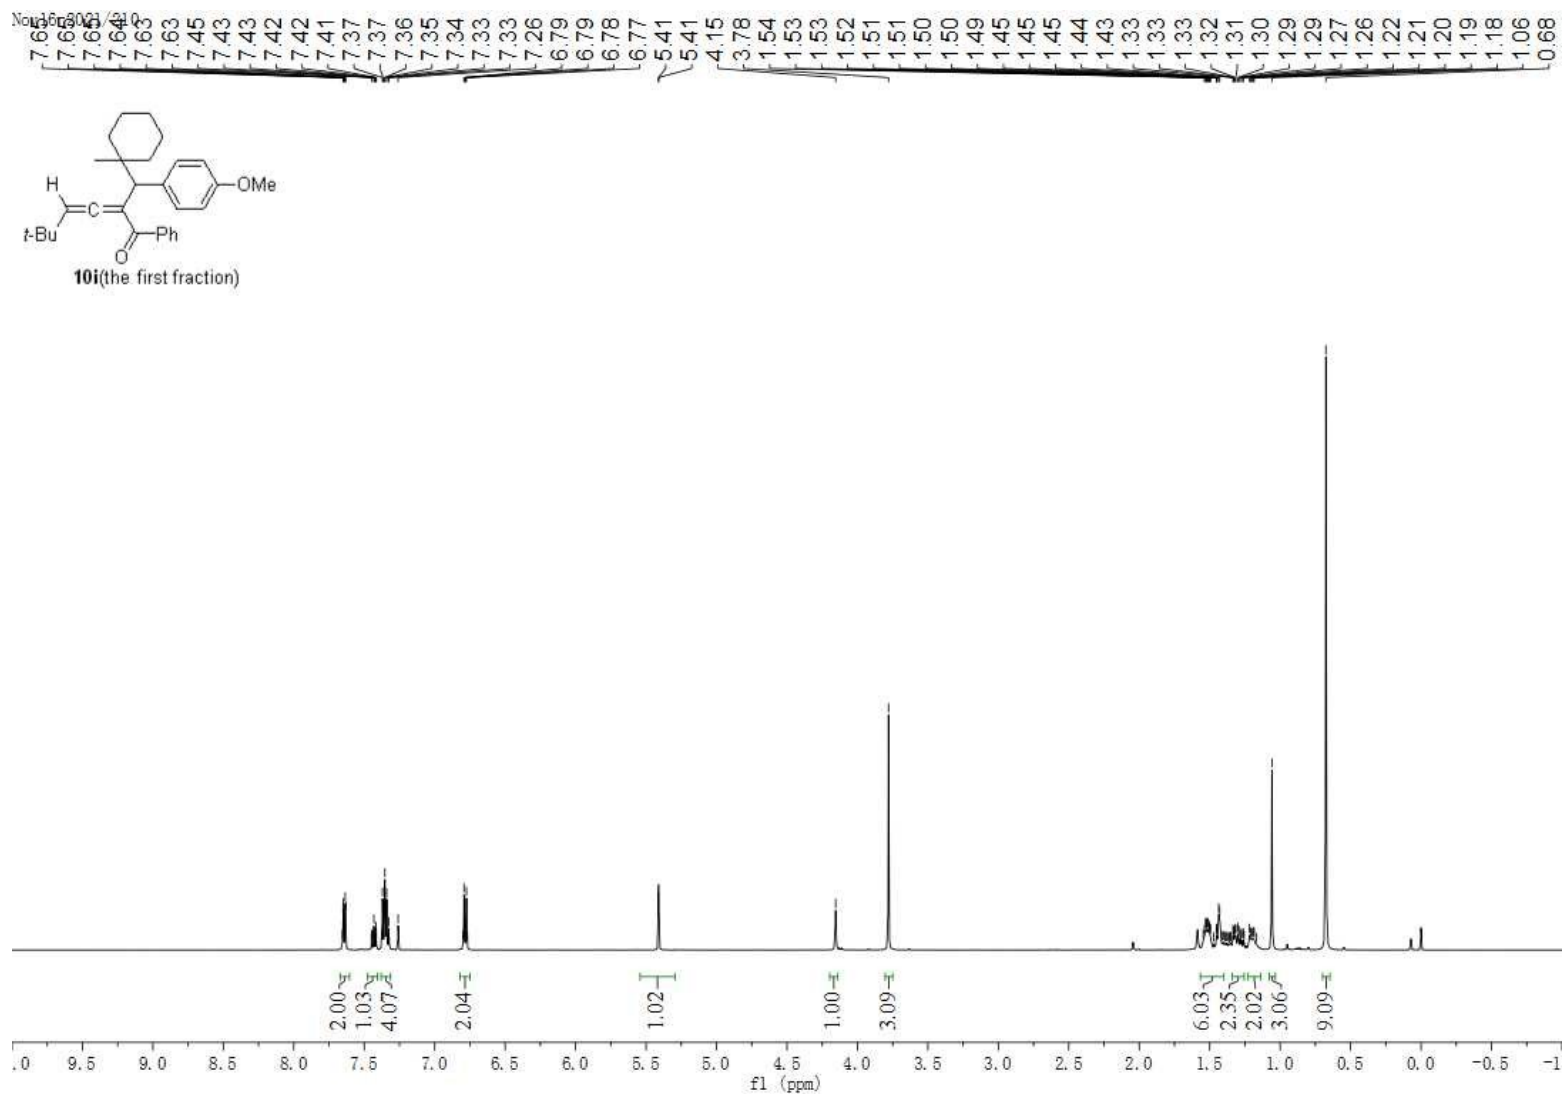



Nov 26-2021/211

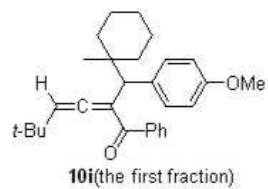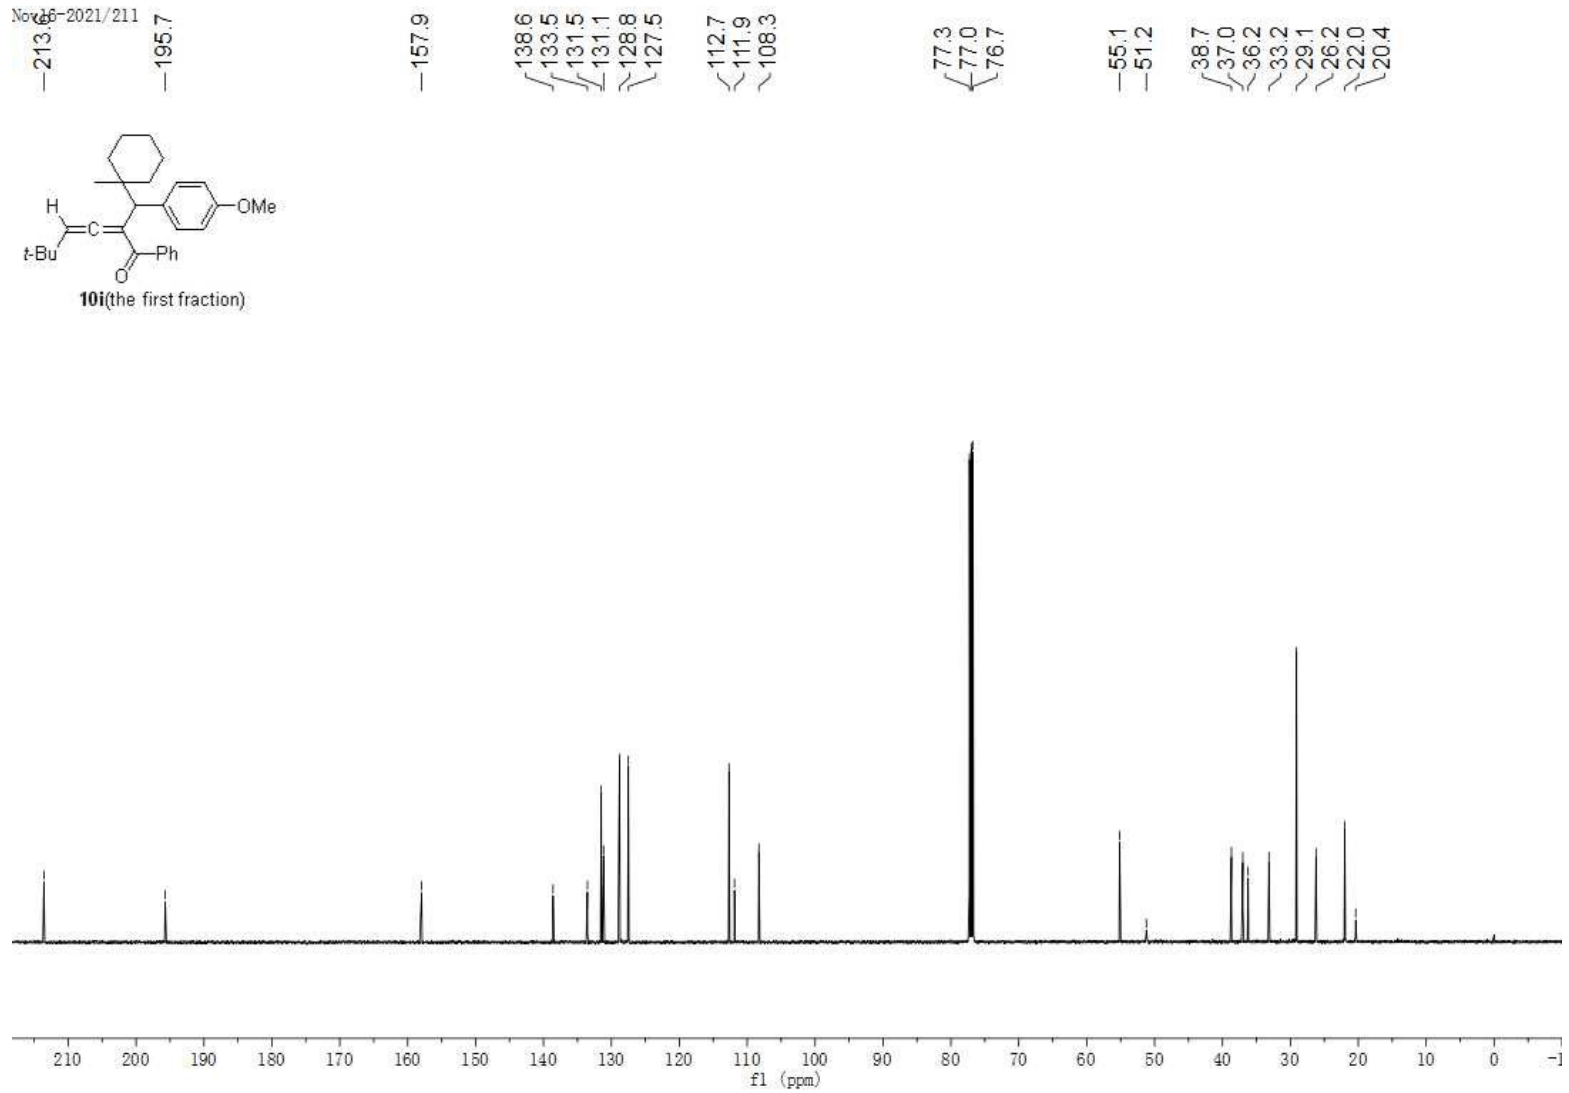

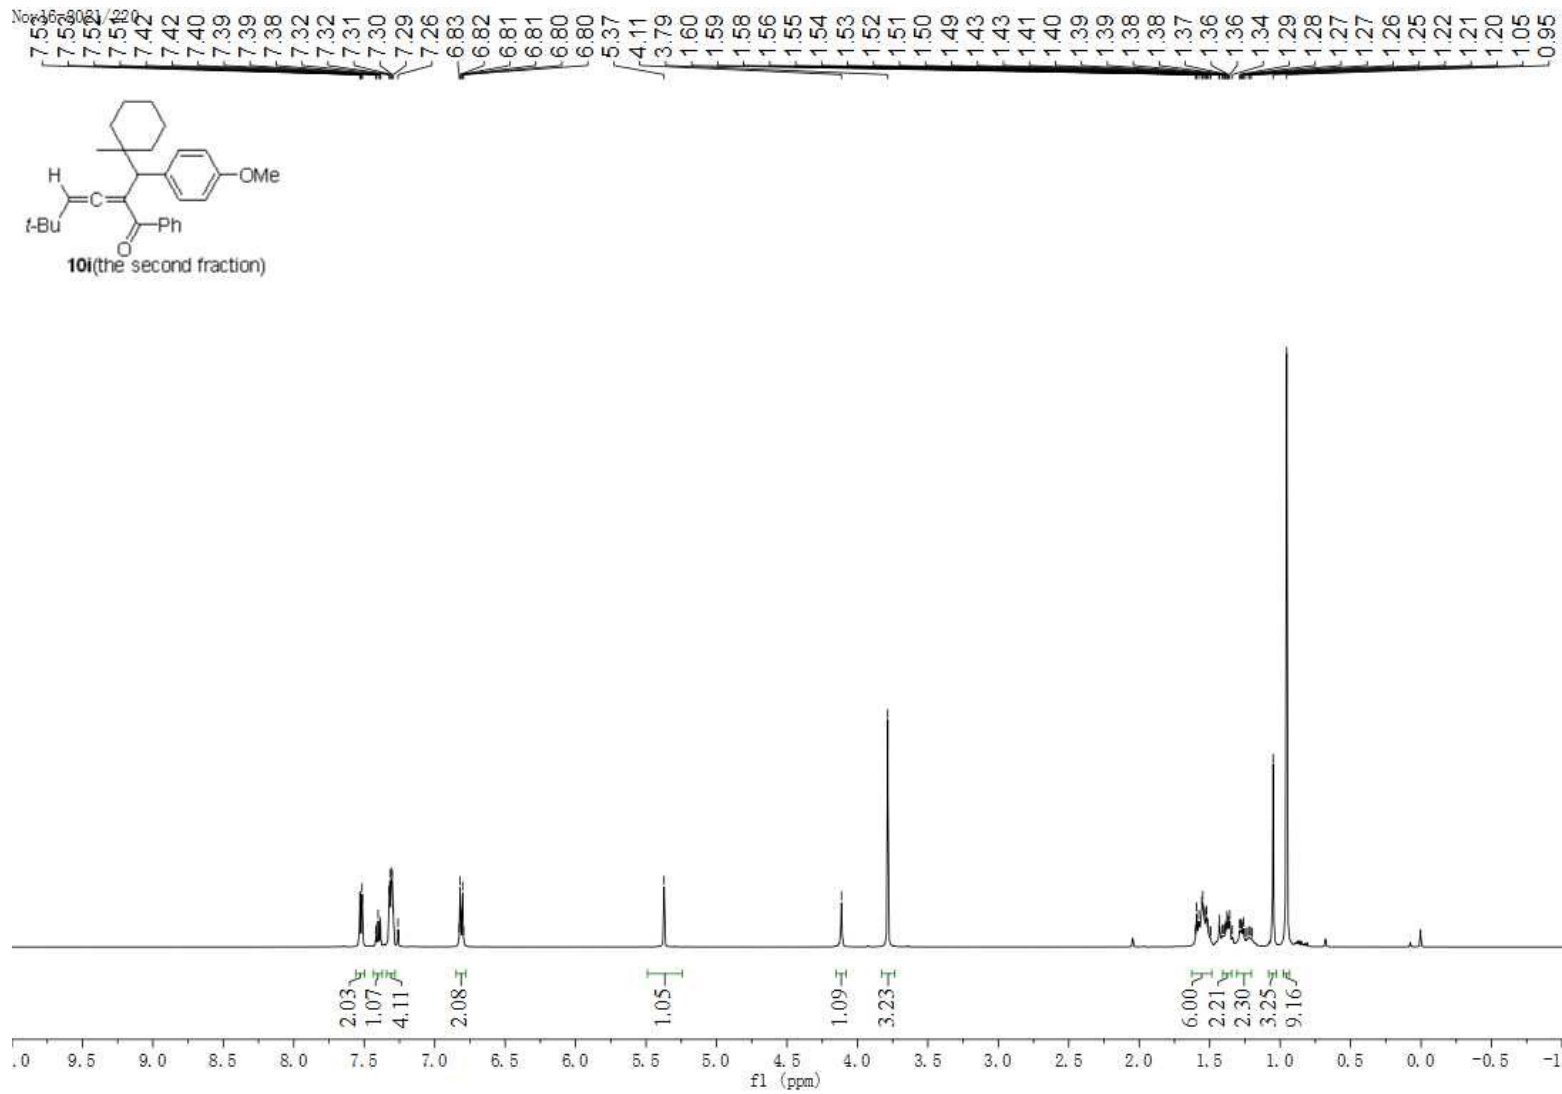

Nov 26 2021/231

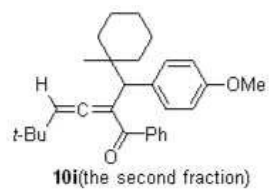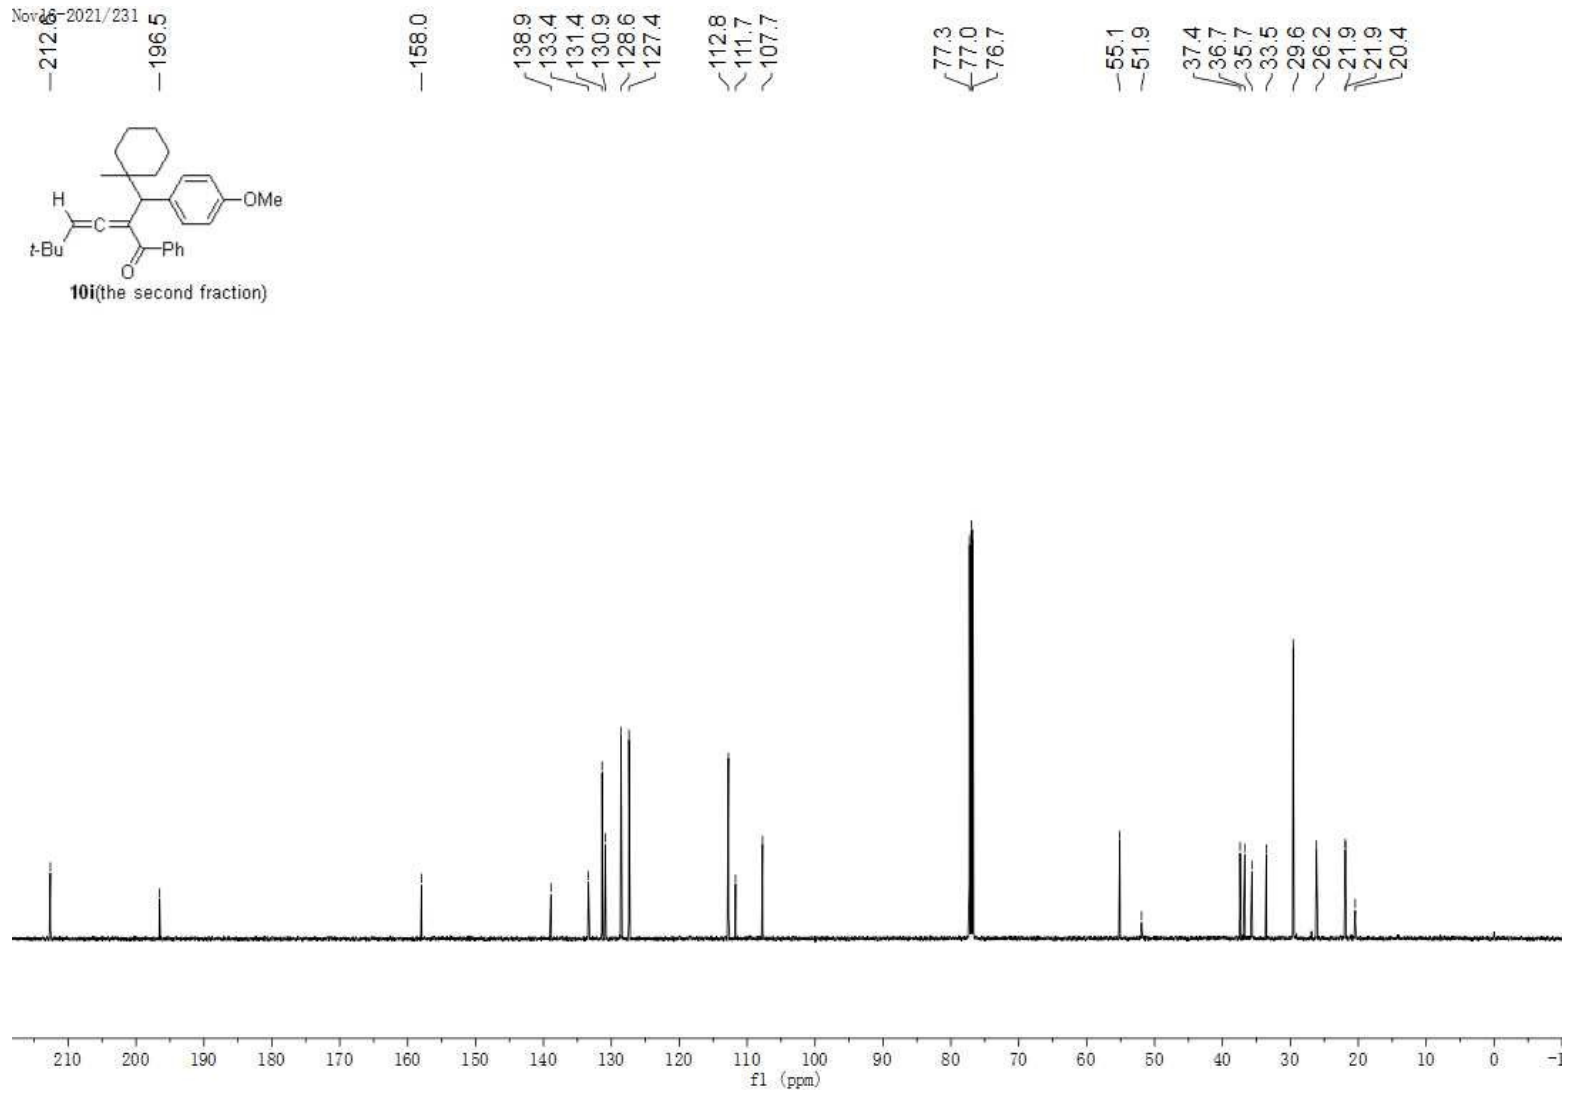

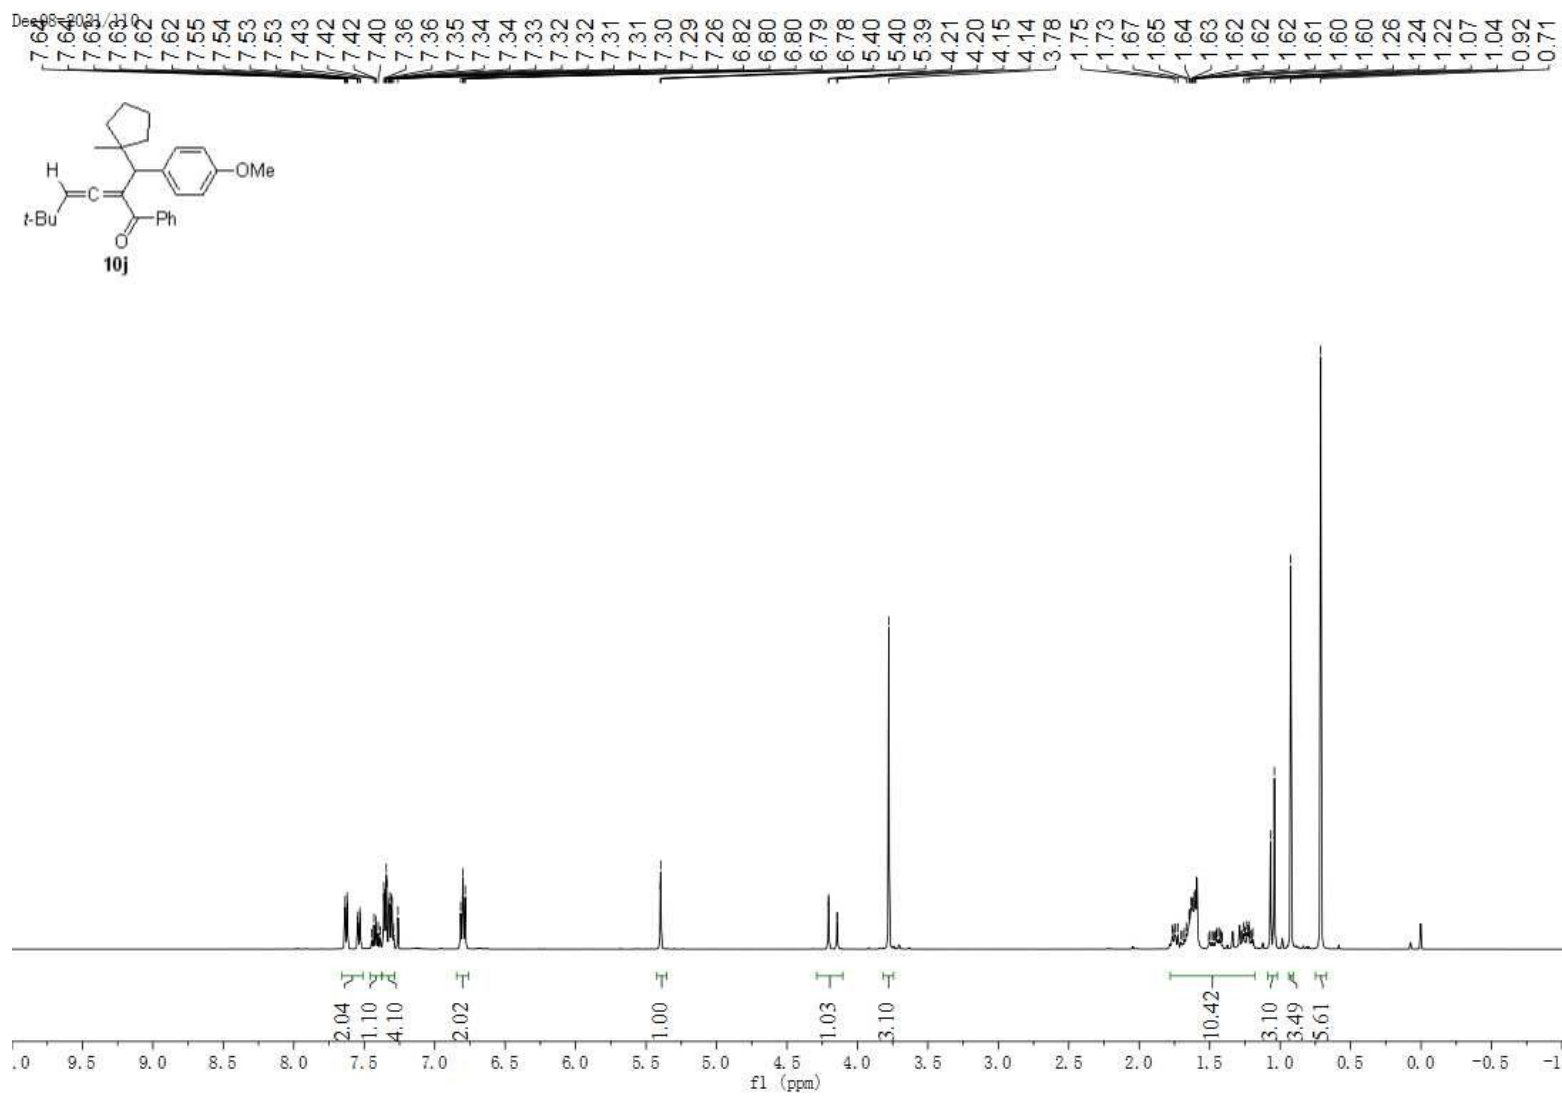

Dec-08-2021/111

213.4  
212.1  
196.4  
195.8

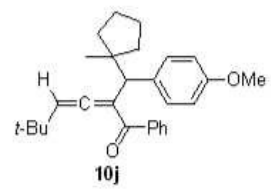

157.9  
157.9  
138.8  
138.7  
134.7  
134.4  
131.2  
131.0  
130.9  
130.9  
128.7  
128.6  
127.5  
127.4  
112.9  
112.9  
112.7  
112.5  
108.2  
108.2

77.3  
77.0  
76.7

55.2  
55.1  
51.2  
50.6  
47.6  
46.7  
39.0  
38.9  
38.0  
37.3  
33.5  
33.2  
29.5  
29.2  
24.3  
24.2  
24.0  
23.9  
23.8

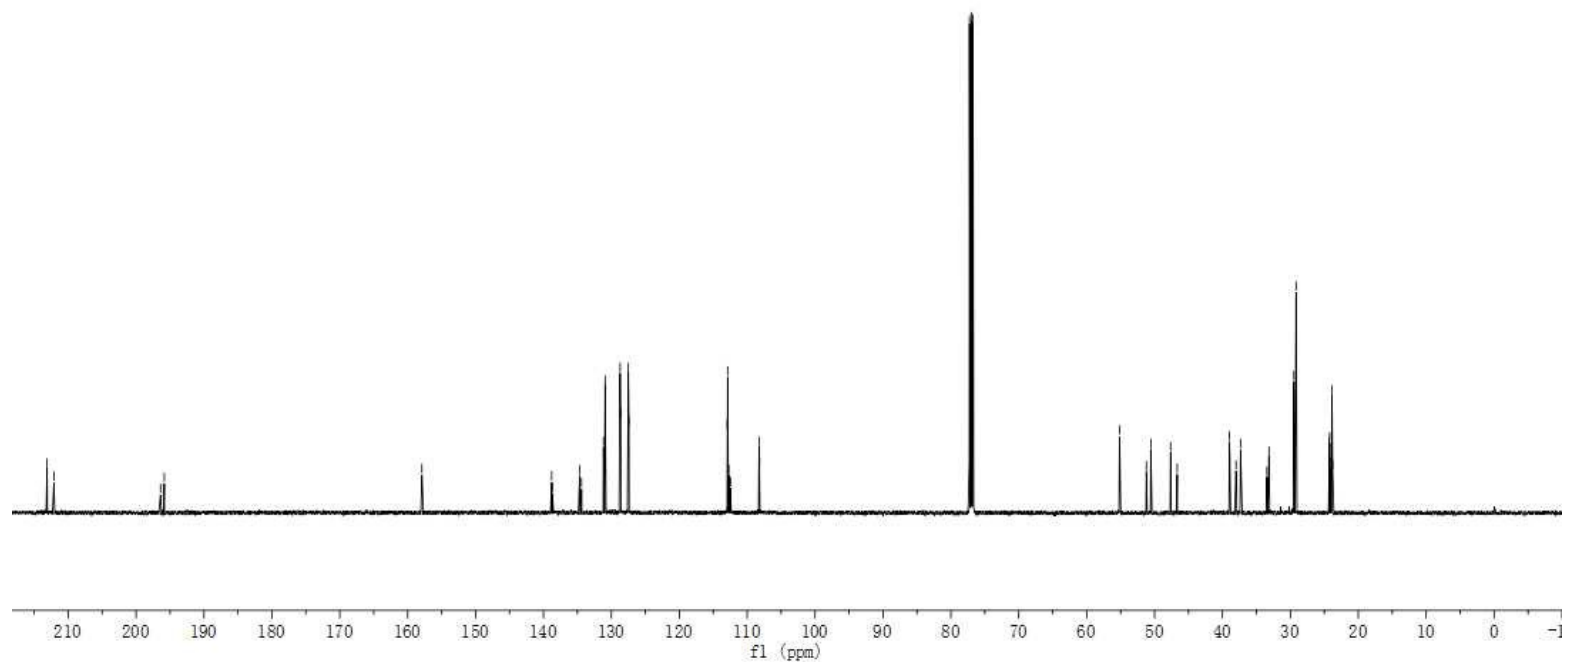

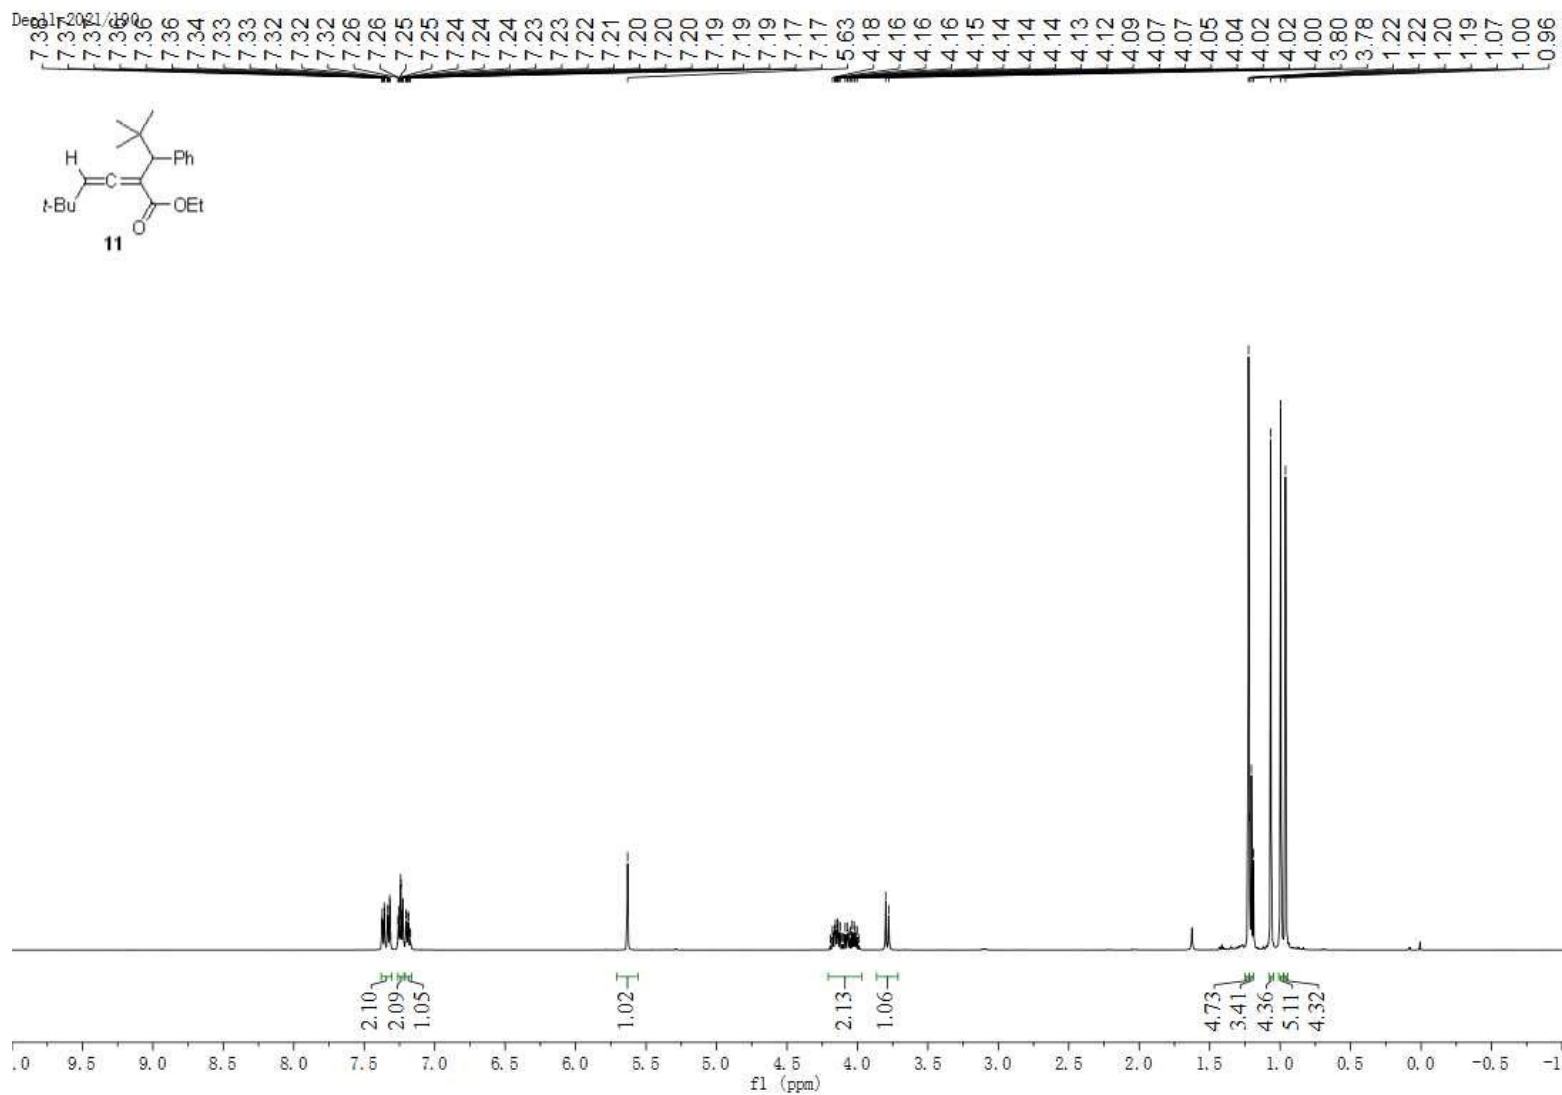

Dec12 2021/191

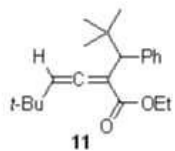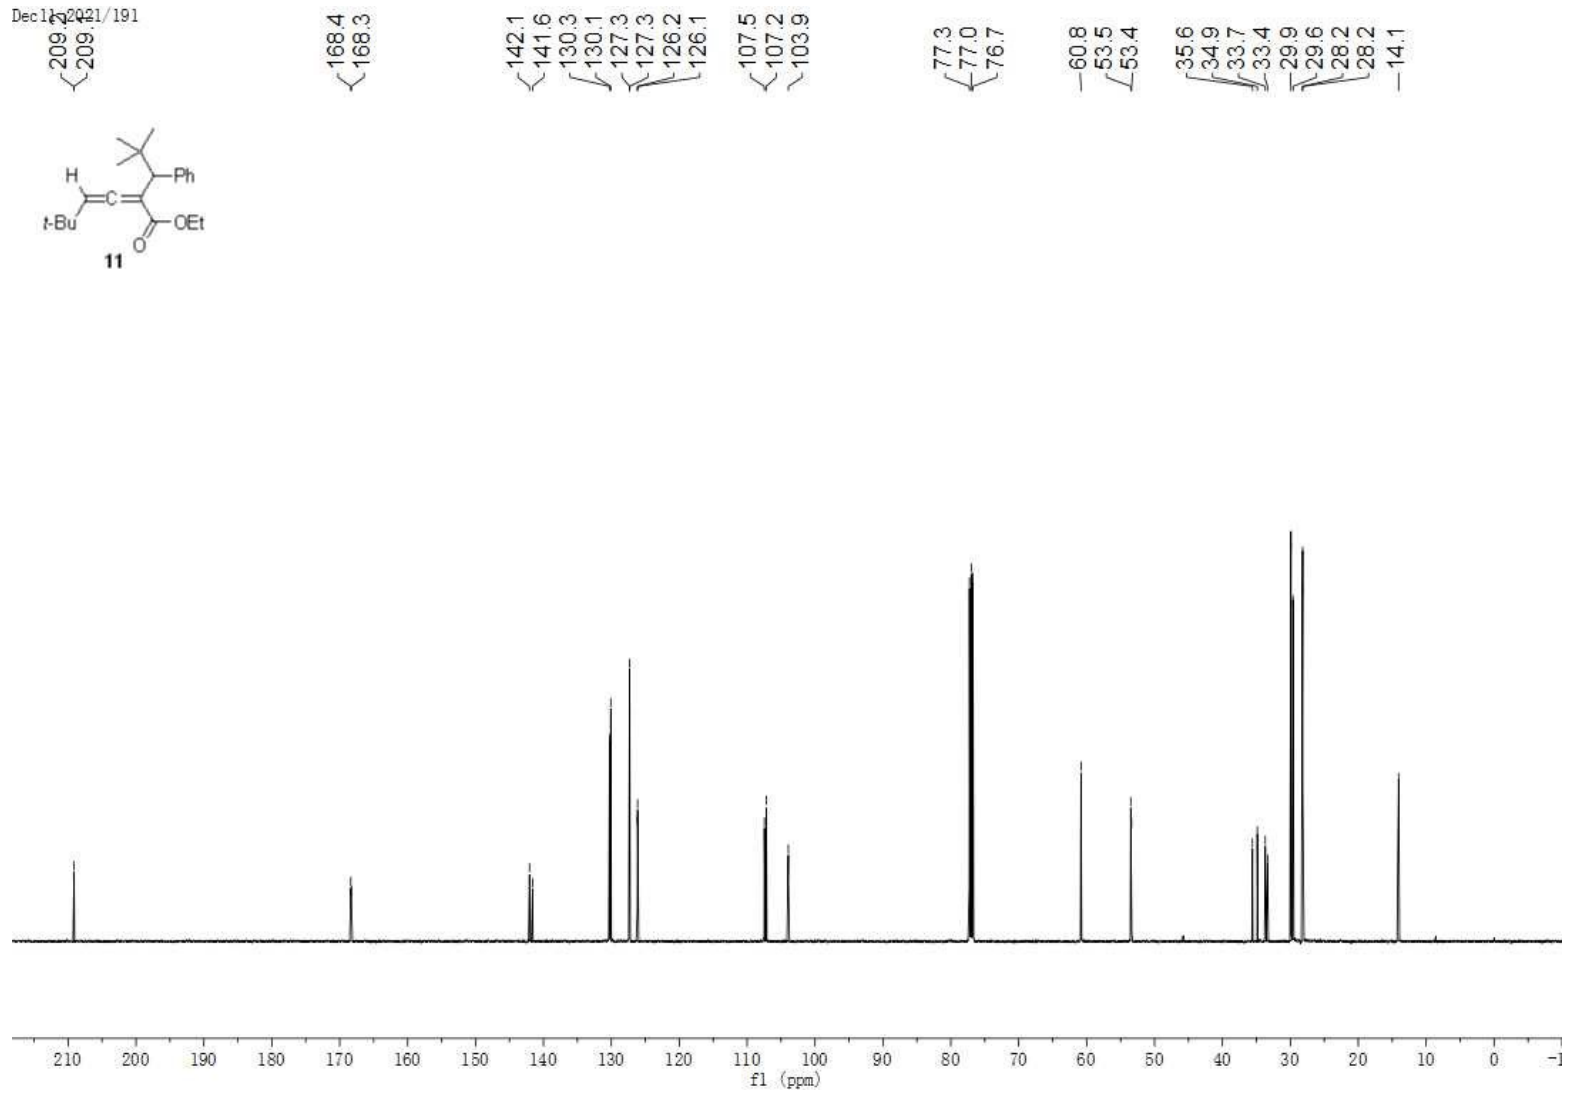

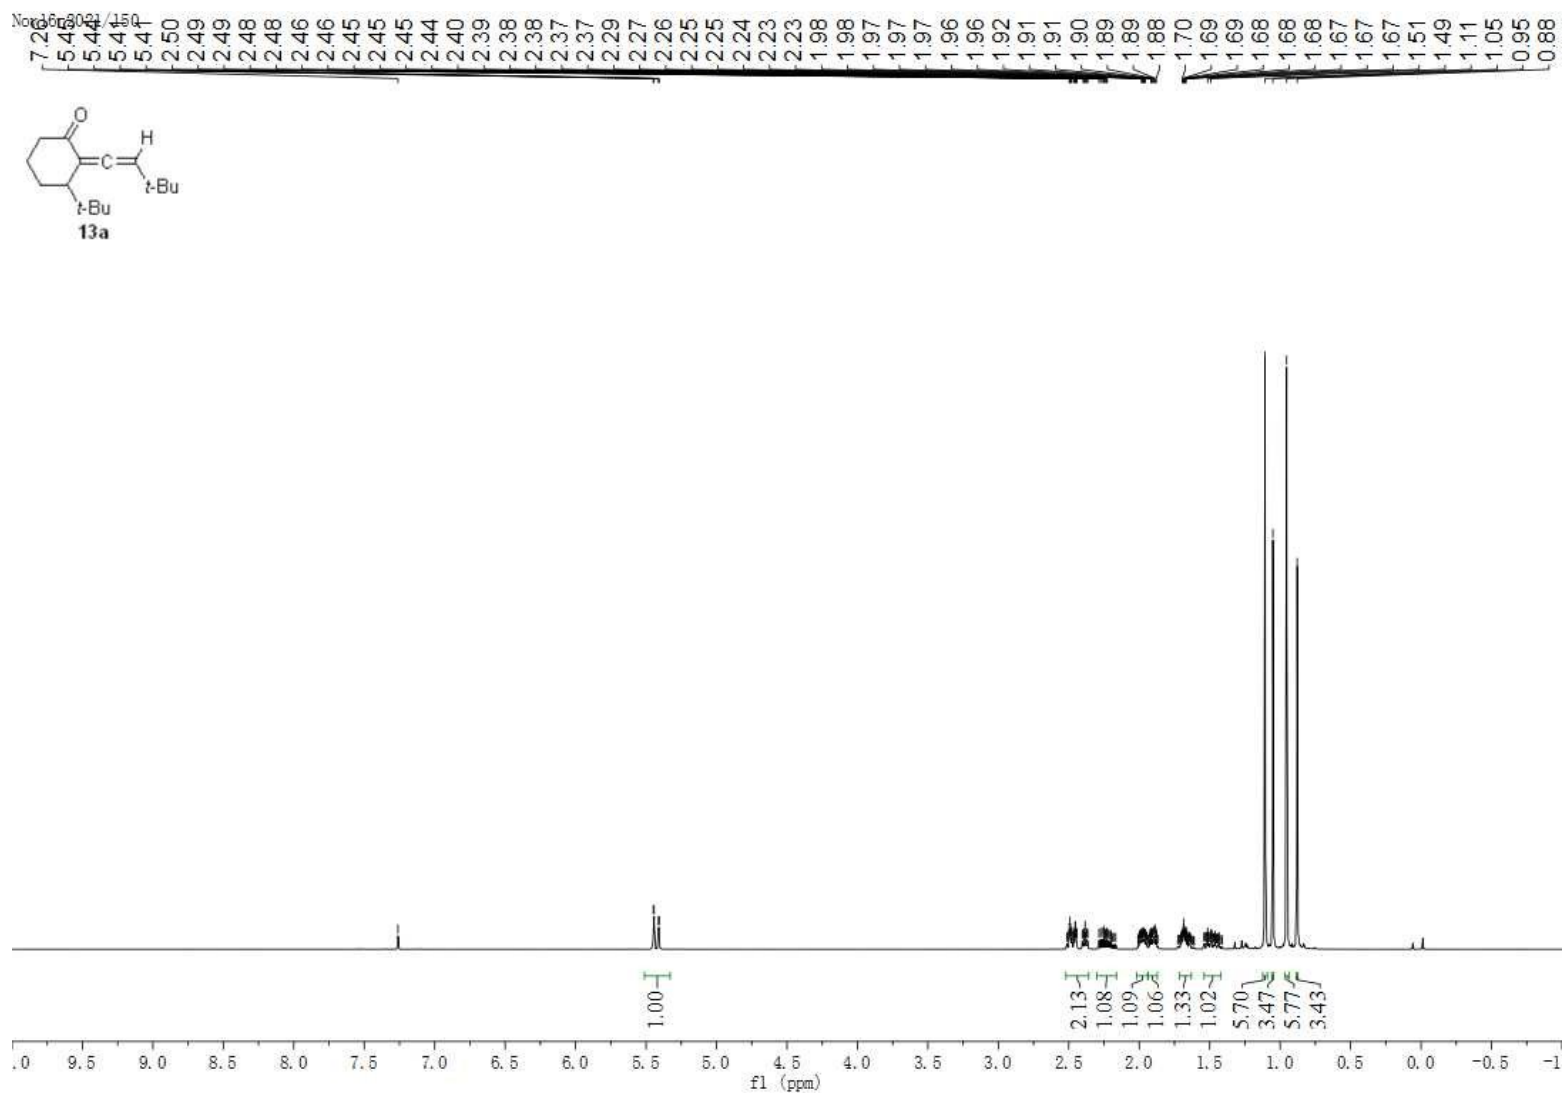



Nov 17, 2021 16:54

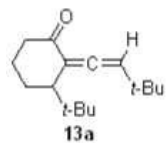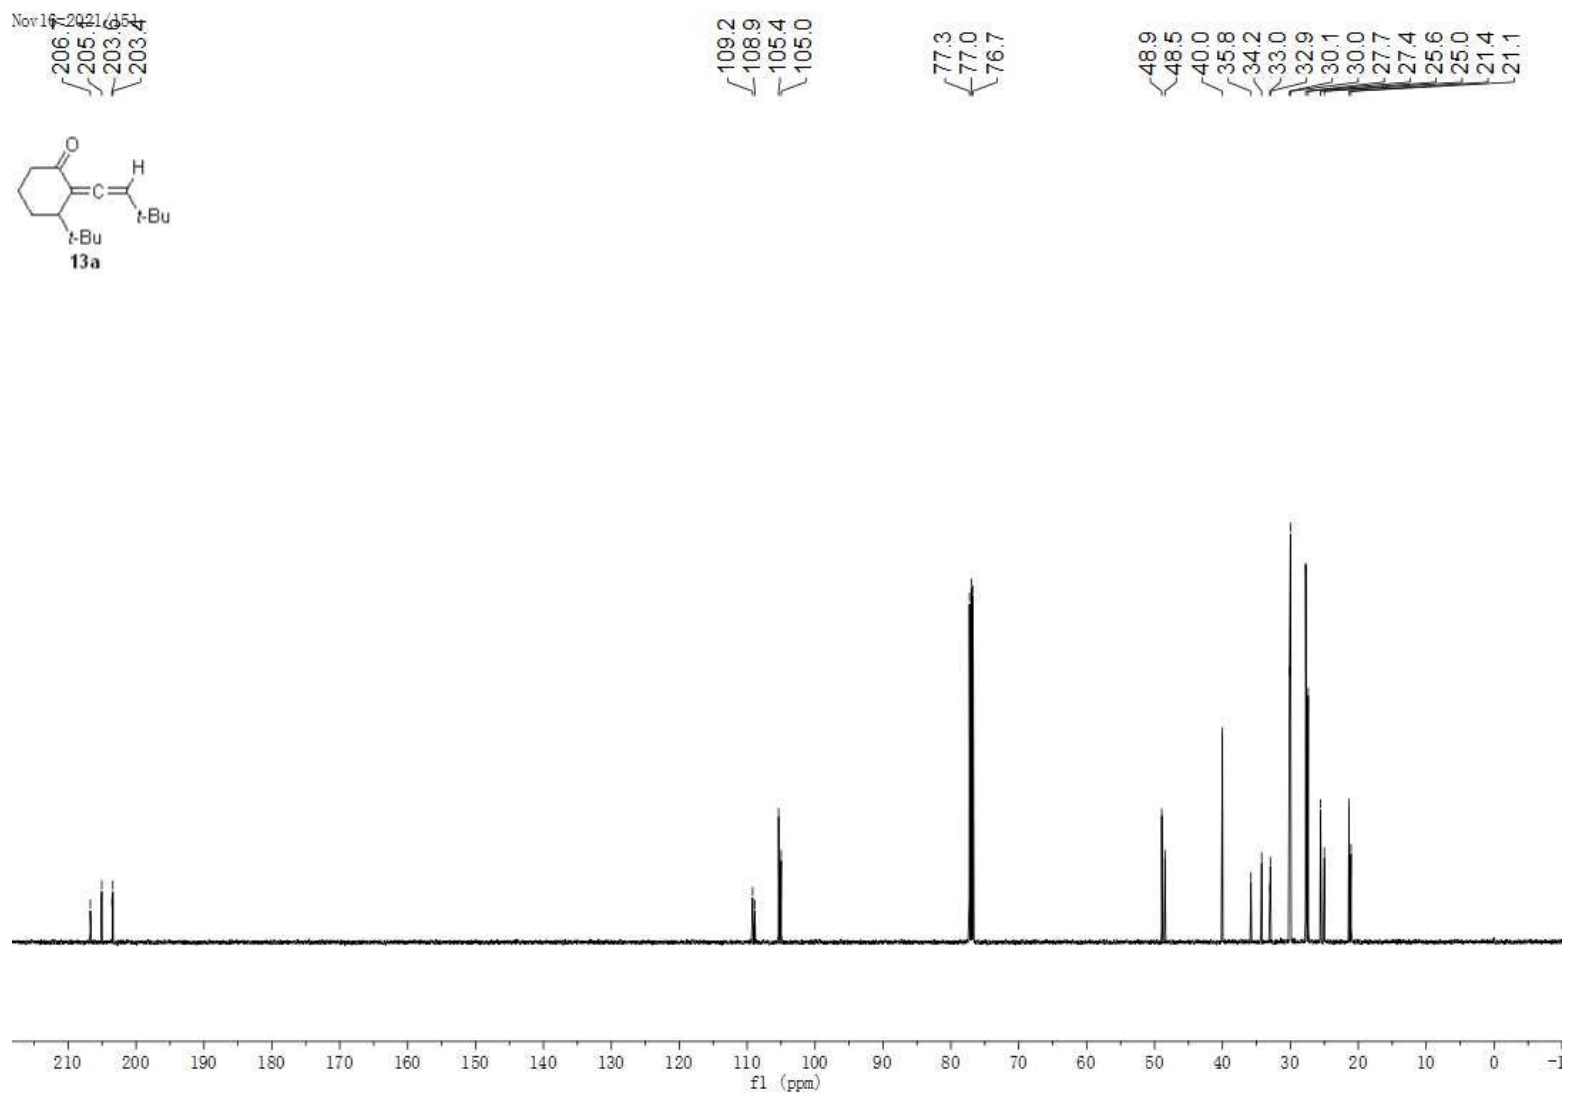

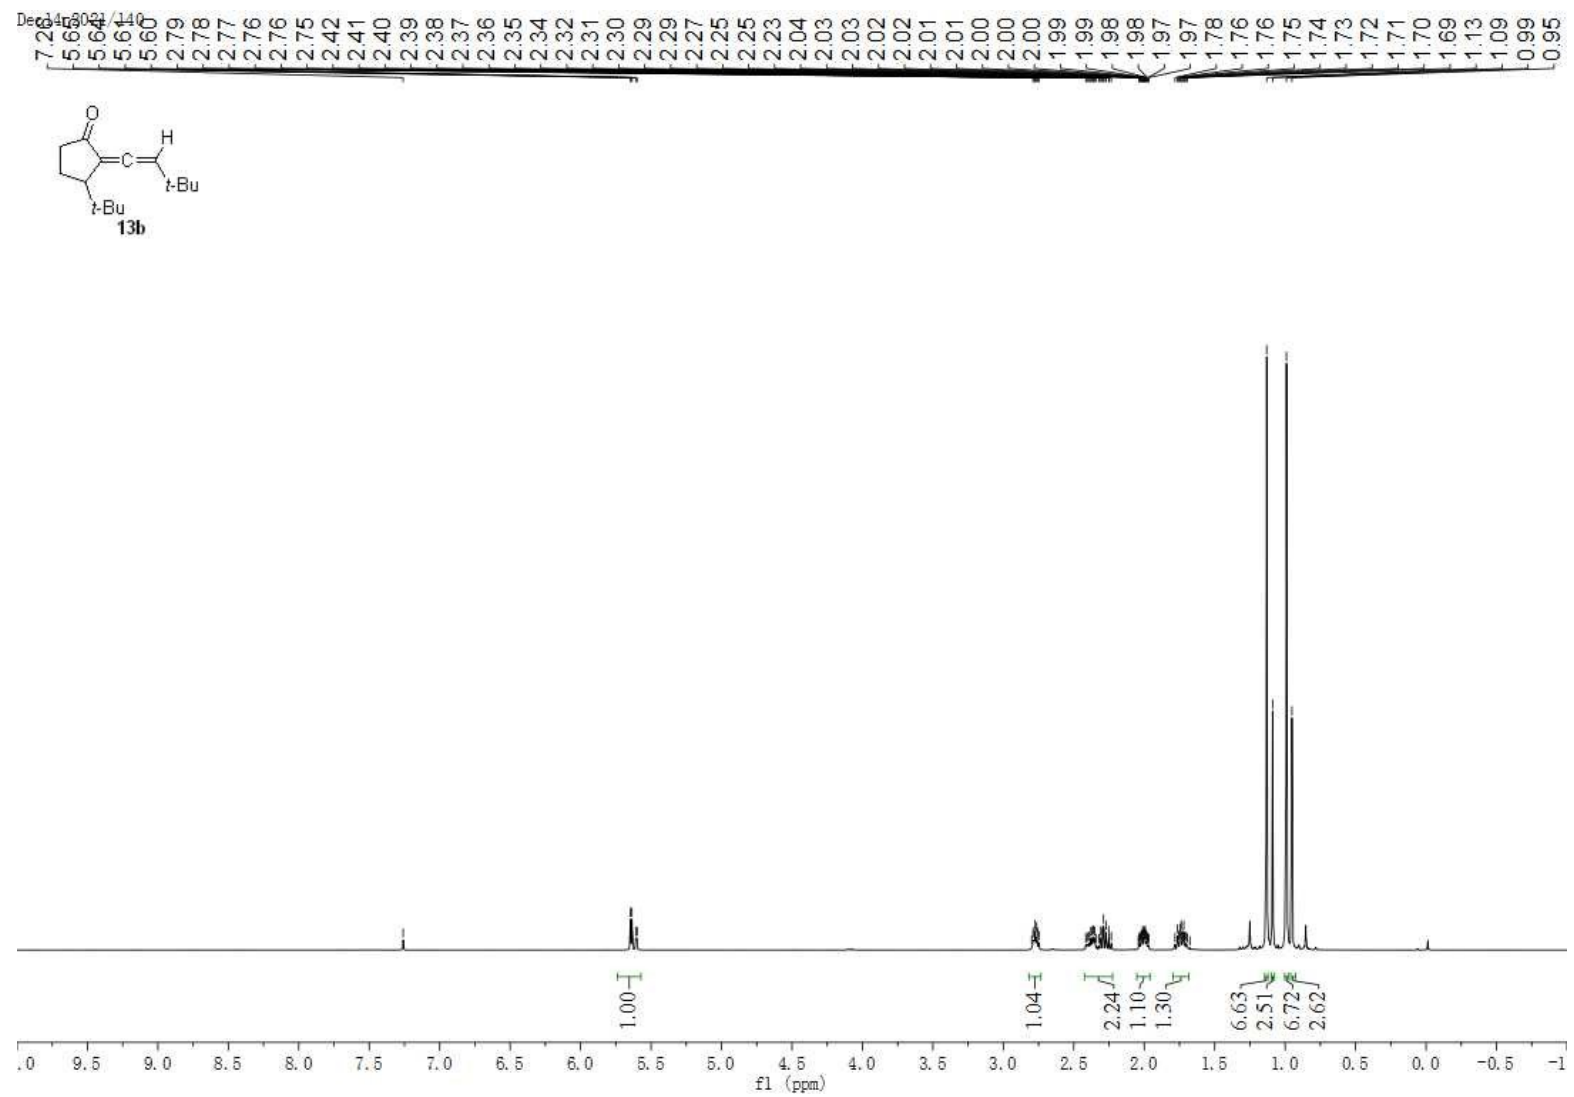

Dec 14 2021 14:11

207.6  
207.2  
204.2  
203.7

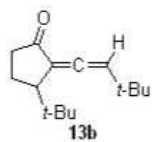

107.9  
107.8  
107.7  
107.5

77.3  
77.0  
76.7

51.5  
51.2  
38.2  
34.2  
33.6  
33.6  
33.3  
30.2  
30.2  
27.5  
27.3  
23.0  
22.7

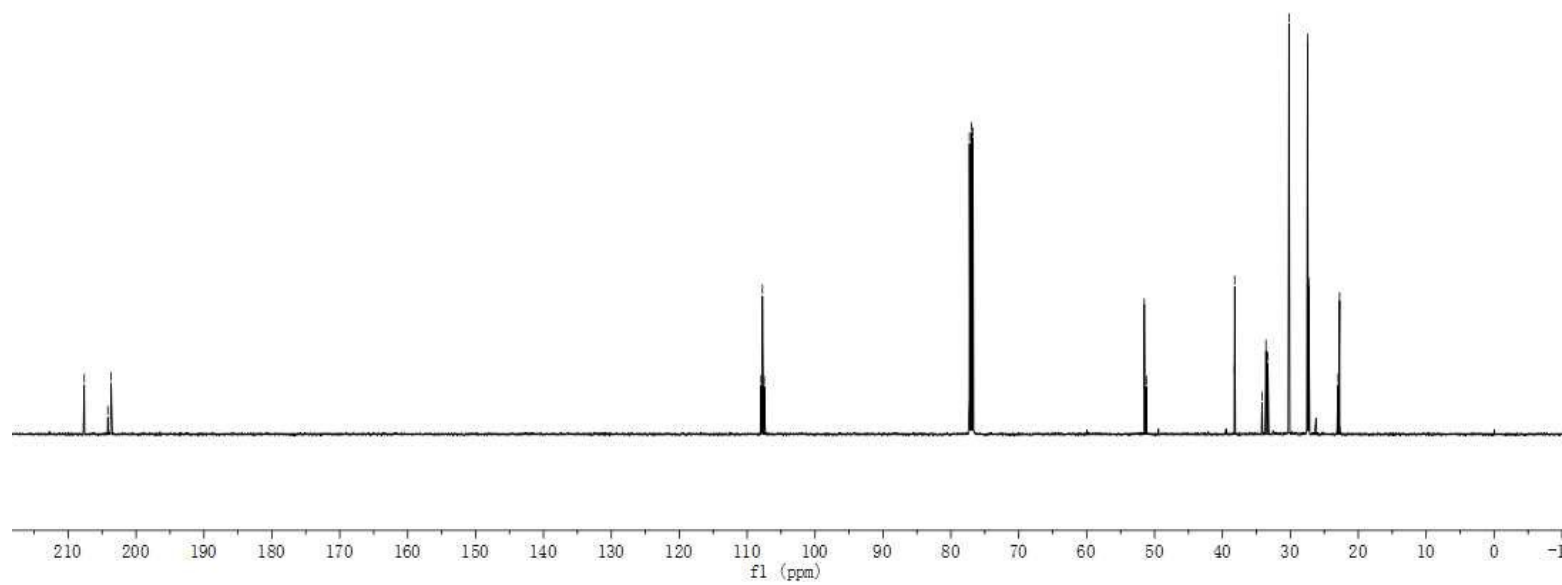

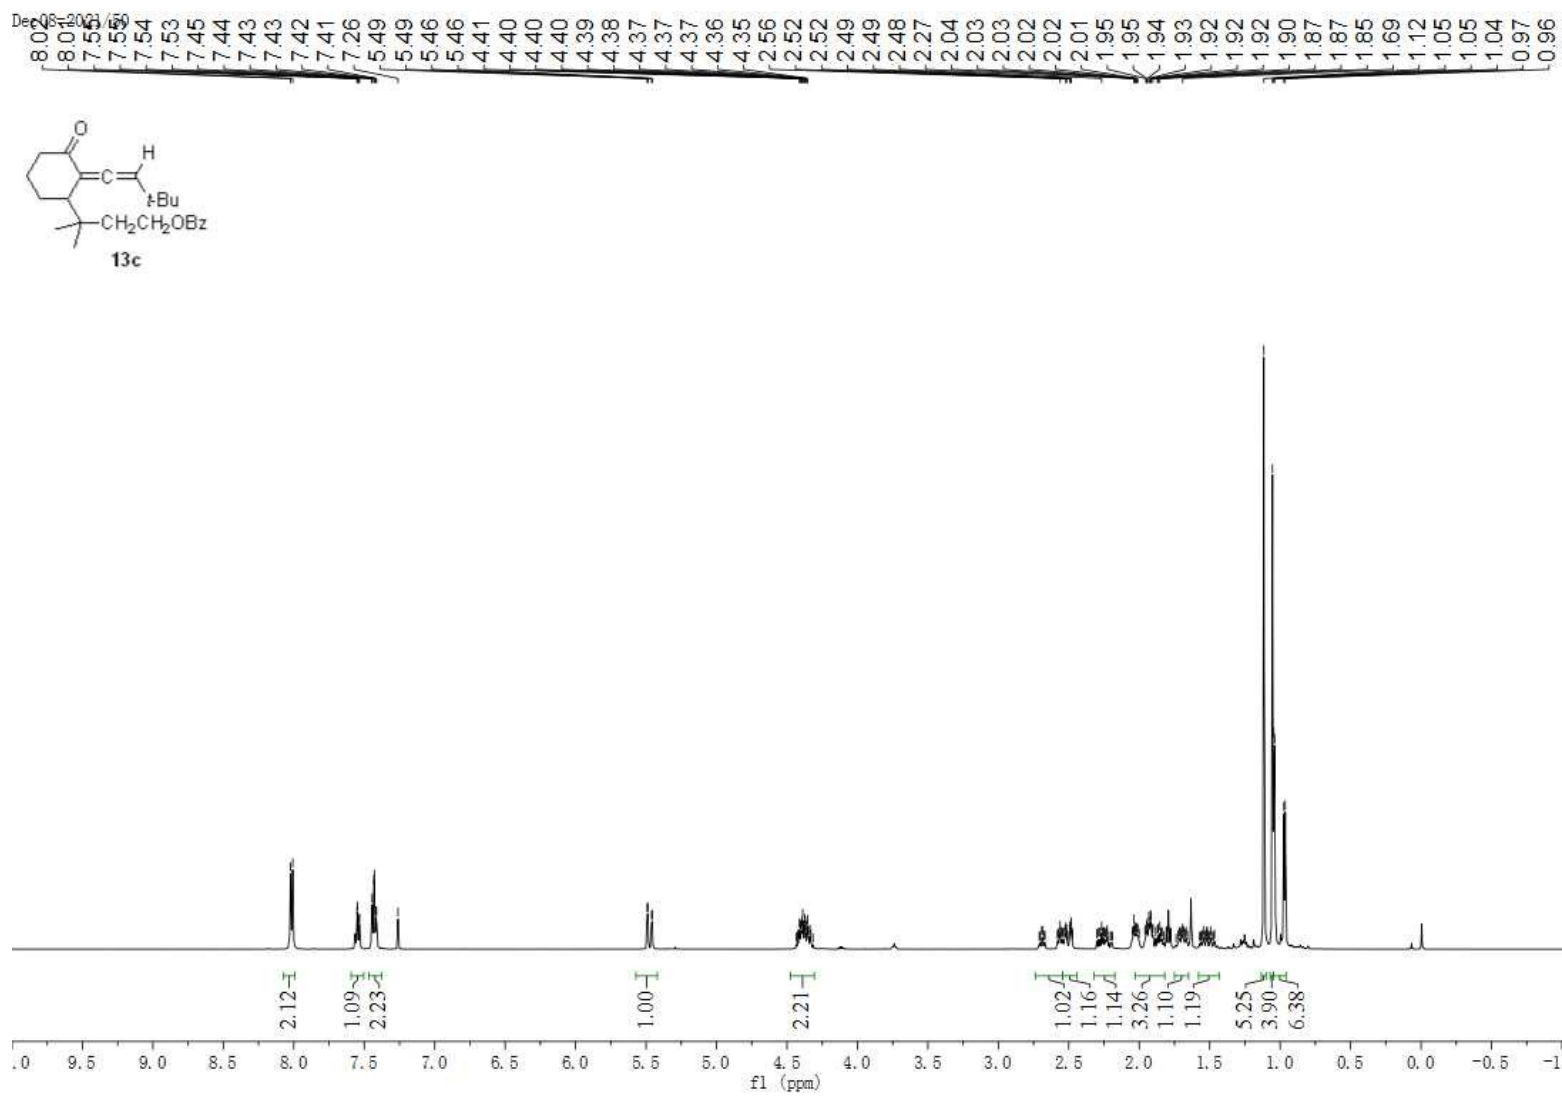

Dec 08 2021  
206.2  
205.3  
203.0

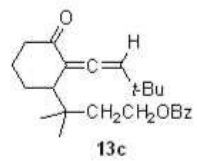

166.6

132.8  
130.3  
129.5  
128.3  
128.3

108.6  
108.3  
105.8  
105.4

77.3  
77.0  
76.7

62.1  
62.1

47.4  
46.6  
39.9  
38.0  
37.9  
37.6  
36.2  
33.0  
30.1  
30.0  
25.1  
24.9  
24.8  
24.7  
24.6  
21.3  
21.0

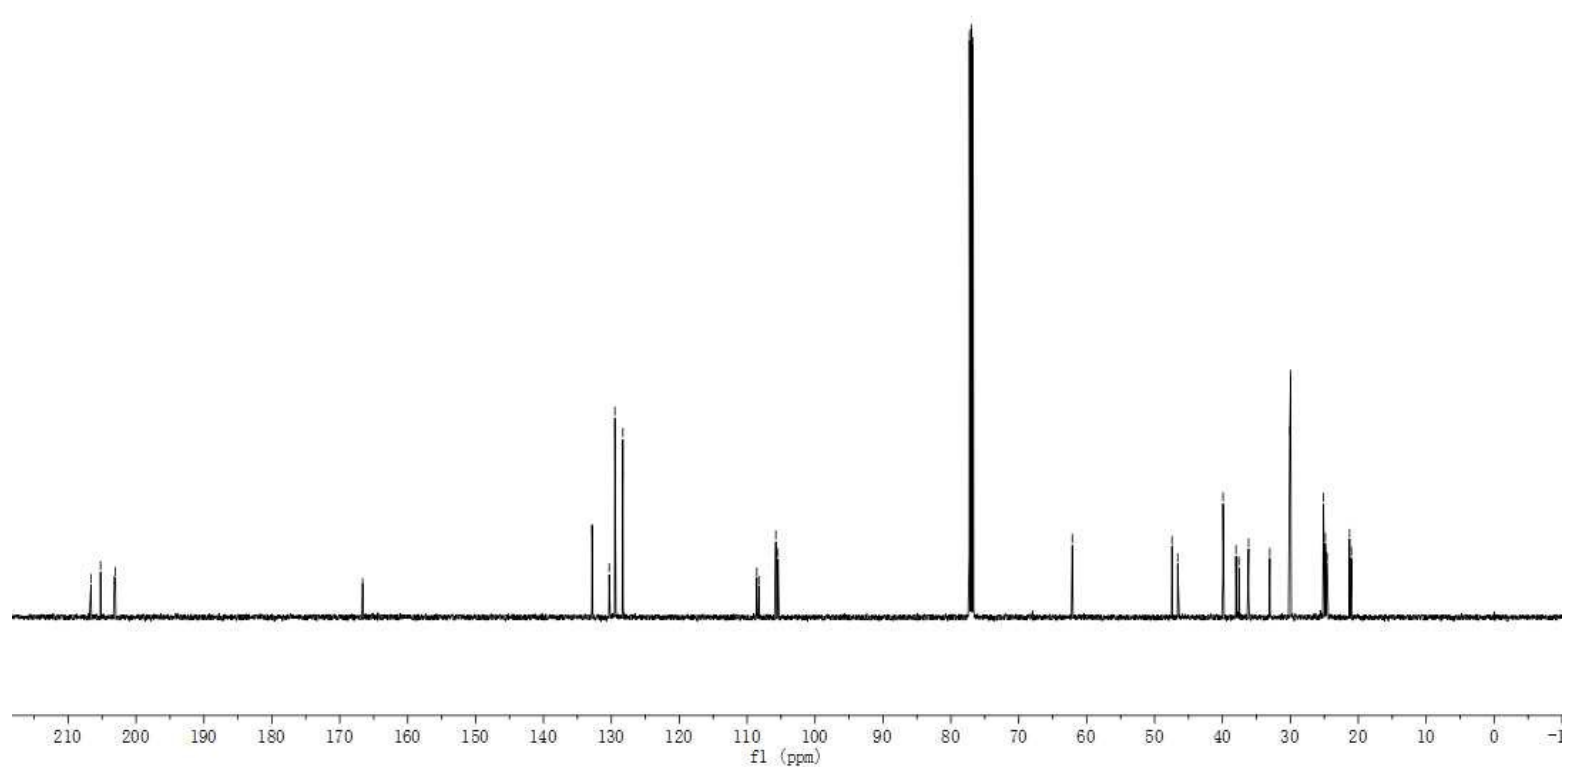

Dec 09 2013  
 7.26  
 5.43  
 5.43  
 2.63  
 2.63  
 2.49  
 2.48  
 2.46  
 2.45  
 2.45  
 2.26  
 2.25  
 2.24  
 2.23  
 1.94  
 1.94  
 1.93  
 1.93  
 1.92  
 1.92  
 1.92  
 1.91  
 1.91  
 1.90  
 1.90  
 1.89  
 1.89  
 1.88  
 1.88  
 1.69  
 1.68  
 1.66  
 1.52  
 1.51  
 1.50  
 1.49  
 1.48  
 1.48  
 1.47  
 1.47  
 1.45  
 1.44  
 1.41  
 1.40  
 1.39  
 1.38  
 1.37  
 1.37  
 1.33  
 1.30  
 1.29  
 1.29  
 1.28  
 1.27  
 1.25  
 1.25  
 1.24  
 1.11  
 0.85

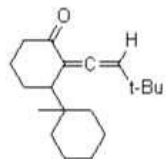

13d(the first fraction)

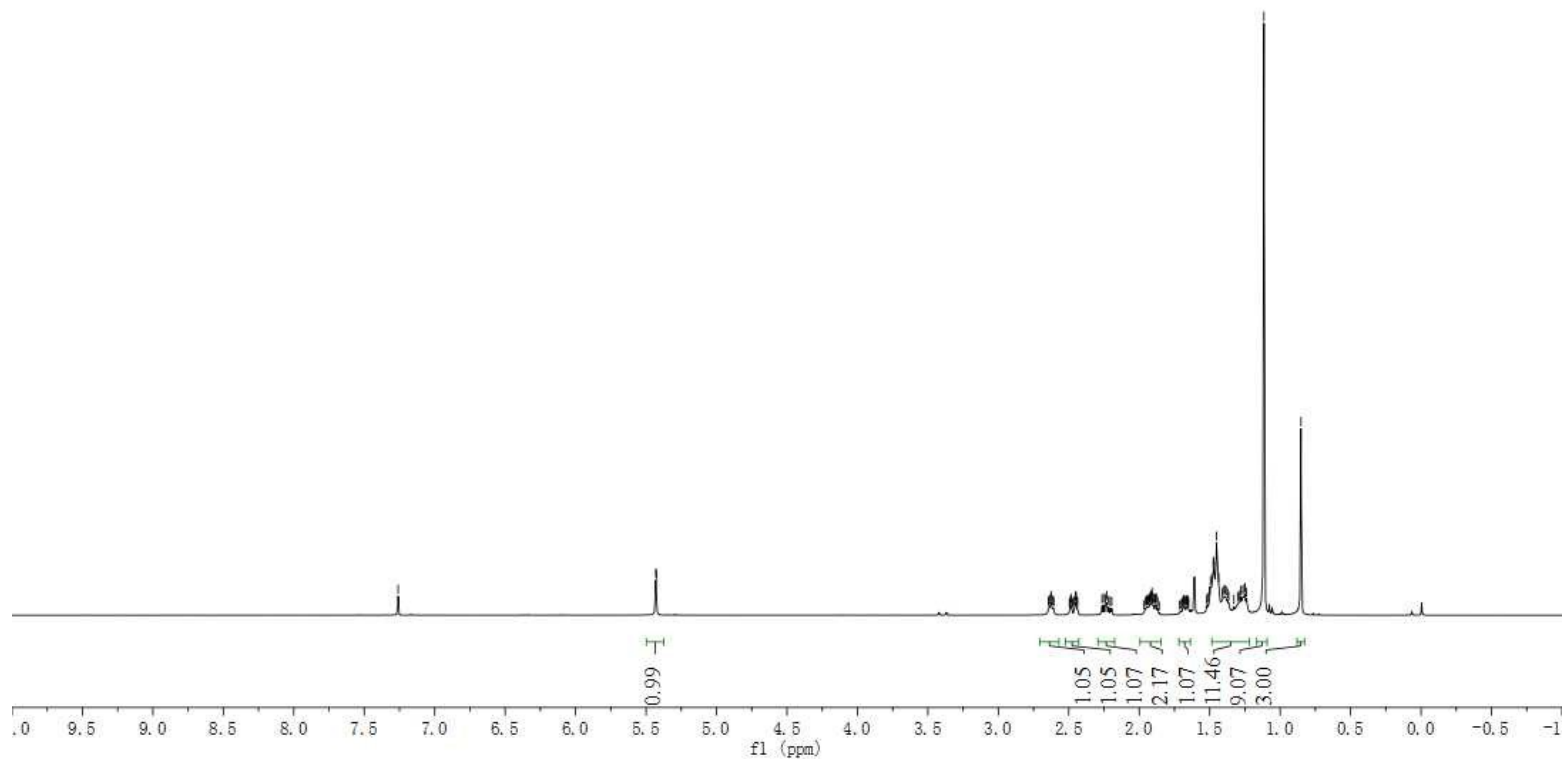

Dec09-2021 111

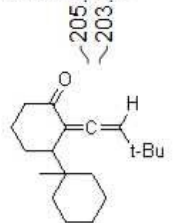

13d(the first fraction)

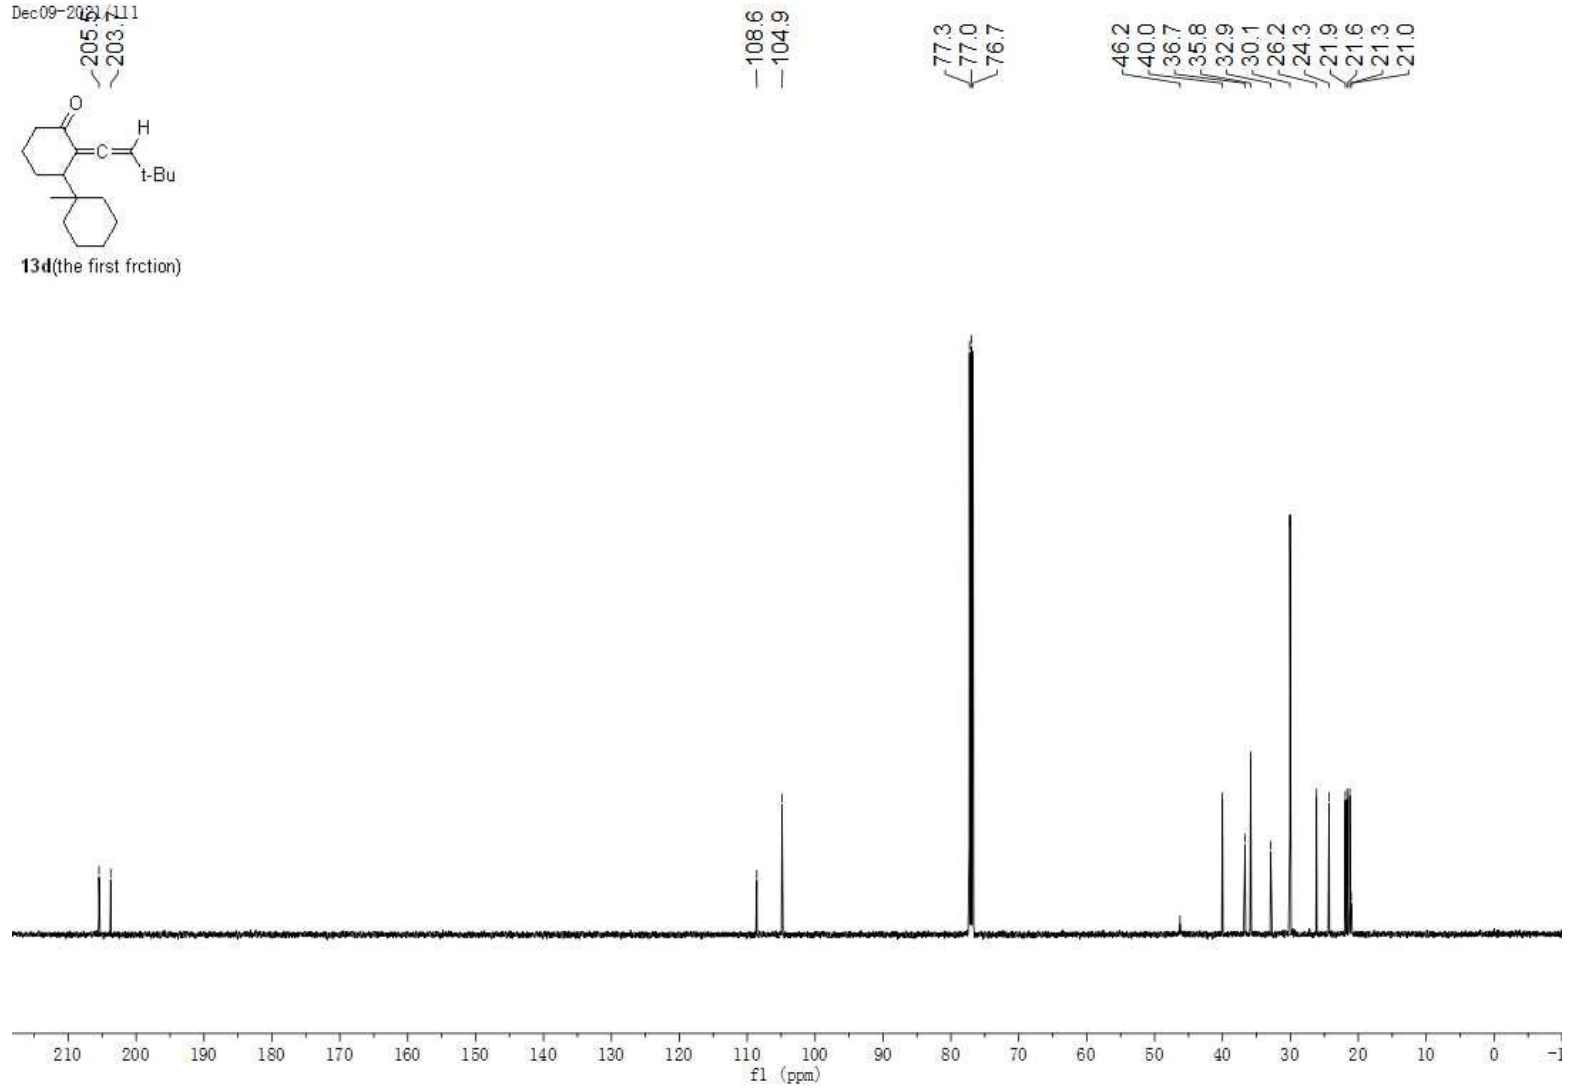

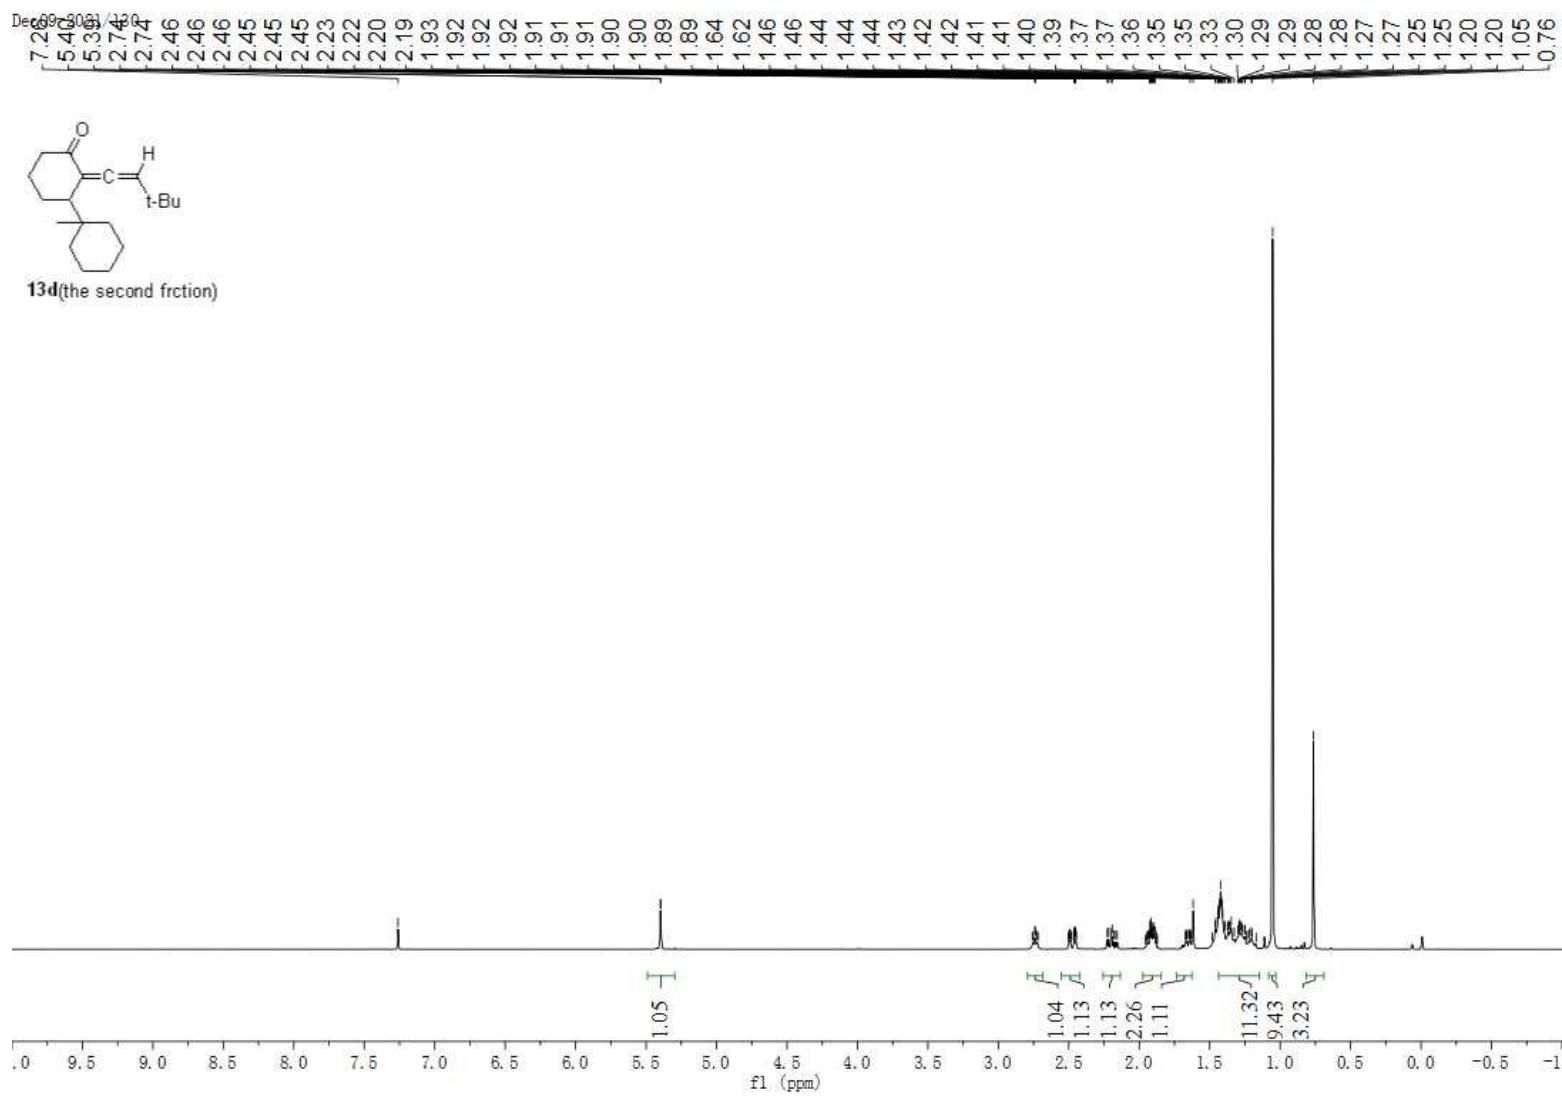



Dec09-2031.331

206.3  
203.3

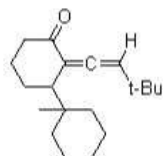

**13d**(the second frction)

108.4  
104.8

77.3  
77.0  
76.7

45.3  
40.0  
38.0  
35.9  
35.6  
33.0  
30.2  
26.2  
23.8  
21.8  
21.6  
21.1  
20.9

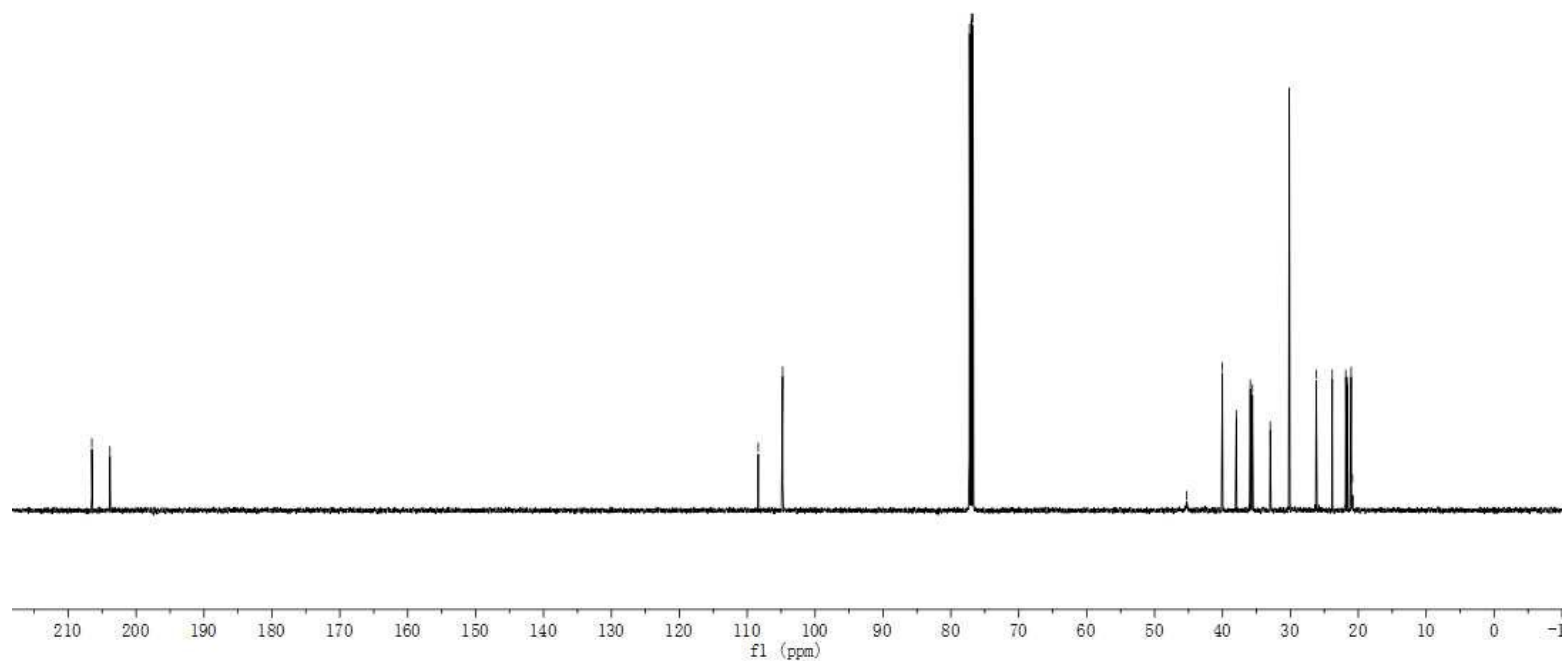

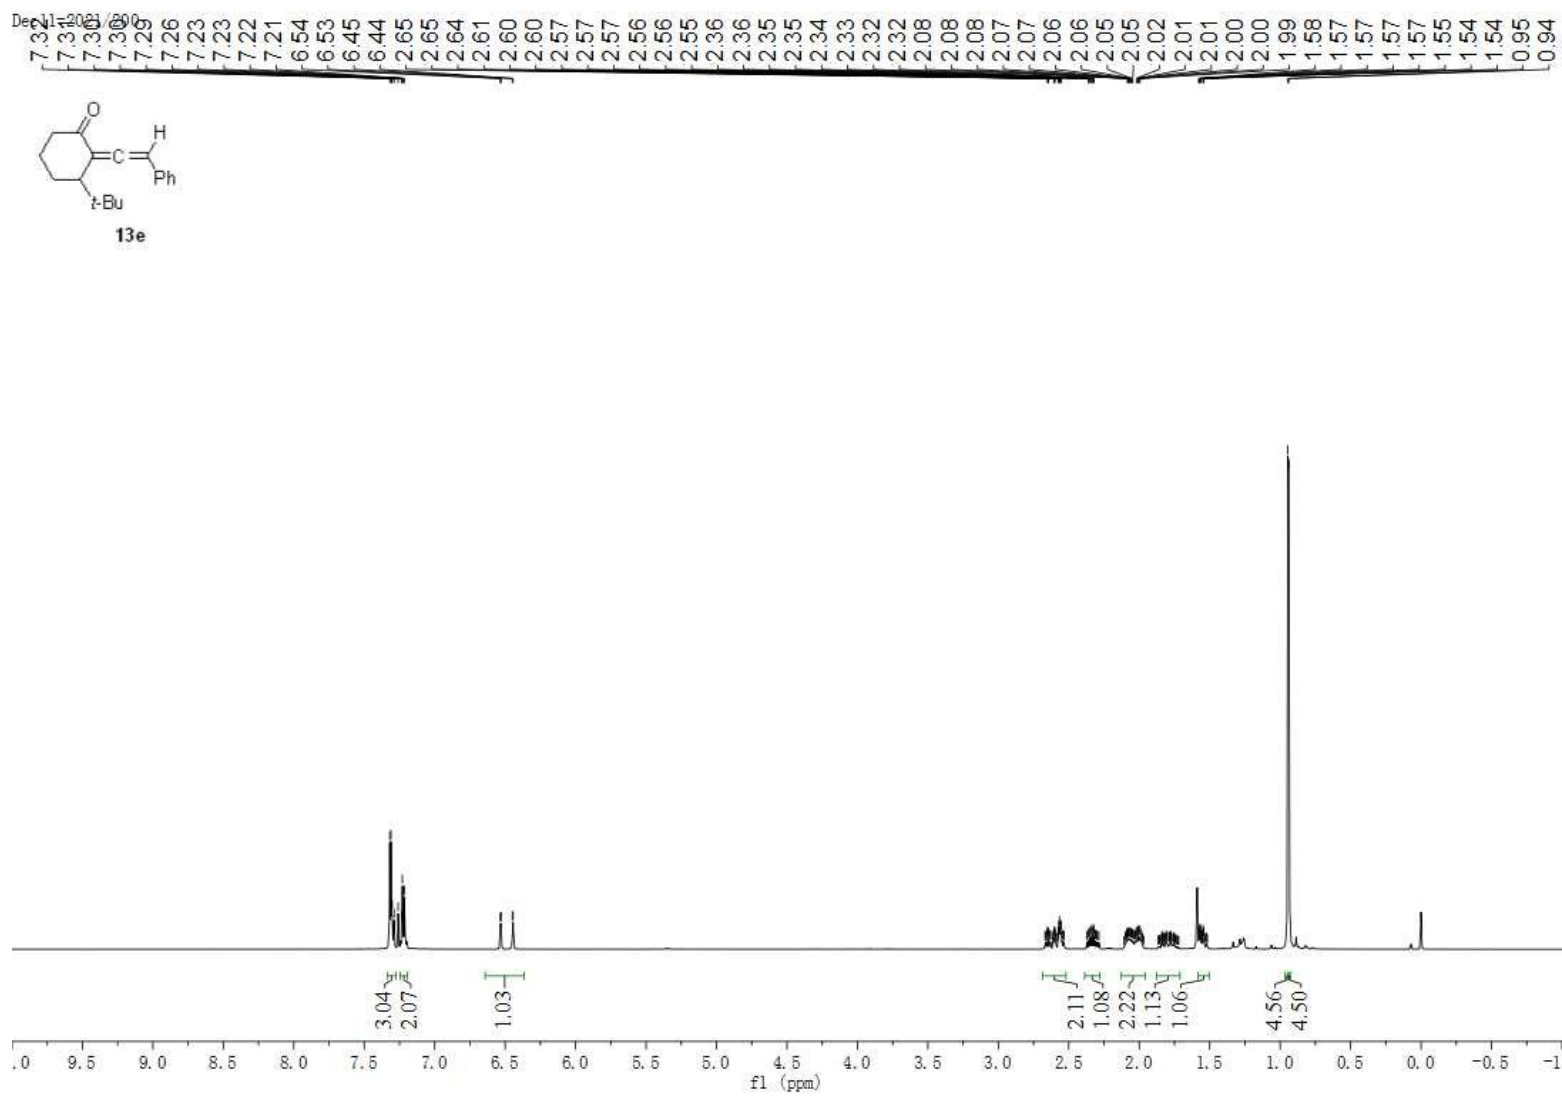

Dec 14, 2021, 2021

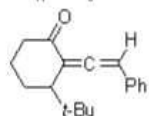

13e

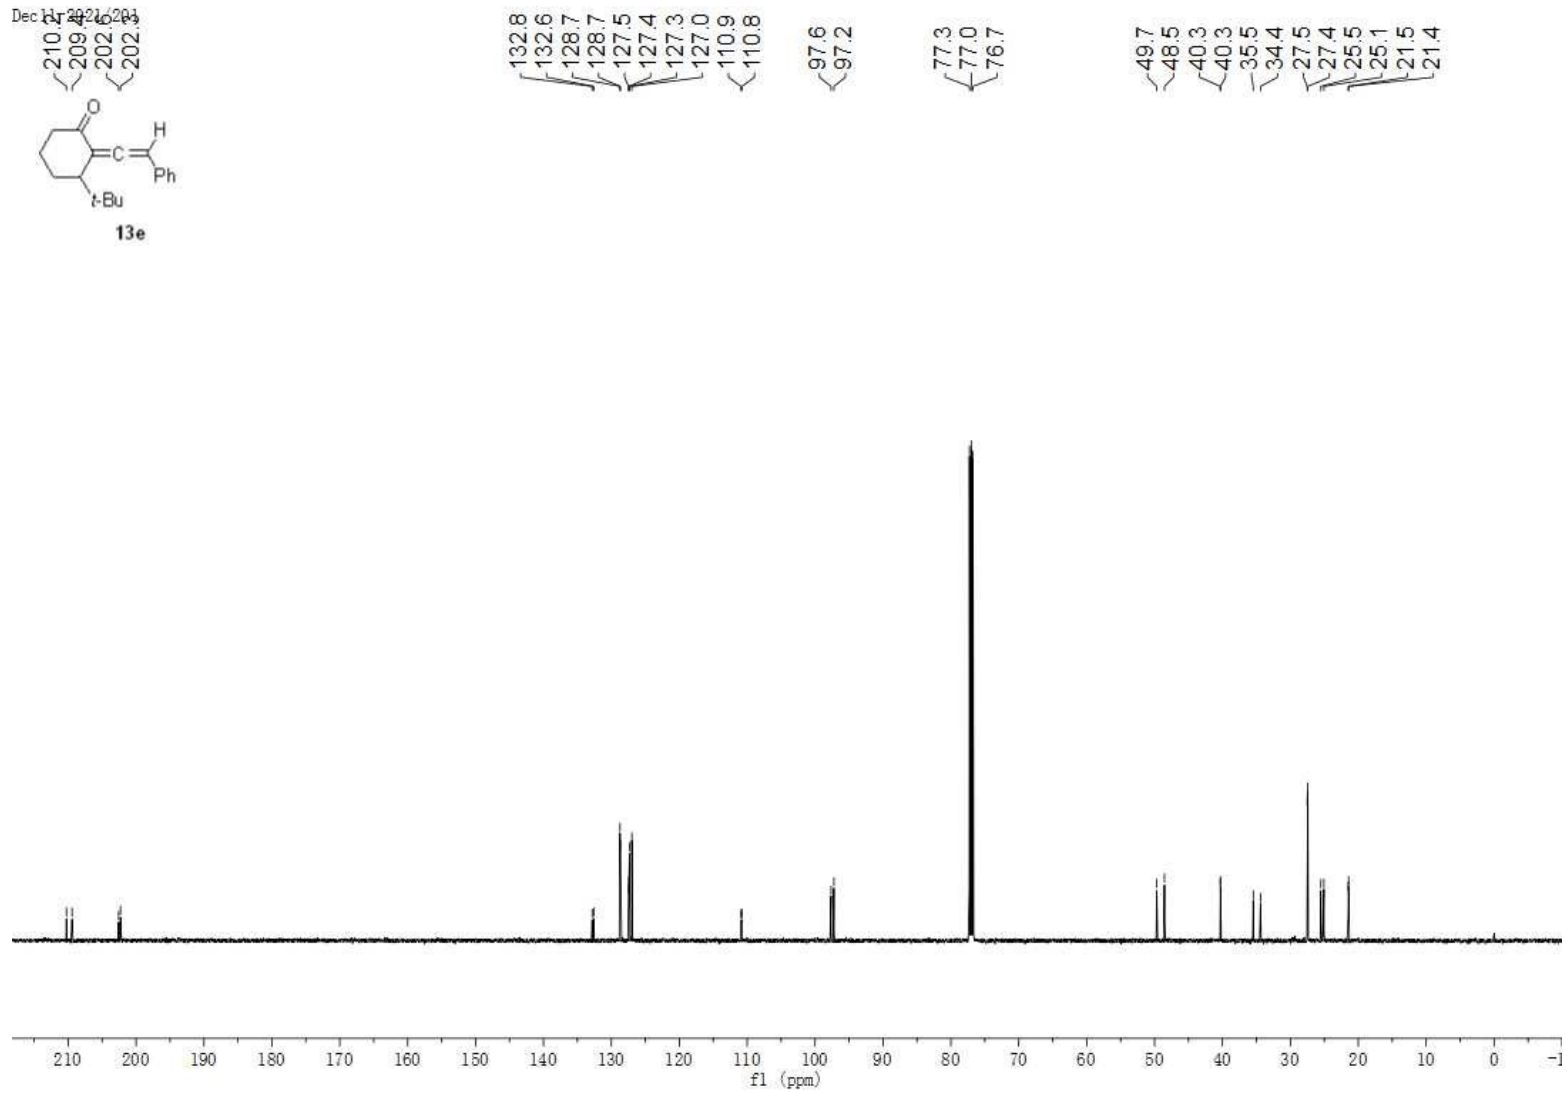

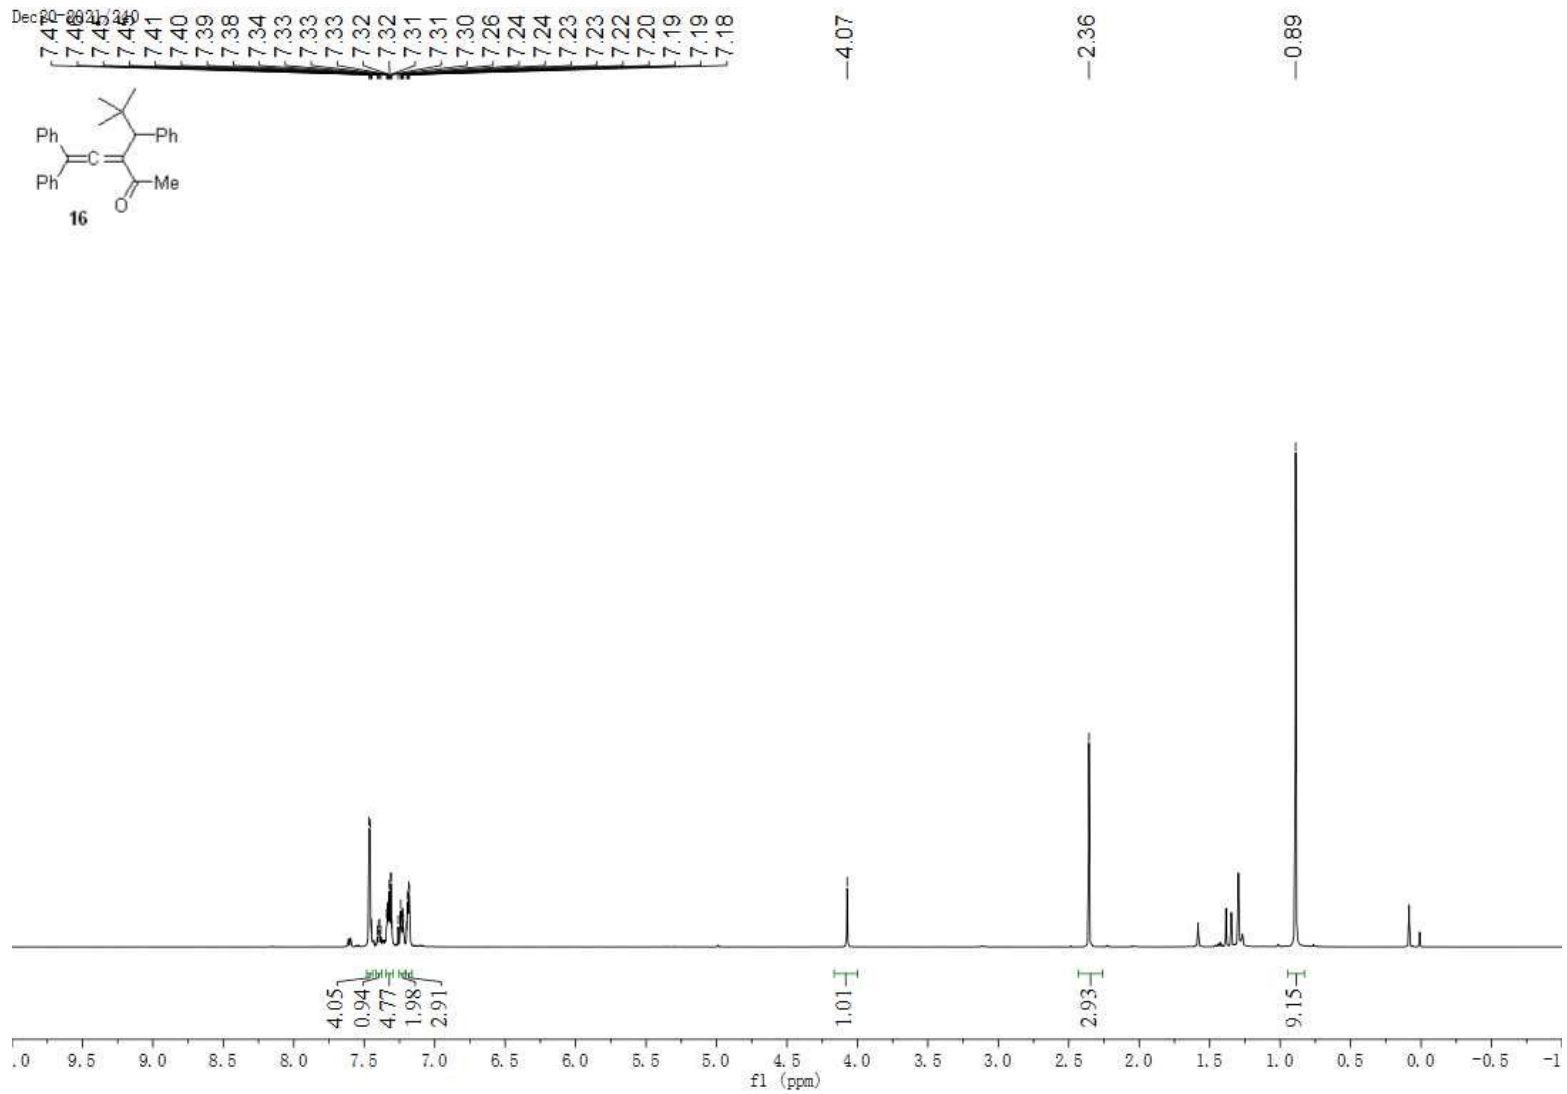

Dec 20-2021/241

— 215.4  
— 197.6

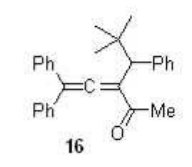

141.3  
134.9  
134.7  
130.3  
128.9  
128.7  
128.7  
128.4  
128.1  
128.0  
128.0  
127.5  
126.3  
113.7

77.3  
77.0  
76.7

52.5

35.1  
28.3  
27.1

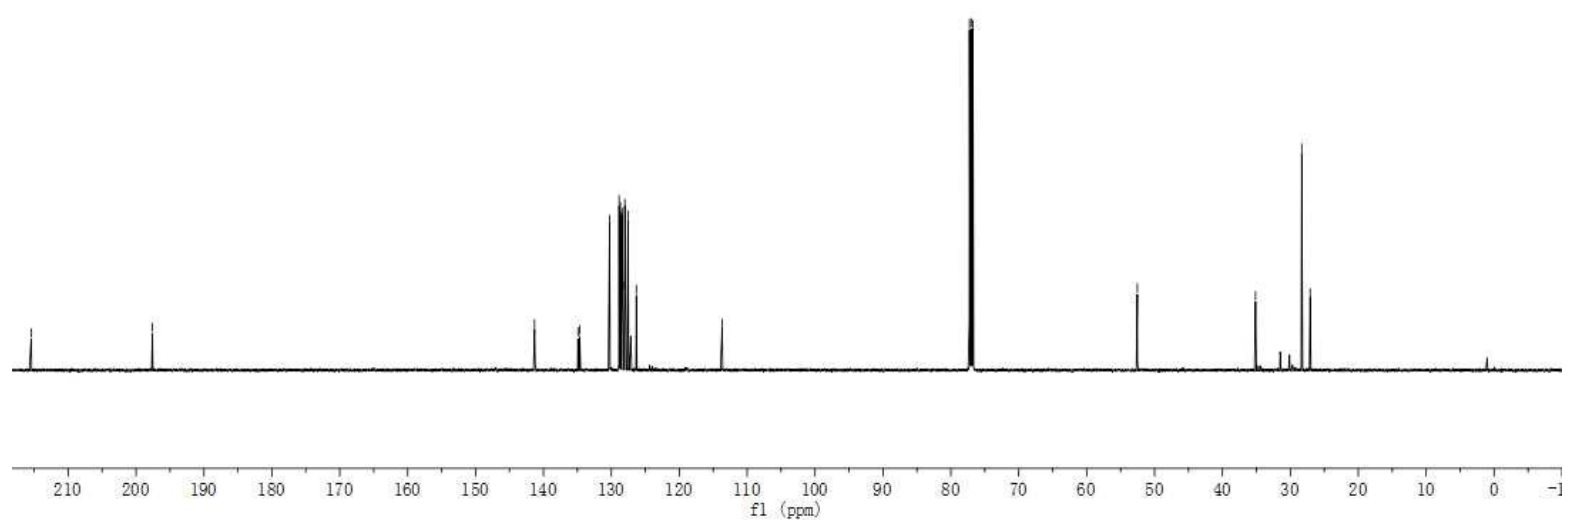

Supplement: d2qo00672c1.pdf [file d2qo00672c1.pdf]
